# Supplementary material for: Dietary nobiletin regulated cefuroxime- and levofloxacin-associated “gut microbiota-metabolism” imbalance and intestinal barrier dysfunction in mice
Source: Royal Society of Chemistry journal article supplement (doi:10.1039/d3fo04378a), 2024-01-01
Supplement: d3fo04378a1.xlsx [file d3fo04378a1.xlsx]

## Sheet: food intake
Day	S-C	S-Anti	S-NOB	L-C	L-NR	L-NOB
2	2.58573	2.39708	2.07583	2.77198	2.49073	2.20583
4	2.70344	2.38604	2.20833	2.45052	2.2099	2.12417
6	2.88125	2.71833	2.49625	2.62188	2.46469	2.64083
8	2.37927	2.61521	2.13417	2.53656	2.3375	2.28958
10	2.60875	1.96437	2.20167	2.54875	2.14479	2.30875
12				2.52469	2.57823	2.36625
14				2.09542	2.03146	1.87437
16				2.56333	2.52219	2.5825
18				2.60104	2.71281	2.64312
20				2.81167	3.16875	2.97125

## Sheet: body weight
Day	S-C
1	21.8	21.04	21.07	20.37	21.81	21.51	21.21	21.16
4	23.05	21.85	21.76	19.51	22.16	22.34	21.75	21.38
7	22.67	20.94	22.5	20.68	22.07	22.7	21.75	21.97
10	23.18	21.79	23.3	20.56	22.01	22.1	22	22.8
Day	S-Anti
1	20.55	21.75	21.04	20.74	22.08	21.26	21.75	22.44
4	20.81	22.37	21.38	22	22.41	22.1	22.65	23.41
7	20.89	22.45	22.19	22.69	23.43	21.75	22.49	24.19
10	21.93	22.47	23.22	22.13	23.38	22.23	22.62	24.68
Day	S-NOB
1	22.32	20.01	21.64	21.25	22.78	21.11	20.93	22.06
4	22.39	21.51	22.96	21.43	22.86	21.75	22	22.33
7	22.83	22.24	23.32	21.75	23.47	21.58	22.02	21.94
10	23.11	22	22.9	22.13	23.72	21.74	22.25	22.61
Day	L-C
1	20.91	21.48	22.35	21.65	21.63	21.15	21.85	21.73
4	20.35	22.34	22.02	21.27	21.68	21.94	21.39	22.56
7	20.46	22.63	21.88	20.96	22.34	21.96	22.27	22.79
10	21.18	23.25	21.67	21.64	22.53	22.06	22.69	23.31
13	21.35	23.41	22.1	21.79	22.51	22.4	23.45	23.3
16	21.83	24.39	22.59	22.26	22.64	22.34	23.42	24.03
19	22.24	24.39	23.17	22.26	22.89	22.53	23.89	24.41
Day	L-NR
1	21.28	22.11	22.19	21.5	21.59	22.19	22.32	20.62
4	22.36	22.5	22.77	22.78	22.01	22.26	22.24	21.56
7	22.26	22.31	23.29	23.47	21.76	22.61	22.21	22.7
10	23.15	22.66	22.75	23.52	21.97	22.35	22.55	23.11
13	23.41	22.75	22.91	23.97	22.91	22.83	23.01	22.89
16	24.37	22.92	23.17	24.24	23.28	23.01	24.21	23.99
19	25	23.35	24	24.24	23.84	23.65	24.93	23.41
Day	L-NOB
1	22.23	20.7	21.12	21.46	21.9	22.14	22.56	21.75
4	22.44	20.8	21.79	21.24	22.94	21.3	22.7	22.08
7	22.7	21.27	22.33	22.19	22.8	21.79	22.66	22.26
10	24.38	21.72	22.7	21.78	22.84	21.6	23.01	22.7
13	23.01	22.41	24.37	22.07	22.84	21.82	23.35	23.08
16	22.83	22.6	25.13	22.54	23.06	21.19	23.59	23.43
19	22.28	22.87	25.1	22.33	23.69	21.88	24.14	24.53

## Sheet: spleen index
S-C	S-Anti	S-NOB	L-C	L-NR	L-NOB
0.252261	0.2391	0.255039	0.247967	0.197455	0.24957
0.248195	0.218069	0.242319	0.269273	0.228873	0.288018
0.243191	0.246238	0.275109	0.239448	0.188838	0.239686
0.259951	0.234975	0.261375	0.265679	0.220374	0.23266
0.260833	0.229885	0.234975	0.239419	0.221239	0.25652
0.268182	0.232279	0.218182	0.236014	0.175017	0.25085
0.258973	0.255267	0.233708	0.259912	0.206838	0.260285
0.256297	0.227378	0.238832	0.246914	0.222717	0.311372

## Sheet: cecum index
S-C	S-Anti	S-NOB	L-C	L-NR	L-NOB
1.0575	3.9808	3.6281	0.8747	1.6072	1.5701
0.8584	3.6568	3.5439	0.9586	1.264	1.5726
0.8123	4.3703	3.1969	0.8362	1.2875	1.3045
0.8281	4.3958	3.3712	0.8442	1.3504	1.6111
0.9922	4.1578	3.3591	0.9582	1.5273	1.6014
0.8727	3.9093	3.6647	0.9222	1.3381	1.3222
0.8811	3.4539	3.2462	0.8855	1.5145	1.364
0.9368	3.547	3.4581	0.8688	1.5724	1.3967

## Sheet: LPS
S-C	S-Anti	S-NOB	L-C	L-NR	L-NOB
4.24131	4.52209	4.02929	4.21421	6.81571	5.1078
4.18728	4.29603	3.34576	4.43596	6.15132	3.85248
3.36727	5.20698	3.97796	3.87726	5.30808	4.46448
3.6599	4.72963	3.38892	4.13394	5.65949	4.72963
3.11796	5.1078	3.34576	4.29603	6.19088	5.1078

## Sheet: QRT-PCR
TNF-α
S-C	S-Anti	S-NOB	L-C	L-NR	L-NOB
0.87	0.51	0.25	0.89	0.71	0.12
0.58	0.6	0.56	0.8	0.54	0.15
1.07	0.57	0.49	0.77	1.12	0.21
0.57	0.43	0.22	0.62	0.98	0.29
0.77	0.37	0.52	0.4	0.69	0.32
IL-1Beta
S-C	S-Anti	S-NOB	L-C	L-NR	L-NOB
0.89	1.4	0.79	0.55	1.43	0.68
0.57	1.07	1.23	0.61	1.08	0.52
0.65	1.24	0.7	0.64	1.55	0.65
0.95	1.19	1.12	0.88	1.12	0.53
0.37	0.92	1.12	0.29	1.06	0.67
MCP-1
S-C	S-Anti	S-NOB	L-C	L-NR	L-NOB
0.78	0.4	0.55	0.72	0.63	0.4
1.01	0.65	0.75	0.72	0.51	0.38
0.82	0.71	0.59	0.72	0.31	0.47
0.5	0.71	0.79	0.78	0.29	0.31
0.71	0.58	0.69	0.81	0.61	0.37
MUC-2
S-C	S-Anti	S-NOB	L-C	L-NR	L-NOB
1.41	1.93	1.18	0.78	5.39	1.39
1.18	1.97	1	1.02	3.3	0.75
0.77	1.72	0.71	0.74	3.82	1.72
1.39	2.27	1.04	0.46	3.72	1.11
0.74	2.31	1.01	1.01	2.14	1.06
occludin
S-C	S-Anti	S-NOB	L-C	L-NR	L-NOB
1.1	1.43	1.48	1.11	1.57	0.89
1.19	2.1	0.85	0.69	1.62	0.82
1.13	1.22	1.27	0.77	1.3	1.03
0.93	1.41	1.43	1.26	2.08	0.73
0.8	1.61	0.96	0.97	1.21	1.14
ZO-1
S-C	S-Anti	S-NOB	L-C	L-NR	L-NOB
0.68	2.3	0.87	0.73	2.27	1.04
1.01	1.85	0.82	0.97	2.52	1.42
0.97	2.27	1.29	0.96	1.78	1.33
1.5	1.27	1.29	1.01	1.75	1.29
0.72	1.57	1.12	1.15	2.08	1.66

## Sheet: shannon index
S-C	S-Anti	S-NOB	L-C	L-NR	L-NOB
7.21026	8.47283	8.54098	6.87325	4.4556	4.87957
7.32172	8.40758	8.52493	6.68993	4.81051	4.51552
7.49664	8.44049	8.54051	6.4154	4.70226	4.37938
7.39717	8.31542	8.47214	6.56774	4.18593	4.15884
7.36159	8.53494	8.36679	6.97832	4.69044	4.30051
7.51569	8.41616	8.53109	6.48429	4.38734	4.23104
7.52568	8.78493	8.6146	6.64759	3.93882	4.6512
7.57234	8.6457	8.54676	6.56857	4.29738	4.77564

## Sheet: pcoa_binary_jaccard_otu_table_e
pc vector number	1	2	3	4	5	6	7	8	9	10	11	12	13	14	15	16	17	18	19	20	21	22	23	24	25	26	27	28	29	30	31	32	33	34	35	36	37	38	39	40	41	42	43	44	45	46	47	48
S-C1	0.378267	-0.00101234	-0.0630443	0.0214793	-0.0148634	0.0225897	-0.00562474	0.0112934	-0.00536862	-0.024524	-0.0178065	0.0125439	0.0218031	-0.0152174	-0.00129879	-0.0196042	-0.0116843	0.0138967	0.0152313	0.0170081	0.00899077	-0.0160677	-0.00551063	-0.00330024	-0.00614821	-0.0113979	-0.0102998	-0.034001	0.0210112	0.0352417	0.0310287	-0.0509087	-0.00862305	-0.000777319	-0.0464988	0.103301	-0.0258301	-0.0351207	-0.0576499	0.0657443	0.164588	-0.0915379	0.00836986	0.180165	-0.0167425	0.116728	-0.0880727	0
S-C2	0.384498	-0.000233911	-0.126851	0.0584453	-0.0118826	0.00277459	3.26261e-05	0.00608281	-0.000139596	-0.014663	0.00675607	0.0100196	0.0137573	0.0143583	-0.00663648	-0.0252061	0.00469764	-0.00547311	0.0168416	0.0227623	0.0213742	0.0117356	0.00353056	0.00372173	0.00765207	-0.0122532	-0.00450201	-0.016087	0.0520743	0.0239695	-0.00970009	-0.0311092	-0.01406	-0.0146926	-0.0111156	0.111724	-0.0517902	-0.041125	-0.0512354	0.0133425	0.0261682	-0.0838605	-0.0966007	-0.133132	0.191334	0.00154325	0.111645	0
S-C3	0.404211	0.0043936	-0.129166	0.056855	-0.0191522	0.00472034	0.00883447	-0.0106935	0.0229509	-0.0115095	-0.00351872	-0.00682674	0.00309413	-0.0198808	-0.0215671	0.00673016	0.0147503	0.0115614	0.00669776	0.000652602	0.00560928	0.0111823	0.0103639	0.0104874	-0.00513286	0.00408104	0.0115481	-0.00172581	0.00897387	0.0302892	0.0171548	-0.0208351	-0.00728399	-0.00343624	0.00675412	0.0578254	0.0432429	-0.0170222	-0.0143521	0.0227641	0.0155577	-0.00469912	0.13652	0.00886479	-0.16966	-0.065135	0.197864	0
S-C4	0.394429	0.0315257	-0.164124	0.0723147	-0.0101135	-0.0335995	0.0105431	-0.00894355	0.0330279	-0.00148118	0.0357195	-0.0123967	0.0046822	-0.0383078	-0.00983645	0.00162015	0.0135777	0.0153429	-0.0016834	-0.00685265	-0.000877587	-0.00106102	-0.015262	0.00673712	0.00242316	-0.0262326	-0.0108449	0.0215136	0.0308122	0.0100916	-0.0178223	-0.0162956	-0.00965879	0.00499938	0.0187117	0.0127014	0.00469951	0.0391607	0.0208298	-0.00431795	-0.101592	-0.00352518	0.227995	-0.0985706	0.0522287	0.0412833	-0.143571	0
S-C5	0.373338	0.0173774	-0.125051	0.0492884	0.0030005	-0.0205837	0.0140379	0.00611104	0.00279183	0.00247212	-0.00805725	0.0401533	-0.0226992	0.0223951	-0.00124705	0.00778874	-0.0160148	0.00217446	-0.0278214	-0.00554057	-0.012718	0.0038731	-0.00135753	0.00296507	0.00773364	0.00461809	-0.00581451	0.0306508	-0.0546535	-0.0752011	-0.0202425	0.0544679	0.0137953	0.0304844	0.0108556	-0.084659	0.108941	0.0446022	0.0753923	-0.0492392	-0.127304	-0.0798434	-0.119823	0.0142138	-0.056026	0.182365	0.0409507	0
S-C6	0.395721	0.0213725	-0.109842	0.0336543	0.00885844	-0.0124925	0.0146683	-0.0193487	0.0051194	0.0232435	-0.0194808	0.0047375	-0.0346484	-0.00747172	-0.00535881	-0.00704514	0.0131003	0.0162672	0.00544856	-0.0079765	0.00217635	0.0124263	-0.0122244	-0.00323686	-0.0144232	0.000970277	-0.00313924	0.027618	-0.00179205	0.00715957	-0.00788204	-0.00281017	0.0287439	0.0603678	0.0604119	-0.0694114	0.0561008	-0.0484241	0.0587852	-0.0652566	-0.0435571	-0.0878149	-0.0482543	0.133045	0.0606659	-0.215606	-0.0522519	0
S-C7	0.365395	0.017007	-0.129657	0.0495137	-0.0189459	-0.00272438	-0.036476	0.00335999	-0.0188087	0.0286344	0.0406689	-7.85684e-05	0.00537525	0.0267683	0.00268178	-0.0152995	0.00799375	-0.0309519	-0.0353123	-0.0120911	-0.0415243	-0.0247835	0.0174494	-0.00507152	0.00989358	0.0230534	0.0198782	-0.00339232	-0.0465025	-0.0266712	0.0106057	0.0266438	-0.0208122	-0.0162311	0.000493486	-0.0833461	-0.066865	0.0536964	0.0260298	0.00694592	0.0427686	0.264091	0.00365361	0.0962041	0.0995148	0.0254779	0.0517178	0
S-C8	0.388343	0.0246049	-0.135541	0.0496621	0.00312549	-0.00376482	-0.0148862	0.00728286	0.00273551	0.0317597	-0.0186338	0.000624986	0.00310599	0.01663	0.0147238	0.0153807	-0.00357945	-0.000967773	0.0132136	-0.00244129	-0.0063043	0.0117649	-0.00266854	-0.00199154	-0.0177988	0.0157764	0.00109255	-0.0289095	-0.0429548	-0.0558202	0.00751139	0.0347834	0.000773247	-0.00891349	-0.0350672	-0.0247769	-0.0380677	-0.000799242	-0.0161187	0.0184787	0.121385	0.0579358	-0.126454	-0.154577	-0.142592	-0.0691284	-0.115258	0
S-Anti1	-0.18561	-0.137642	-0.0286504	0.0349819	0.177203	0.0775177	-0.0806558	0.213961	-0.0465343	0.0968359	0.0660178	0.172083	0.0419397	-0.141846	-0.172225	-0.0303019	-0.0872139	-0.0596762	-0.00104344	0.0437364	0.055568	-0.0604937	-0.132401	-0.0205038	-0.00170045	-0.0482847	0.0559746	0.0345567	-0.0396172	0.0635917	0.0437997	-0.029206	-0.00766532	-0.0218878	0.0101389	-0.0208369	0.00689947	-0.00825482	0.00294119	0.00868011	-0.0115536	0.00329285	-0.00691747	-0.00916848	-0.00690786	-0.00728635	0.000527842	0
S-Anti2	-0.18801	-0.159486	-0.027455	0.0550366	0.0434847	0.124497	-0.0642124	-0.0299354	0.0684211	0.0191246	-0.0920494	-0.104594	0.184753	0.103496	0.0703818	-0.0818666	0.130792	-0.23849	0.122852	0.0037217	0.0716012	0.0329852	-0.0363482	0.0325618	0.0842306	-0.0591594	-0.0128024	-0.0375044	-0.0184049	0.0127722	-0.0303282	-0.0375044	-0.0677605	0.0450359	-0.00215139	-0.0222332	0.0278604	0.0202043	0.0208288	-0.0148437	-0.00863524	-0.00501877	0.00253482	0.00612774	-0.00828653	0.00256181	-0.005141	0
S-Anti3	-0.181453	-0.16712	-0.0469226	0.0148929	0.0133184	0.103234	0.0318798	-0.00660056	0.156105	-0.338735	-0.126588	-0.0423277	-0.06994	-0.0448241	-0.0478114	-0.0654508	-0.134755	-0.0256541	-0.104821	0.0687919	-0.0696216	0.0138485	-0.0587843	0.0167173	-0.00938856	-0.059678	-0.0437493	0.0247751	-0.00287813	-0.0387312	-0.0189953	0.0216423	0.0264439	-0.0260332	-0.00776685	-0.0288713	-0.00453783	0.00412616	-0.0178343	0.0125453	0.0047677	0.0197954	-0.00259151	-0.00138597	0.00692648	-0.0168313	-0.00220169	0
S-Anti4	-0.186543	-0.153109	-0.0450547	0.00438644	0.142681	0.0480624	0.0668266	0.000611924	0.129291	0.0334636	0.165738	-0.182163	0.0618104	-0.0382087	0.0462538	-0.0304421	-0.0186551	0.248478	0.0484216	-0.0504403	0.0303009	-0.0557627	-0.0713266	0.0537284	0.135506	0.0778885	-0.00101208	-0.0601598	0.0424739	-0.00553887	-0.0284959	-0.0164764	0.0583945	-0.00701321	-0.0034534	-0.0251591	0.00479442	-0.0200339	0.0220542	0.00250756	0.0100776	0.0106273	-0.0230948	0.00503229	-0.0021701	0.0110984	0.00895594	0
S-Anti5	-0.180417	-0.168409	-0.0324105	0.0352343	0.101818	0.00467744	0.181212	0.148024	-0.0803933	-0.00449447	-0.114026	0.0419747	0.0927471	-0.113368	0.152886	-0.0381792	0.0654378	0.0535383	0.0363269	0.0572452	-0.0866136	0.162533	0.117085	-0.108116	-0.051941	0.109192	0.0171936	0.0110911	0.0240336	-0.0188261	0.0646368	0.0570954	-0.0253728	-0.000134437	-0.025524	-0.00722632	0.00128197	0.00185319	-0.00306269	0.00832073	-0.0128959	0.00313177	0.0162965	0.00342257	0.014322	9.60398e-05	0.000464008	0
S-Anti6	-0.175746	-0.154845	-0.0167621	0.0136743	0.152696	0.0712778	0.0373739	-0.160533	0.155408	0.106302	-0.00882997	0.241246	-0.144479	0.108408	0.127295	-0.0210519	0.0314051	-0.0149097	-0.0672557	-0.0760647	-0.0310779	-0.0804013	0.00987178	-0.0556611	-0.0484569	-0.00450272	-0.0561113	-0.0687228	0.036398	0.0682191	0.0242904	0.0414534	0.00568634	0.00106072	0.0138288	0.0343665	0.00227861	-0.00773418	-0.0137518	-0.0084248	-0.00100857	0.0101938	0.01066	-0.00498666	-0.00261411	0.0059793	-0.00163421	0
S-Anti7	-0.158956	-0.213071	-0.0244783	0.0441752	-0.00610759	0.0931095	0.0606117	-0.0871542	-0.146372	-0.0957424	0.251601	0.0286174	0.0368008	0.180681	0.00847821	0.164871	-0.123083	-0.0734393	0.0306332	0.011867	-0.0261259	0.119675	-0.0100436	-0.0208751	-0.0417448	0.0673433	0.0181032	0.0624367	-0.0240465	0.0121595	0.00270222	-0.0500216	0.0426835	0.0195736	0.0107815	-0.00622103	0.00195026	-0.00406437	0.00371486	0.00958714	0.0142754	-0.0175054	0.0143772	-0.00170168	-0.00164912	-0.00448133	-0.0084119	0
S-Anti8	-0.17754	-0.173979	-0.0474067	0.00878806	0.150967	0.102428	-0.0758389	-0.137631	-0.123822	0.0956757	-0.0770477	-0.177457	-0.0908251	-0.00842356	-0.159338	0.0460573	0.0390569	0.0527235	0.00551209	0.121242	0.0148313	-0.0877903	0.168084	-0.00186589	-0.109078	-0.0192238	-0.0469611	0.0488874	0.0139931	-0.0600413	-0.00171403	0.00768263	-0.0356777	0.000864458	0.0190581	0.0128563	-0.018534	0.0054505	-0.00320087	0.000557552	-0.00518531	-0.00750976	0.0028467	0.000223981	0.00105216	0.012793	-0.00125632	0
S-NOB1	-0.172509	-0.171121	-0.00212113	-0.0356582	-0.141272	-0.0828614	-0.127339	0.0335717	0.0197018	0.0392046	0.0401472	0.0365162	0.0713828	0.0104208	-0.11574	-0.0548419	-0.0939444	0.0551674	0.0558758	-0.0807348	-0.170961	0.0462737	0.0974799	-0.150085	0.040646	-0.0833176	-0.151238	-0.129045	0.0532	-0.0342621	-0.0230316	-0.0698795	-0.0511419	0.0361167	0.0163234	-0.0112214	0.0140328	0.00585297	0.0101298	-0.0298431	-0.00299221	-0.00259475	-0.00561308	-0.00224757	-0.0114483	-0.00759024	0.00315043	0
S-NOB2	-0.170053	-0.15532	0.00848868	0.0214304	-0.146568	-0.0585551	-0.0302699	0.0874004	0.0317668	0.0386155	-0.0307509	-0.0453386	0.0365599	0.147251	0.0336037	-0.144468	-0.0684161	0.0875435	-0.0137918	0.00502505	0.00776975	-0.0530263	-0.0165546	0.0864236	-0.261016	0.0305834	0.160965	-0.0198062	0.00186856	0.0725785	-0.0566227	-0.0135224	-0.0546008	0.0021395	0.0199188	0.00667978	0.0290531	-0.00530698	0.0295474	0.0357191	-0.0213313	0.0046668	-0.00665598	-0.00458553	-0.00336739	0.00214436	-0.00824271	0
S-NOB3	-0.183379	-0.181799	-0.0403047	-0.00527743	-0.0850752	-0.0503526	-0.100802	-0.0267427	0.0821585	-0.0629908	-0.0782821	0.036028	0.115179	-0.0496452	-0.0211806	0.160963	0.131346	0.0371472	-0.0242944	-0.162919	-0.000794891	-0.0948111	0.0432512	-0.102557	0.019133	0.0293697	0.0946006	0.212874	-0.0113651	0.027911	-0.0425853	-0.0244436	0.0575926	-0.0442851	-0.00210417	0.0168019	0.00958691	-0.0391847	-0.0155365	0.00656453	0.0095257	0.00777489	-0.0226842	-0.0025086	0.00412949	0.00671044	-0.00715553	0
S-NOB4	-0.174896	-0.16702	-0.0104694	-0.0299823	-0.104512	-0.179233	0.0400681	0.0796497	0.0563141	0.112565	0.062303	-0.0853751	-0.0461527	0.0497877	-0.00434287	0.0174454	0.103525	-0.0574477	-0.148202	0.206953	0.01418	0.0179706	-0.117415	-0.0779198	0.0318886	0.0192547	-0.135984	0.0727489	0.00531307	0.0487468	-0.0406755	0.0660922	0.0611531	0.0359022	-0.0139103	0.0452379	0.00692698	0.021834	-0.00253014	0.0106987	0.024349	0.00295473	-0.00528398	0.00721296	-0.00847428	-0.00325186	0.00228524	0
S-NOB5	-0.171803	-0.181732	-0.0250261	0.0146846	-0.0275653	-0.131734	0.137844	0.0396917	-0.161591	-0.0297584	-0.110107	0.0991283	0.012023	0.0429569	0.0361021	0.0537536	-0.0297391	0.0210616	-0.0112684	0.019304	-0.0379897	-0.153922	0.0688318	0.226276	0.158882	-0.0309126	-0.0606859	-0.0196067	-0.070635	0.0404536	-0.0284377	-0.0616676	-0.0250388	-0.00365607	0.0179599	0.0185332	-0.0218586	0.0019844	0.0334505	-0.0141208	0.00481631	0.00258146	0.00493272	-0.00678565	-0.00642272	-0.0148946	-0.00500359	0
S-NOB6	-0.170751	-0.162713	0.0146585	0.00579392	-0.09903	-0.125631	0.0232852	-0.0312946	0.15341	0.0149994	0.0448401	0.0691325	-0.182518	-0.0332247	-0.0293016	-0.0187122	-0.0242513	-0.00221495	0.212534	0.0755154	0.156866	0.0899438	0.0980976	0.0108278	0.0641742	-0.0323137	0.100221	0.0239074	-0.0909757	-0.0883803	0.046869	-1.09789e-05	-0.0170642	-0.0305979	-0.0287657	-0.00492943	-0.0258471	-0.0151494	-0.00836327	0.0115377	-0.00494843	0.00489778	0.0086906	0.0149597	0.0101967	0.00154575	-0.0025508	0
S-NOB7	-0.168387	-0.155657	-0.0212524	0.0205901	-0.13145	0.00330695	-0.0191165	-0.0039786	-0.147634	-0.0729143	0.0879848	-0.0802867	-0.168103	-0.183393	0.0511822	-0.0428743	0.0878928	-0.119043	0.100394	-0.144965	-0.0399305	-0.103585	-0.0982264	0.0233224	-0.0623634	0.0748305	-0.0379669	-0.0679721	0.0228714	0.00707338	0.0480022	0.0855508	-0.00374447	0.00819144	-0.000576595	0.0210878	0.0268134	0.00918448	-0.0131825	-0.0175561	-0.00203827	-0.00864351	-0.0117171	-0.00491306	8.49408e-05	0.00386373	0.00185855	0
S-NOB8	-0.175238	-0.177462	-0.045795	-0.0196169	-0.042293	-0.0495294	-0.0996372	-0.129493	-0.13566	0.0653753	-0.123436	-0.000100908	0.011171	-0.0399404	0.0180317	0.0362473	-0.0439185	0.0532498	-0.187175	-0.0728054	0.128932	0.17324	-0.111279	0.0268411	0.0615817	-0.0426073	0.0996806	-0.114729	0.0481322	-0.0610615	0.0426217	0.0314381	0.0174716	0.0205171	-0.0131987	-0.0177137	-0.0362657	-0.0125427	-0.0249971	-0.000762074	-0.0141702	-0.00753085	0.0172298	0.00684211	0.00421499	0.00480779	0.0050478	0
L-C1	0.230531	-0.060103	0.159181	-0.0856338	0.0300619	0.00117069	-0.0306233	0.0450316	0.0345759	0.0116715	0.0149949	0.00321124	0.0559058	0.0343436	0.00888634	0.0154598	-0.000910719	-0.0121635	-0.0143924	-0.0587106	-0.0184792	-0.0294365	-0.0173183	0.0176981	0.0098519	0.0487734	-0.042887	0.000698083	-0.0941629	-0.137687	0.0124403	0.104862	-0.0392941	-0.00808758	0.174186	0.00450492	-0.100424	0.0635987	-0.0502009	0.190745	-0.0477418	-0.0695038	0.0153639	0.0115045	0.00498513	-0.0278393	0.00764442	0
L-C2	0.244255	-0.0583394	0.170322	-0.0758419	0.0187583	0.0308333	-0.00305227	0.036267	0.0291687	-0.0149361	0.00390454	-0.0123779	0.0405163	0.0251658	-0.0452837	-0.0128108	-0.00272629	-0.0166454	-0.00907838	-0.0359728	0.000670449	0.0403133	-0.0169916	0.0372204	-0.0291661	0.0243253	-0.0230266	0.0198011	-0.0195769	-0.0394302	0.0311318	0.0777776	-0.000695978	-0.0383643	0.00368466	0.153984	-0.141664	-0.121805	0.146177	-0.183665	-0.0266028	0.0267411	0.00995211	0.00690562	-0.0282643	0.0196701	-0.00744518	0
L-C3	0.215868	-0.0598149	0.191886	-0.0977353	0.00709709	0.0273349	-0.00302838	-0.00732282	0.00118915	-0.0196272	-0.030456	0.00631207	0.00410858	-0.0299799	-0.0191613	-0.00312262	-0.0418663	0.0127541	-0.00860573	-0.0233375	0.0793047	0.0207224	0.0587249	0.00402635	0.019729	0.00217177	0.0203908	0.00986807	0.0338877	0.0356546	0.0498254	0.0200332	0.063507	0.0368648	0.0560277	0.0682154	0.172774	0.19827	0.114589	-0.01708	0.130314	0.0182912	0.00683104	-0.0392807	0.0404613	-0.0105858	0.00015918	0
L-C4	0.252305	-0.0755801	0.115964	-0.0783549	0.0227598	0.00917204	0.0142495	0.017724	0.0169887	0.0272498	-0.00155203	-0.0201496	0.0414324	0.0116691	-0.00421856	0.0411308	-0.00861452	-0.00234785	-0.0179137	-0.0148849	0.00503682	-0.0235258	-0.00602086	0.013626	-0.0529704	0.039362	-0.0193051	-0.0650674	-0.104062	-0.033023	-0.0324641	-0.0591318	0.0312929	-0.107443	-0.182143	0.0328582	0.0344277	0.125958	-0.184381	-0.103495	-0.0878613	-0.00249965	-0.00264843	0.0272759	0.00848369	-0.0414865	-0.00612723	0
L-C5	0.250769	-0.0583498	0.132945	-0.0854699	-0.00596045	-0.0258633	0.0412408	-0.0204277	-0.0488543	-0.0256209	0.0189079	0.0198166	0.000153078	0.0175223	0.0101292	-0.0725884	0.014546	0.00427271	0.0320912	0.0485236	0.0171679	-0.0318811	0.000611788	-0.0259185	0.0299552	-0.0285892	0.056483	0.0558695	0.127146	0.0553759	-0.0546411	0.0380174	-0.0190579	-0.0213492	0.125004	-0.182632	-0.0647228	-0.00369662	-0.14145	-0.143461	0.0727513	-0.0320139	0.0279304	-0.0211801	-0.0226994	0.0356978	0.0130901	0
L-C6	0.279201	-0.0196763	0.149654	-0.102828	0.00904591	0.0175399	0.0391408	-0.015306	-0.0170821	-0.00161061	-0.00317665	-0.0249971	-0.0242128	-0.0341984	-0.00909319	0.0119825	0.0085391	-0.0163553	-0.0176344	0.0154398	0.0127221	0.0514987	0.0141995	0.0210976	0.0229699	-0.00399226	-0.0219119	-0.0138154	-0.00389998	0.0408105	-0.00582265	-0.0597499	-0.0348948	0.0307812	0.0779221	0.0439828	0.179919	-0.203523	-0.0945432	0.0676247	-0.0724017	0.128058	-0.0386668	-0.016128	0.00139423	0.025137	-0.0326536	0
L-C7	0.279104	-0.0224919	0.116806	-0.0554101	0.00290331	-0.00507399	-0.0183926	-0.0641074	-0.0424767	-0.0537736	0.0210269	-0.0140677	-0.0288547	-0.0439138	0.0441758	-0.00479745	0.0174919	-0.00262741	0.0349883	0.0653707	-0.0209151	-0.00733568	0.0180945	-0.0509126	0.043225	-0.0743303	0.0613518	-0.00196222	0.135238	0.162109	0.0118268	-0.0639641	0.0225485	-0.0126986	-0.0720032	0.00710898	-0.126407	0.0783289	0.0785966	0.1107	-0.141443	0.0213098	-0.0777555	0.0165408	-0.0547561	-0.0168568	-0.0117239	0
L-C8	0.221484	-0.0403879	0.168273	-0.112604	-0.00301599	0.0343164	-0.00432904	0.0213582	-0.0116223	0.0458978	-0.0526596	-0.0127712	-0.0466499	0.0167412	0.0363314	0.044516	-0.00685644	-0.0056445	0.00827724	-0.0130623	-0.0354741	-0.0519705	-0.046077	-0.0283479	-0.0246225	-0.0060856	-0.0257313	0.00218014	-0.0496003	-0.0405814	-0.00959963	-0.0289199	0.00982059	0.0449631	-0.19215	-0.175298	0.00710695	-0.110257	0.104322	0.073163	0.0705223	-0.0554221	0.0783836	-0.0465081	0.0444424	0.00813543	0.0360882	0
L-NR1	-0.0866059	0.143148	0.1151	0.176045	-0.000328455	0.0381043	-0.151075	0.0321851	0.00579198	-0.0500308	0.0472122	0.08615	0.0416902	-0.088982	0.0868186	0.101914	0.0249075	0.0940532	0.0516442	0.0414989	0.0576986	0.0589161	0.0432148	0.1068	-0.0770999	-0.0946917	-0.0978875	-0.0133589	-0.0121563	0.0420271	-0.159885	0.125638	0.0369651	0.125653	-0.0316076	-0.00143482	-0.0152716	-0.000868571	-0.0338204	-0.00422785	0.00446849	0.0227846	0.00229274	0.0118078	0.0034634	0.000272625	0.010574	0
L-NR2	-0.113503	0.155278	0.0955311	0.163517	-0.0207561	0.0795285	-0.00485923	0.0481234	-0.0880727	-0.0538197	0.0406444	0.0157066	-0.0889063	0.0526433	-0.0542375	-0.120855	0.182961	0.03682	-0.0923051	-0.0184177	0.0191173	0.0588682	0.0559137	-0.0661941	0.0467815	-0.00472109	0.0233033	-0.0902299	-0.109624	0.0112099	-0.100127	-0.0760216	0.0999936	-0.163711	0.0504314	-0.0209913	0.00307409	-0.0167568	0.0479749	0.0206713	0.01858	-0.0265952	0.0130006	-0.00893114	-0.00364376	0.00114186	-0.0081918	0
L-NR3	-0.104128	0.161314	0.121193	0.13539	-0.0193804	0.0262031	-0.0255625	0.0263355	0.0575901	-0.0219643	-0.020682	0.0411338	-0.0401795	0.0502051	-0.131214	0.00644286	0.0862118	-0.0102903	-0.0390537	0.0464575	-0.109931	-0.0323039	0.00236971	0.0453601	0.0733991	0.166342	0.127007	-0.0408318	0.0626429	-0.0640996	0.074864	-0.0574089	0.0184695	0.228287	-0.029996	0.0148752	-0.0255789	0.0184797	-0.0487392	-0.024615	-0.0161777	-0.00035181	0.00395352	-0.0103988	-0.0035955	0.00173449	-0.0073719	0
L-NR4	-0.0982119	0.162888	0.0626471	0.149735	0.0597024	-0.108269	0.0112554	0.0912208	0.0901247	0.0391633	0.00662745	-0.101853	-0.0187695	-0.0660169	0.0800492	0.162431	-0.143766	-0.180772	-0.0834692	-0.0179145	0.051718	-0.0575118	0.107866	-0.0268383	-0.0223137	0.0432331	0.0368169	-0.0990499	0.117341	-0.0409155	-0.0525231	-0.0486333	-0.014849	-0.0838713	0.0410209	-0.0219771	-0.00173339	-0.0267146	0.0299618	-0.010675	0.0103103	-0.0171	-0.00305512	0.0120869	-0.00353244	0.0020355	0.00237452	0
L-NR5	-0.10416	0.185456	0.0620168	0.133567	0.0725072	-0.0334568	0.135168	0.104233	-0.0510347	0.00105326	-0.0592134	-0.073767	-0.104305	0.15812	-0.0956896	0.0100601	-0.0254205	0.0444951	0.0391451	-0.188624	0.0513565	0.0459176	-0.0610037	-0.0525559	0.0421858	-0.0927324	-0.0359341	0.109054	0.0706133	0.0217105	-0.00550889	0.0800754	-0.127423	0.00854903	-0.0703162	0.0241825	0.0137484	0.0303935	-0.033424	0.0227713	-0.0061038	0.0206906	-0.00766488	0.0164905	-0.00203214	-0.010891	-0.0022122	0
L-NR6	-0.113222	0.145393	0.119236	0.145385	-0.00889962	-0.0771873	0.0159128	-0.114547	0.000664495	0.00964692	0.0220495	0.0512048	0.0642555	-0.0634131	0.0649176	-0.0604862	0.0404097	0.0466246	-0.00233461	0.0183332	0.0199961	0.00997666	-0.111419	0.0563945	-0.108351	-0.0276436	-0.129012	0.125764	0.0528421	-0.130622	0.121632	-0.195451	-0.0379534	-0.0542515	0.0266767	-0.0225139	-0.000480352	0.0242292	0.0180007	-0.00685272	0.0116409	0.0177668	-0.0227335	-0.00246256	-0.00704454	0.00131613	0.0115233	0
L-NR7	-0.129239	0.21586	0.0372057	0.079495	0.00468953	-0.0837499	-0.00169275	-0.113171	-0.00718515	-0.0230562	0.0431906	-0.0842315	0.0962543	-0.0368669	0.0154038	-0.128351	-0.113804	-0.0215462	-0.0798341	-0.0324525	0.0605798	-0.0549253	0.106061	-0.0731931	0.021768	0.0156139	-0.0302125	0.0271399	-0.181566	0.153057	0.154405	0.0616148	0.013126	0.0731502	-0.0240773	-0.0294333	-0.0257454	-0.03258	-0.0332911	-0.0129677	-0.0117083	-0.0273918	0.00358935	-0.0205422	0.00160422	0.00286498	0.000973182	0
L-NR8	-0.115163	0.203958	0.0765458	0.105187	-0.027149	-0.00486122	0.0100256	-0.152509	-0.00501852	0.110995	-0.0873309	-0.0272302	0.032497	-0.0308245	0.00139832	0.056908	-0.0799681	0.0127751	0.119718	0.0980394	-0.227288	0.00186337	-0.138992	-0.0264892	0.0519106	-0.0352066	0.107678	-0.00431363	-0.058566	0.0268184	-0.0307217	0.0981471	0.0138336	-0.111455	0.0303451	0.0459598	0.0503624	-0.00255074	0.00713149	-0.00341053	0.0190983	-0.00700068	0.0085222	0.00163874	0.0194771	0.00133808	0.00210335	0
L-NOB1	-0.161169	0.190171	-0.0532716	-0.111178	0.0684606	-0.0581219	-0.208532	0.00768374	-0.0622225	-0.0956795	0.116504	0.0625149	0.026776	0.0788058	0.0744952	-0.0870289	0.021203	0.0045025	-0.0444736	0.0791051	-0.0175679	-0.0477424	0.0553774	0.0353694	0.0892527	0.035911	0.0352936	0.0473731	0.0983951	-0.0848648	0.0325964	0.108651	-0.100379	-0.104304	-0.0909455	0.0257782	0.0956165	-0.0312881	0.00843944	0.0109814	-0.00464984	-0.0175383	0.0147634	0.00916188	0.00064329	-0.0349943	-0.0130975	0
L-NOB2	-0.176585	0.184947	-0.0653548	-0.0449858	-0.207422	0.212337	0.0318287	0.0921331	0.0167582	0.120553	-0.0432432	0.0052334	0.0238831	0.0510324	-0.000452457	-0.000871018	-0.0490929	-0.0144563	0.0237744	-0.00970683	0.0202911	-0.0128175	0.071048	0.0878559	0.018453	-0.0339174	-0.0647661	0.0430388	0.107651	-0.0117784	0.129396	0.0535517	0.193648	-0.0686841	-0.00306963	-0.031993	-0.0050881	-0.0232494	-0.0384906	0.0223495	-0.0389488	0.00599534	0.00264599	0.00342161	-0.000630805	0.0010288	-0.00521963	0
L-NOB3	-0.169645	0.229681	-0.0616203	-0.103218	-0.077945	0.0260378	0.048595	-0.0449497	0.0495586	-0.0839958	-0.0540262	0.064085	0.0624871	0.00925323	-0.134286	0.148256	0.0692014	0.0594011	0.0452554	0.0587415	0.112452	0.00472897	-0.0571729	-0.0152112	-0.0471459	0.145296	-0.0840928	-0.133153	0.00578741	0.108936	0.0422718	0.029576	-0.138279	-0.0717515	0.0210168	-0.0679188	-0.00284559	0.0121566	0.0415173	0.00126351	-0.00679816	-0.00203822	-0.00968801	-0.000665483	0.00947481	0.00631096	-0.00217192	0
L-NOB4	-0.189706	0.145278	-0.0741825	-0.170691	0.112957	-0.104833	0.052796	0.0351606	0.0746935	-0.0204673	0.102537	-0.0579258	0.00517502	-0.0114836	-0.0467523	0.0812959	0.147252	-0.0348418	-0.0401263	-0.0535616	-0.133487	0.0882703	0.0347652	0.130232	-0.0913445	-0.196102	0.0742167	-0.0483108	-0.0337769	0.0333968	0.096912	-0.00525232	0.0225838	0.007271	0.0156313	-0.0314306	-0.0033676	0.0115485	-0.00773554	-0.00547004	0.033902	-0.0241457	-0.0105224	-0.00272017	0.00892824	0.0115003	0.00815029	0
L-NOB5	-0.180019	0.237012	-0.0684283	-0.126444	0.0411092	-0.0706791	0.139983	-0.0342967	-0.0858957	-0.0761723	-0.0117244	0.0447285	0.0889675	0.0315337	-0.00682035	-0.0339428	-0.000816739	-0.0107171	0.0746961	0.0299465	0.0987	-0.139945	-0.0467727	-0.149747	-0.0620641	-0.0868964	0.0447752	-0.0803702	0.0144393	-0.142263	-0.0727778	0.00518127	0.131947	0.0913083	0.00669453	0.0597853	-0.00364246	-0.0182723	0.00433733	0.00731162	-0.0152597	0.0399927	0.0105737	0.00630271	-0.0035747	-0.00428584	0.00812535	0
L-NOB6	-0.182235	0.193843	-0.065102	-0.148746	0.0299728	-0.0229949	0.0719293	-0.112161	0.0140484	0.0861532	0.00479757	0.0460621	0.00961607	-0.105061	-0.0998062	-0.136661	-0.0539513	-0.10068	-0.0146626	-0.0845279	-0.0253714	0.109098	0.0380859	0.104313	-0.00587615	0.136694	-0.0288441	0.0944329	0.0279029	0.0167857	-0.205989	-0.0195466	0.0137925	0.0121659	-0.0424747	0.00479638	-0.0324832	0.0181498	0.0114447	0.0427746	0.0184812	-0.00642539	-0.00597016	0.00603462	-0.00924339	0.00328017	0.00176363	0
L-NOB7	-0.169203	0.174813	-0.0409213	-0.113648	-0.154643	0.226794	0.0698343	0.0312551	0.00929254	0.0588233	0.0721338	-0.0172695	-0.053044	-0.0873687	0.12559	0.0359475	-0.0131557	0.0402899	-0.109593	0.0273252	0.000450001	-0.0344371	0.0109209	-0.0631267	0.0486967	-0.0817409	0.0646732	0.0471267	-0.0758114	-0.038183	-0.0499543	-0.0674095	-0.188993	0.0670588	0.0195284	0.0466377	-0.0242701	0.0373282	0.00886961	-0.0455436	0.00828884	-0.0149039	-0.0106494	-0.0034275	-0.00866539	-0.0110471	0.000406804	0
L-NOB8	-0.143631	0.231151	-0.0913855	-0.149879	0.107154	-0.0414141	-0.203172	0.105397	-0.0338572	-0.021911	-0.123628	-0.0553791	-0.145614	0.0716724	0.133082	0.0296579	-0.0600944	0.0332152	0.096574	-0.00860083	-0.0124085	0.0579114	-0.0601295	-0.0308841	0.00822251	0.0818495	-0.0465225	0.0387187	-0.0684134	0.0598319	0.0100243	-0.123795	0.0660568	0.0323257	0.0755099	0.0184435	-0.0381703	0.0199344	-0.0171743	-0.0385235	-0.00372886	0.00943995	0.0131348	-0.00867922	-0.00398492	0.0217291	0.00952294	0
eigvals	2.51072	1.04109	0.430052	0.377399	0.317816	0.298637	0.288266	0.275932	0.26837	0.264771	0.264533	0.259428	0.254082	0.249653	0.247985	0.244743	0.241153	0.235397	0.232878	0.227713	0.226963	0.22389	0.222254	0.220655	0.217201	0.214538	0.209847	0.208354	0.202725	0.200459	0.196212	0.193842	0.191889	0.190166	0.17202	0.167814	0.162129	0.157475	0.151546	0.147651	0.143137	0.136692	0.131629	0.118699	0.115105	0.113223	0.104373	0
% variation explained	18.9187	7.84481	3.24051	2.84376	2.3948	2.25028	2.17213	2.0792	2.02222	1.99509	1.9933	1.95483	1.91455	1.88118	1.86861	1.84418	1.81712	1.77376	1.75477	1.71585	1.7102	1.68705	1.67472	1.66267	1.63664	1.61658	1.58123	1.56998	1.52757	1.51049	1.47849	1.46063	1.44591	1.43293	1.2962	1.2645	1.22167	1.1866	1.14193	1.11257	1.07856	1.02999	0.991845	0.894419	0.867334	0.853152	0.786467	0

## Sheet: LEfSe_table.res
Biomarker	Logarithm value	Groups	LDA_value	p-value
k__Bacteria.p__Zixibacteria.c__Zixibacteria	2.03938			-
k__Bacteria.p__Firmicutes.c__Clostridia.o__Clostridia_UCG_014.f__Clostridia_UCG_014	4.42374	L-C	4.11229	2.86578e-07
k__Bacteria.p__Proteobacteria.c__Alphaproteobacteria.o__Rhizobiales	4.06243			6.98969e-08
k__Bacteria.p__Chloroflexi.Other.Other.Other.Other	2.32676			0.00920644
k__Bacteria.p__Proteobacteria.c__Gammaproteobacteria.o__CCM19a	0.623073			-
k__Bacteria.p__Dependentiae	2.67828			0.00373945
k__Bacteria.p__Firmicutes.c__Bacilli.o__Lactobacillales.f__Aerococcaceae.g__Aerococcus	0.933898			-
k__Bacteria.p__Actinobacteriota.c__Acidimicrobiia.o__Microtrichales.Other.Other	2.34815			0.00420679
k__Bacteria.p__Firmicutes.c__Negativicutes.o__Veillonellales_Selenomonadales.f__Selenomonadaceae.g__Quinella	1.33267			-
k__Bacteria.p__Firmicutes.c__Bacilli.o__Erysipelotrichales.f__Erysipelotrichaceae.g__Turicibacter	3.25618			1.96707e-06
k__Bacteria.p__Bacteroidota.c__Bacteroidia.o__Cytophagales.f__Microscillaceae	3.27387			4.78423e-07
k__Bacteria.p__Campilobacterota.c__Campylobacteria.o__Campylobacterales.f__Arcobacteraceae	2.89997			2.14363e-06
k__Bacteria.p__Patescibacteria.c__Parcubacteria	2.19904			0.046543
k__Bacteria.p__Actinobacteriota.c__Coriobacteriia.o__CG2_30_50_142	1.80474			-
k__Bacteria.p__Bacteroidota.c__Bacteroidia.Other.Other.Other	2.395			0.0192698
k__Bacteria.p__Proteobacteria.c__Gammaproteobacteria.o__Burkholderiales.f__Rhodocyclaceae.g__Georgfuchsia	0.623598			-
k__Bacteria.p__Bacteroidota.c__Bacteroidia.o__Cytophagales.f__Spirosomaceae.g__Runella	0.315895			-
k__Bacteria.p__Gemmatimonadota.c__BD2_11_terrestrial_group	2.76812			0.000694757
k__Bacteria.p__Bacteroidota.c__Bacteroidia	5.75008	L-C	5.44458	3.73488e-08
k__Bacteria.p__Bacteroidota.c__Bacteroidia.o__Sphingobacteriales.f__Lentimicrobiaceae	1.74875			-
k__Bacteria.p__Chloroflexi.c__Ktedonobacteria.o__Ktedonobacterales.f__Ktedonobacteraceae	2.20236			0.00577399
k__Bacteria.p__Firmicutes.c__Bacilli.o__Mycoplasmatales.f__Mycoplasmataceae.g__Mycoplasma	3.19421			4.30801e-06
k__Bacteria.p__Firmicutes.c__Bacilli.o__Erysipelotrichales.Other.Other	1.02735			0.0329924
k__Bacteria.p__Actinobacteriota.c__Actinobacteria.o__Propionibacteriales.f__Nocardioidaceae.g__Marmoricola	2.14198			0.0082378
k__Bacteria.p__Acidobacteriota.c__Subgroup_5.o__Subgroup_5	2.56735			0.0446818
k__Bacteria.p__Desulfobacterota.c__Desulfobaccia.o__Desulfobaccales.f__Desulfobaccaceae.g__Desulfobacca	1.27316			-
k__Bacteria.p__Bacteroidota.c__Bacteroidia.o__Flavobacteriales.f__Flavobacteriaceae.g__Capnocytophaga	2.7976			7.0743e-06
k__Bacteria.p__Proteobacteria.c__Gammaproteobacteria.o__Burkholderiales.Other.Other	2.49761			0.00135952
k__Bacteria.p__Proteobacteria.c__Alphaproteobacteria.o__Rhodobacterales.f__Rhodobacteraceae.Other	2.90573			3.25543e-06
k__Bacteria.p__Firmicutes.c__Clostridia.o__Oscillospirales.f__Ruminococcaceae.g__Negativibacillus	2.08919			-
k__Bacteria.p__Bacteroidota.c__Bacteroidia.o__Bacteroidales.f__Rikenellaceae	4.93757	S-C	4.63134	4.04014e-08
k__Bacteria.p__NB1_j.c__NB1_j	2.21128			-
k__Bacteria.p__Myxococcota.c__Polyangia.o__Polyangiales.f__Polyangiaceae	2.33008			0.0226361
k__Bacteria.p__Bacteroidota.c__Bacteroidia.o__Cytophagales	3.57455			2.69341e-07
k__Bacteria.p__Actinobacteriota.c__Actinobacteria.o__Catenulisporales.f__Catenulisporaceae.g__Catenulispora	2.45258			-
k__Bacteria.p__Marinimicrobia__SAR406_clade_.c__Marinimicrobia__SAR406_clade_.o__Marinimicrobia__SAR406_clade_.f__Marinimicrobia__SAR406_clade_.g__Marinimicrobia__SAR406_clade_	1.47533			-
k__Bacteria.p__Proteobacteria.c__Alphaproteobacteria.o__Micropepsales.f__Micropepsaceae.g__uncultured	3.28325			2.60514e-06
k__Bacteria.p__Cyanobacteria.c__Vampirivibrionia.o__Vampirovibrionales.f__Vampirovibrionaceae.g__Vampirovibrio	1.85405			-
k__Bacteria.p__Nitrospirota.c__Nitrospiria.o__Nitrospirales.f__Nitrospiraceae	3.04966			2.94843e-05
k__Bacteria.p__Proteobacteria.c__Gammaproteobacteria.o__Gammaproteobacteria_Incertae_Sedis.f__Unknown_Family.g__Candidatus_Berkiella	1.48278			-
k__Bacteria.p__Firmicutes.c__Clostridia.o__Clostridia.f__Hungateiclostridiaceae.Other	1.9824			0.00792646
k__Bacteria.p__Proteobacteria.c__Gammaproteobacteria.o__Burkholderiales.f__Rhodocyclaceae.g__uncultured	0.800106			-
k__Bacteria.p__Firmicutes.c__Bacilli.o__Lactobacillales.f__Carnobacteriaceae.g__Atopostipes	0.925763			0.00373826
k__Bacteria.p__Nitrospirota.c__Leptospirillia.o__Leptospirillales.f__Leptospirillaceae.g__Leptospirillum	1.90175			-
k__Bacteria.p__Proteobacteria.c__Gammaproteobacteria.o__Enterobacterales.f__Yersiniaceae.g__Rahnella1	1.81506			-
k__Bacteria.p__Bdellovibrionota.c__Bdellovibrionia.o__Bdellovibrionales.f__Bdellovibrionaceae.g__OM27_clade	2.28666			-
k__Bacteria.p__Actinobacteriota.c__Actinobacteria.o__Corynebacteriales.f__Dietziaceae.g__Dietzia	1.51982			0.031072
k__Bacteria.p__Verrucomicrobiota.c__Omnitrophia.o__Omnitrophales	1.49267			-
k__Bacteria.p__Proteobacteria.c__Alphaproteobacteria.o__Rhodobacterales.f__Rhodobacteraceae.g__Tabrizicola	2.29742			0.00124183
k__Bacteria.p__Desulfobacterota.c__Desulfobacteria	2.39156			0.000147593
k__Bacteria.p__Firmicutes.c__Clostridia.o__Oscillospirales.f__Oscillospiraceae.g__Papillibacter	1.93449			0.0271071
k__Bacteria.p__Actinobacteriota.c__Actinobacteria.o__Propionibacteriales.f__Nocardioidaceae.g__Flindersiella	0.310919			-
k__Bacteria.p__Firmicutes.c__Bacilli.o__Erysipelotrichales.f__Erysipelatoclostridiaceae.g__Catenibacterium	2.71714			0.0139265
k__Bacteria.p__Firmicutes.c__Clostridia.o__uncultured	3.03316			1.90849e-06
k__Bacteria.p__Spirochaetota.c__MVP_15	1.72568			-
k__Bacteria.p__Desulfobacterota.c__Desulfovibrionia.o__Desulfovibrionales.f__Desulfomicrobiaceae.g__Desulfomicrobium	1.47533			-
k__Bacteria.p__Proteobacteria.c__Gammaproteobacteria.o__CCM19a.f__CCM19a	0.623073			-
k__Bacteria.p__Proteobacteria.c__Alphaproteobacteria.o__Tistrellales.f__Geminicoccaceae.g__Candidatus_Alysiosphaera	1.20648			-
k__Bacteria.p__Zixibacteria.c__Zixibacteria.o__Zixibacteria	2.03938			-
k__Bacteria.p__Firmicutes.c__Bacilli.o__Alicyclobacillales.f__Alicyclobacillaceae	1.89157			-
k__Bacteria.p__FCPU426	1.80344			-
k__Bacteria.p__Firmicutes.c__Bacilli.o__Mycoplasmatales.f__Mycoplasmataceae.g__Ureaplasma	1.28522			-
k__Bacteria.p__Bacteroidota.c__Bacteroidia.o__Chitinophagales.f__Saprospiraceae.Other	1.6931			-
k__Bacteria.p__Entotheonellaeota.c__Entotheonellia.o__Entotheonellales.f__Entotheonellaceae.g__Entotheonellaceae	1.86246			-
k__Bacteria.p__Proteobacteria.c__Gammaproteobacteria.o__Nitrosococcales.f__Nitrosococcaceae	2.38111			0.000665122
k__Bacteria.p__Proteobacteria.c__Gammaproteobacteria.o__Burkholderiales.f__Burkholderiaceae	3.99035			8.22929e-07
k__Bacteria.p__Desulfobacterota.c__Desulfuromonadia.o__Geobacterales	2.12589			-
k__Bacteria.p__Firmicutes.c__Clostridia.o__Oscillospirales.f___Clostridium__methylpentosum_group	2.34005			0.000853797
k__Bacteria.p__Actinobacteriota.c__Actinobacteria.o__Corynebacteriales.f__Nocardiaceae	2.82494			2.82206e-07
k__Bacteria.p__Firmicutes.c__Clostridia.o__Thermincolales.f__Thermincolaceae	1.86329			-
k__Bacteria.p__Proteobacteria.c__Gammaproteobacteria.o__Salinisphaerales.f__Solimonadaceae.g__Nevskia	2.54004			0.000670608
k__Bacteria.p__Proteobacteria.c__Gammaproteobacteria.o__Salinisphaerales.f__Salinisphaeraceae	1.81768			-
k__Bacteria.p__Proteobacteria.c__Alphaproteobacteria.o__Sphingomonadales	4.33826	S-Anti	4.02962	3.12384e-07
k__Bacteria.p__Proteobacteria.c__Gammaproteobacteria.o__Xanthomonadales.f__Xanthomonadaceae.g__Pseudoxanthomonas	2.617			0.0300312
k__Bacteria.p__Patescibacteria.c__Parcubacteria.o__Parcubacteria.f__Parcubacteria	1.6843			-
k__Bacteria.p__Desulfobacterota.c__Desulfobaccia	1.27316			-
k__Bacteria.p__Proteobacteria.c__Gammaproteobacteria.o__Alteromonadales.f__Pseudoalteromonadaceae.g__Pseudoalteromonas	2.6914			0.000129175
k__Bacteria.p__Gemmatimonadota.c__Longimicrobia.o__Longimicrobiales.f__Longimicrobiaceae.g__YC_ZSS_LKJ147	2.40488			-
k__Bacteria.p__Bacteroidota.c__Bacteroidia.o__Bacteroidales.f__Prevotellaceae.g__Prevotellaceae_Ga6A1_group	2.48027			0.0124494
k__Bacteria.p__Actinobacteriota.c__Coriobacteriia.o__Coriobacteriales.f__Eggerthellaceae.g__uncultured	1.4023			0.0451259
k__Bacteria.p__Desulfobacterota.c__Syntrophorhabdia	0.61704			-
k__Bacteria.p__Campilobacterota.c__Campylobacteria.o__Campylobacterales.f__Helicobacteraceae	3.32155			9.7496e-06
k__Bacteria.p__Bacteroidota.c__Bacteroidia.o__Bacteroidales.f__Bacteroidales_UCG_001	1.87793			0.0329924
k__Bacteria.p__Firmicutes.c__Clostridia.o__Oscillospirales.f__Oscillospiraceae.g__Colidextribacter	4.59135	S-C	4.27701	2.43793e-05
k__Bacteria.Other.Other.Other.Other	3.86091			5.96084e-08
k__Bacteria.p__Acidobacteriota.c__Subgroup_25.o__Subgroup_25.f__Subgroup_25.g__Subgroup_25	2.31613			-
k__Bacteria.p__Firmicutes.c__Clostridia.o__Thermincolales.f__Thermincolaceae.g__Thermincola	1.86329			-
k__Bacteria.p__Proteobacteria.c__Alphaproteobacteria.o__Rhizobiales.f__Beijerinckiaceae.g__Methylobacterium_Methylorubrum	2.37218			0.00565878
k__Bacteria.p__Bacteroidota.c__Bacteroidia.o__Bacteroidales.Other	4.27277			2.84838e-08
k__Bacteria.p__Bacteroidota.c__Bacteroidia.Other.Other	2.395			0.0192698
k__Bacteria.p__Bacteroidota.c__Bacteroidia.o__Bacteroidetes_VC2_1_Bac22.f__Bacteroidetes_VC2_1_Bac22	1.32791			-
k__Bacteria.p__Firmicutes.c__Negativicutes.o__Veillonellales_Selenomonadales.f__Veillonellaceae.g__Dialister	3.34663			3.79346e-06
k__Bacteria.p__Bacteroidota.c__Bacteroidia.o__Bacteroidales.f__Prolixibacteraceae.g__Sunxiuqinia	0.307527			-
k__Bacteria	6			-
k__Bacteria.p__Proteobacteria.c__Gammaproteobacteria.o__Chromatiales.f__Chromatiaceae	1.43052			-
k__Bacteria.p__Desulfobacterota.c__Desulfuromonadia.o__MA_28_I98C	1.81433			-
k__Bacteria.p__Proteobacteria.c__Gammaproteobacteria.o__Burkholderiales.f__Gallionellaceae.g__Candidatus_Nitrotoga	0.373692			-
k__Bacteria.p__Proteobacteria.c__Alphaproteobacteria.o__Rhizobiales.f__Xanthobacteraceae.g__uncultured	3.14348			3.82914e-06
k__Bacteria.p__Firmicutes.c__Clostridia.o__Lachnospirales.f__Lachnospiraceae.g__Sellimonas	0.796369			-
k__Bacteria.p__Proteobacteria.c__Alphaproteobacteria.o__Caulobacterales.f__Hyphomonadaceae.g__uncultured	0.590953			-
k__Bacteria.p__Bacteroidota.c__Bacteroidia.o__Chitinophagales.f__Chitinophagaceae	3.47243			1.15272e-06
k__Bacteria.Other.Other.Other.Other.Other	3.86091			5.96084e-08
k__Bacteria.p__Desulfobacterota.Other.Other.Other.Other	1.48764			-
k__Bacteria.p__Firmicutes.c__Bacilli.o__Erysipelotrichales.f__Erysipelotrichaceae.g__Dielma	1.28691			-
k__Bacteria.p__Desulfobacterota.c__Desulfobacteria.o__Desulfobacterales.f__Desulfosarcinaceae.Other	1.75282			0.0451259
k__Bacteria.p__Myxococcota.c__Polyangia.o__Polyangiales.f__Sandaracinaceae	2.36345			-
k__Bacteria.p__Bacteroidota.c__Bacteroidia.o__Bacteroidales.f__Barnesiellaceae	3.01163			2.96174e-05
k__Bacteria.p__Patescibacteria.c__Gracilibacteria	2.57628			6.92514e-05
k__Bacteria.p__Actinobacteriota.c__Acidimicrobiia.o__Microtrichales.f__uncultured.g__uncultured	2.80261			0.00092227
k__Bacteria.p__Verrucomicrobiota.c__Lentisphaeria.o__Oligosphaerales.f__Lenti_02	1.57897			-
k__Bacteria.p__Bacteroidota.c__SJA_28.o__SJA_28.f__SJA_28.g__SJA_28	1.6337			-
k__Bacteria.p__Spirochaetota.c__Leptospirae.o__Leptospirales	1.71126			-
k__Bacteria.p__Proteobacteria.c__Gammaproteobacteria.o__Burkholderiales.f__Comamonadaceae.g__Rivibacter	1.57185			-
k__Bacteria.p__Actinobacteriota.c__Thermoleophilia.o__Solirubrobacterales.Other	2.43199			0.0367908
k__Bacteria.p__Acidobacteriota.c__Aminicenantia.o__Aminicenantales.f__Aminicenantales.g__Aminicenantales	1.91695			-
k__Bacteria.p__Patescibacteria	2.96			9.71418e-07
k__Bacteria.p__Actinobacteriota.c__Actinobacteria.o__Micrococcales	3.74983			2.40308e-07
k__Bacteria.p__Desulfobacterota.Other	1.48764			-
k__Bacteria.p__Firmicutes.c__Clostridia.o__Peptococcales.f__Peptococcaceae.g__Peptococcaceae	0.963443			-
k__Bacteria.p__Acidobacteriota.c__Acidobacteriae.o__Acidobacteriae.f__Acidobacteriae	1.8165			-
k__Bacteria.p__Bacteroidota.c__Kryptonia.o__Kryptoniales	2.34883			0.0201033
k__Bacteria.p__Bacteroidota.c__Bacteroidia.o__Chitinophagales.f__Chitinophagaceae.g__Taibaiella	2.2144			-
k__Bacteria.p__Actinobacteriota.c__Actinobacteria.o__Euzebyales	2.57665			0.0315332
k__Bacteria.p__Myxococcota.c__Polyangia.o__mle1_27.f__mle1_27.g__mle1_27	2.01432			-
k__Bacteria.p__Proteobacteria.c__Gammaproteobacteria.o__Xanthomonadales.f__Xanthomonadaceae.g__Lysobacter	3.01795			6.79271e-06
k__Bacteria.p__Proteobacteria.c__Gammaproteobacteria.o__Burkholderiales.f__Gallionellaceae	1.47282			-
k__Bacteria.p__Proteobacteria.c__Gammaproteobacteria.o__R7C24.f__R7C24.g__R7C24	2.44832			-
k__Bacteria.p__Proteobacteria.c__Gammaproteobacteria.o__Salinisphaerales.f__Solimonadaceae.g__Polycyclovorans	1.88478			-
k__Bacteria.p__Actinobacteriota.c__Acidimicrobiia.Other.Other	3.43686			1.70743e-06
k__Bacteria.p__Bacteroidota.c__Bacteroidia.o__Chitinophagales.f__Chitinophagaceae.g__Parasegetibacter	1.41509			-
k__Bacteria.p__MBNT15	2.32039			0.0466515
k__Bacteria.p__Myxococcota.c__Polyangia.o__MidBa8	1.53798			-
k__Bacteria.p__Proteobacteria.c__Alphaproteobacteria.o__Sphingomonadales.f__Sphingomonadaceae.g__Erythrobacter	1.91477			-
k__Bacteria.p__Chloroflexi.c__Anaerolineae.Other	1.72426			-
k__Bacteria.p__Proteobacteria.c__Gammaproteobacteria.o__Pseudomonadales.f__Moraxellaceae.g__Acinetobacter	3.86846			1.08335e-06
k__Bacteria.p__Desulfobacterota.c__Desulfobacteria.o__Desulfobacterales.f__Desulfobacteraceae.Other	0.975752			-
k__Bacteria.p__Bacteroidota.c__Bacteroidia.o__Flavobacteriales.f__Flavobacteriaceae.g__Ulvibacter	1.33098			-
k__Bacteria.p__Bacteroidota.c__Bacteroidia.o__Sphingobacteriales.f__Sphingobacteriaceae.g__Mucilaginibacter	2.87766			3.25196e-05
k__Bacteria.p__Proteobacteria.c__Gammaproteobacteria.o__Enterobacterales.f__Yersiniaceae.g__Serratia	3.14459			1.79788e-05
k__Bacteria.p__Dependentiae.c__Babeliae	2.67828			0.00373945
k__Bacteria.p__Deferribacterota	3.56775			5.68499e-06
k__Bacteria.p__Proteobacteria.c__Alphaproteobacteria.o__Sphingomonadales.f__Sphingomonadaceae.g__Novosphingobium	2.85605			0.000110724
k__Bacteria.p__Proteobacteria.c__Alphaproteobacteria.o__Rhodobacterales.f__Rhodobacteraceae.g__uncultured	1.71288			-
k__Bacteria.p__Proteobacteria.c__Gammaproteobacteria.o__Burkholderiales.f__Comamonadaceae.Other	3.32117			6.14821e-07
k__Bacteria.p__Myxococcota.c__Polyangia.o__Nannocystales.f__Nannocystaceae.g__Nannocystis	1.83147			-
k__Bacteria.p__Firmicutes.c__Negativicutes.o__Veillonellales_Selenomonadales.f__Sporomusaceae.g__Pelosinus	1.62975			-
k__Bacteria.p__Proteobacteria.c__Alphaproteobacteria.o__SAR11_clade.f__Clade_I	3.60112			3.22694e-07
k__Bacteria.p__Actinobacteriota.c__Actinobacteria.o__Frankiales.f__Sporichthyaceae.g__Sporichthya	1.51982			-
k__Bacteria.p__Desulfobacterota.c__Syntrophorhabdia.o__Syntrophorhabdales.f__Syntrophorhabdaceae.g__Syntrophorhabdus	0.61704			-
k__Bacteria.p__Actinobacteriota.c__Thermoleophilia.o__Solirubrobacterales.f__Solirubrobacteraceae.g__Solirubrobacter	2.5183			-
k__Bacteria.p__Bacteroidota.c__Bacteroidia.o__Cytophagales.f__Amoebophilaceae.g__uncultured	1.44056			-
k__Bacteria.Other.Other.Other	3.86091			5.96084e-08
k__Bacteria.p__Proteobacteria.c__Gammaproteobacteria.o__B2M28.f__B2M28.g__B2M28	1.43656			-
k__Bacteria.p__Actinobacteriota.c__Coriobacteriia.o__Coriobacteriales.f__Eggerthellaceae.g__Eggerthella	2.08392			-
k__Bacteria.p__Proteobacteria.c__Gammaproteobacteria.o__Enterobacterales.f__Enterobacteriaceae.Other	3.46079			8.83174e-08
k__Bacteria.p__Entotheonellaeota	2.07965			-
k__Bacteria.p__Firmicutes.c__D8A_2.o__D8A_2.f__D8A_2.g__D8A_2	1.83124			-
k__Bacteria.p__Proteobacteria.c__Gammaproteobacteria.o__Burkholderiales.f__Oxalobacteraceae.Other	2.66637			0.00275082
k__Bacteria.p__Proteobacteria.c__Alphaproteobacteria.o__Rhodobacterales.f__Rhodobacteraceae.g__Amaricoccus	1.72235			-
k__Bacteria.p__Bacteroidota.c__Bacteroidia.o__Flavobacteriales.f__Flavobacteriaceae.g__NS5_marine_group	1.83883			-
k__Bacteria.p__Bacteroidota.c__Bacteroidia.o__Bacteroidales.f__p_251_o5.g__p_251_o5	1.97447			0.0368029
k__Bacteria.p__Proteobacteria.c__Alphaproteobacteria.o__Acetobacterales.f__Acetobacteraceae.g__uncultured	2.42369			-
k__Bacteria.p__Firmicutes.c__Clostridia.o__Oscillospirales.f__Oscillospiraceae.g__uncultured	4.59829	S-C	4.31326	1.77844e-05
k__Bacteria.p__Proteobacteria.c__Alphaproteobacteria.o__Rickettsiales.f__Rickettsiales.g__Candidatus_Jidaibacter	1.70391			-
k__Bacteria.p__Actinobacteriota.c__Coriobacteriia.o__Coriobacteriales.f__Coriobacteriaceae	3.32039			4.01334e-06
k__Bacteria.p__Actinobacteriota.c__Actinobacteria.o__Corynebacteriales	3.52222			2.06561e-07
k__Bacteria.p__Cyanobacteria.c__Sericytochromatia.o__Sericytochromatia	2.24013			-
k__Bacteria.p__Proteobacteria.c__Alphaproteobacteria.o__Rhodobacterales.f__Rhodobacteraceae	3.80085			1.04524e-06
k__Bacteria.p__Acidobacteriota.c__Vicinamibacteria.o__Vicinamibacterales.f__Vicinamibacteraceae	1.91245			-
k__Bacteria.p__Myxococcota.c__Polyangia.o__MidBa8.f__MidBa8	1.53798			-
k__Bacteria.p__Bacteroidota.c__Bacteroidia.o__Chitinophagales.Other.Other	1.62877			-
k__Bacteria.p__Firmicutes.c__Clostridia.o__Oscillospirales.f__Ruminococcaceae.g__Paludicola	1.74987			-
k__Bacteria.p__Proteobacteria.c__Alphaproteobacteria.o__Rhizobiales.f__Xanthobacteraceae.g__Pseudorhodoplanes	2.06907			-
k__Bacteria.p__Proteobacteria.c__Gammaproteobacteria.o__Xanthomonadales.f__Rhodanobacteraceae	4.0604			1.58166e-07
k__Bacteria.p__Proteobacteria.c__Gammaproteobacteria.o__Nitrosococcales.f__Nitrosococcaceae.g__SZB85	1.938			0.00792646
k__Bacteria.p__Desulfobacterota.c__Desulfuromonadia.o__Sva1033.f__Sva1033	1.9748			0.0478705
k__Bacteria.p__Nitrospirota.c__Nitrospiria.o__Nitrospirales	3.04966			2.94843e-05
k__Bacteria.p__Proteobacteria.c__Gammaproteobacteria.o__Gammaproteobacteria_Incertae_Sedis.f__Unknown_Family	3.11508			1.08565e-06
k__Bacteria.p__Actinobacteriota.c__Actinobacteria.o__Euzebyales.f__Euzebyaceae.g__uncultured	2.57665			0.0315332
k__Bacteria.p__Chloroflexi.c__Ktedonobacteria.o__C0119.f__C0119.g__C0119	2.43052			-
k__Bacteria.p__Acidobacteriota.c__Acidobacteriae.o__Subgroup_13.f__Subgroup_13.g__Subgroup_13	1.56816			-
k__Bacteria.p__Actinobacteriota.c__Thermoleophilia.o__uncultured	1.88999			-
k__Bacteria.p__Proteobacteria.c__Alphaproteobacteria.o__Rickettsiales.f__Rickettsiaceae	1.79597			-
k__Bacteria.p__Proteobacteria.c__Gammaproteobacteria.o__Burkholderiales.f__Nitrosomonadaceae.g__mle1_7	2.2568			0.0117292
k__Bacteria.p__Bacteroidota.c__Bacteroidia.o__Cytophagales.f__Microscillaceae.g__Chryseolinea	2.30109			0.0455681
k__Bacteria.p__Bacteroidota.c__Bacteroidia.o__Bacteroidales.f__Bacteroidaceae.g__Bacteroides	5.04412	S-C	4.74573	9.43302e-08
k__Bacteria.p__Fusobacteriota.c__Fusobacteriia.o__Fusobacteriales.f__Fusobacteriaceae.g__Fusobacterium	3.70933			4.65097e-07
k__Bacteria.p__Acidobacteriota.c__Subgroup_5.o__Subgroup_5.f__Subgroup_5	2.56735			0.0446818
k__Bacteria.p__Bdellovibrionota.c__Bdellovibrionia.o__Bacteriovoracales.f__Bacteriovoracaceae.Other	1.85518			-
k__Bacteria.p__Firmicutes.c__Clostridia.o__Peptostreptococcales_Tissierellales	5.41887	L-NR	5.09901	1.00155e-07
k__Bacteria.p__Firmicutes.c__Clostridia.o__Oscillospirales	5.23425	L-NR	4.76556	0.0166891
k__Bacteria.p__Proteobacteria.c__Gammaproteobacteria.o__JTB23.f__JTB23.g__JTB23	0.311274			-
k__Bacteria.p__Firmicutes.c__Clostridia.o__Clostridia_vadinBB60_group.f__Clostridia_vadinBB60_group	3.79542			1.02397e-06
k__Bacteria.p__Proteobacteria.c__Alphaproteobacteria.o__Micavibrionales	2.30777			-
k__Bacteria.p__Cyanobacteria.c__Sericytochromatia.o__Sericytochromatia.f__Sericytochromatia	2.24013			-
k__Bacteria.p__Proteobacteria.c__Alphaproteobacteria.o__Rhodobacterales.f__Rhodobacteraceae.g__Ascidiaceihabitans	0.598916			-
k__Bacteria.p__Actinobacteriota.c__Actinobacteria.o__Frankiales.f__Frankiaceae.g__Frankia	0.322568			-
k__Bacteria.p__Spirochaetota.c__MVP_15.o__MVP_15.f__MVP_15	1.72568			-
k__Bacteria.p__Bacteroidota.c__Bacteroidia.o__Flavobacteriales.f__Flavobacteriaceae.g__Maritimimonas	1.31658			-
k__Bacteria.p__Proteobacteria.c__Gammaproteobacteria.o__Burkholderiales.f__Methylophilaceae	2.70974			0.000240259
k__Bacteria.p__Proteobacteria.c__Alphaproteobacteria.o__Rhizobiales.f__Xanthobacteraceae.g__Afipia	2.30876			-
k__Bacteria.p__Proteobacteria.c__Gammaproteobacteria.o__Vibrionales	3.64795			2.05173e-06
k__Bacteria.p__Firmicutes.c__Clostridia.o__Clostridia_vadinBB60_group.f__Clostridia_vadinBB60_group.g__Clostridia_vadinBB60_group	3.79542			1.02397e-06
k__Bacteria.p__Firmicutes.c__Clostridia.o__Lachnospirales.f__Defluviitaleaceae.g__Defluviitaleaceae_UCG_011	3.92041			0.00863371
k__Bacteria.p__LCP_89.c__LCP_89.o__LCP_89.f__LCP_89.g__LCP_89	1.31289			-
k__Bacteria.p__Firmicutes.c__Clostridia.o__Lachnospirales.f__Lachnospiraceae.g___Eubacterium__eligens_group	3.31251			2.88192e-06
k__Bacteria.p__Firmicutes.c__Bacilli.o__RF39	2.01199			0.0203729
k__Bacteria.p__Desulfobacterota.c__Desulfobacteria.o__Desulfatiglandales.f__Desulfatiglandaceae.g__Desulfatiglans	1.659			-
k__Bacteria.p__Desulfobacterota	4.52401	S-C	4.22505	6.37862e-08
k__Bacteria.p__Proteobacteria.c__Gammaproteobacteria.o__Pasteurellales.f__Pasteurellaceae.g__Rodentibacter	2.04112			-
k__Bacteria.p__Actinobacteriota.c__Actinobacteria.o__Frankiales.f__uncultured.g__uncultured	2.26703			0.00531422
k__Bacteria.p__Armatimonadota.c__Fimbriimonadia	1.76931			-
k__Bacteria.p__Proteobacteria.c__Alphaproteobacteria.o__Rhodobacterales.f__Rhodobacteraceae.g__Shimia	2.53419			0.0289999
k__Bacteria.p__Planctomycetota.c__Pla4_lineage.o__Pla4_lineage.f__Pla4_lineage	0.850814			-
k__Bacteria.p__Bacteroidota.c__Bacteroidia.o__Chitinophagales.f__Chitinophagaceae.g__UTBCD1	1.8672			-
k__Bacteria.p__Bacteroidota.c__Bacteroidia.o__Chitinophagales.f__Chitinophagaceae.g__Chitinophaga	2.59645			0.00750758
k__Bacteria.p__Desulfobacterota.Other.Other	1.48764			-
k__Bacteria.p__Desulfobacterota.c__Desulfobulbia.o__Desulfobulbales.f__Desulfobulbaceae	2.06308			0.0159986
k__Bacteria.p__Bacteroidota.c__Bacteroidia.o__Sphingobacteriales.f__Sphingobacteriaceae.g__Parapedobacter	1.79506			-
k__Bacteria.p__Bacteroidota.c__Bacteroidia.o__Bacteroidales.f__Prolixibacteraceae.g__Draconibacterium	1.98459			-
k__Bacteria.p__Proteobacteria.c__Alphaproteobacteria.o__Rhizobiales.f__KF_JG30_B3	2.12775			-
k__Bacteria.p__Bacteroidota.c__Bacteroidia.o__Cytophagales.f__Cytophagaceae.g__Cytophaga	1.81006			-
k__Bacteria.p__Actinobacteriota.c__Actinobacteria.o__Frankiales.f__Geodermatophilaceae.g__Modestobacter	1.98494			-
k__Bacteria.p__Proteobacteria.c__Alphaproteobacteria.o__Acetobacterales	3.10638			2.02077e-06
k__Bacteria.p__Bacteroidota.c__Bacteroidia.o__Bacteroidales.f__Muribaculaceae	5.62725	L-C	5.32924	2.81464e-08
k__Bacteria.p__Bacteroidota.c__Bacteroidia.o__Cytophagales.f__Spirosomaceae.g__Arcicella	1.74426			-
k__Bacteria.p__Firmicutes.c__Bacilli.o__Lactobacillales.f__Leuconostocaceae.g__Weissella	3.15724			2.24791e-05
k__Bacteria.p__Bacteroidota.c__Bacteroidia.o__Bacteroidales.f__Bacteroidales_BS11_gut_group.g__Bacteroidales_BS11_gut_group	1.78867			-
k__Bacteria.p__Proteobacteria.c__Alphaproteobacteria.o__Caulobacterales.f__Caulobacteraceae.Other	1.51497			-
k__Bacteria.p__Verrucomicrobiota.c__Verrucomicrobiae.o__Verrucomicrobiales	1.67462			-
k__Bacteria.p__Spirochaetota.c__Spirochaetia.o__Spirochaetales	3.17484			1.73983e-07
k__Bacteria.p__Bacteroidota.c__Bacteroidia.o__Flavobacteriales.f__NS7_marine_group.g__NS7_marine_group	1.60414			-
k__Bacteria.p__Proteobacteria.c__Alphaproteobacteria.o__uncultured.f__uncultured.g__uncultured	2.99955			2.09609e-06
k__Bacteria.p__Proteobacteria.c__Alphaproteobacteria.o__SAR11_clade.f__Clade_I.g__Clade_Ia	3.5959			3.00621e-07
k__Bacteria.p__Proteobacteria.c__Gammaproteobacteria.o__SAR86_clade	1.82774			0.0144064
k__Bacteria.p__Actinobacteriota.c__Acidimicrobiia.o__Microtrichales.f__Iamiaceae.g__Iamia	2.75341			0.000234259
k__Bacteria.p__Proteobacteria.c__Alphaproteobacteria.o__Elsterales.f__uncultured.g__uncultured	2.7967			1.44684e-05
k__Bacteria.p__Actinobacteriota.c__Thermoleophilia.o__Solirubrobacterales.f__Solirubrobacteraceae	2.90996			0.00326648
k__Bacteria.p__Proteobacteria.c__Alphaproteobacteria.o__Rhodobacterales.f__Rhodobacteraceae.g__Rhodovulum	0.838504			-
k__Bacteria.p__Actinobacteriota	4.70708	S-NOB	4.397	3.24414e-07
k__Bacteria.p__Desulfobacterota.c__Desulfobulbia.o__Desulfobulbales.f__Desulfocapsaceae.Other	1.7166			-
k__Bacteria.p__Fusobacteriota.c__Fusobacteriia.o__Fusobacteriales.f__Fusobacteriaceae.g__Cetobacterium	2.73625			-
k__Bacteria.p__Firmicutes.c__Clostridia.o__Oscillospirales.f__Ruminococcaceae.g__Subdoligranulum	3.42768			1.08399e-06
k__Bacteria.p__Proteobacteria.c__Gammaproteobacteria.o__Oceanospirillales.f__Nitrincolaceae.g__Marinobacterium	1.76608			-
k__Bacteria.p__Actinobacteriota.c__Rubrobacteria.o__Rubrobacterales.f__Rubrobacteriaceae.g__Rubrobacter	3.06972			2.52608e-05
k__Bacteria.p__Myxococcota.c__Polyangia.Other	1.97273			-
k__Bacteria.p__Acidobacteriota.c__Holophagae.o__Subgroup_7.f__Subgroup_7	3.12022			2.92532e-06
k__Bacteria.p__Cyanobacteria.c__Sericytochromatia	2.24013			-
k__Bacteria.p__Actinobacteriota.c__MB_A2_108	3.28427			3.52345e-06
k__Bacteria.p__Gemmatimonadota.c__BD2_11_terrestrial_group.o__BD2_11_terrestrial_group	2.76812			0.000694757
k__Bacteria.p__Proteobacteria.c__Gammaproteobacteria.o__Burkholderiales.f__Sutterellaceae.g__uncultured	2.79214			7.49947e-06
k__Bacteria.p__Cyanobacteria.c__Cyanobacteriia.o__Leptolyngbyales.f__Leptolyngbyaceae	1.95239			-
k__Bacteria.p__Proteobacteria.c__Gammaproteobacteria.o__Aeromonadales.f__Aeromonadaceae.g__Tolumonas	1.43414			-
k__Bacteria.p__Proteobacteria.c__Gammaproteobacteria.o__Xanthomonadales.f__Rhodanobacteraceae.g__Chujaibacter	2.90473			0.00276489
k__Bacteria.p__Bacteroidota.c__SJA_28.o__SJA_28.f__SJA_28	1.6337			-
k__Bacteria.p__Proteobacteria.c__Gammaproteobacteria.o__Enterobacterales.f__Morganellaceae.g__Moellerella	1.73865			-
k__Bacteria.p__Proteobacteria.c__Gammaproteobacteria.o__Burkholderiales.f__Comamonadaceae.g__Delftia	1.30501			-
k__Bacteria.p__Elusimicrobiota.c__Elusimicrobia.o__MVP_88.f__MVP_88.g__MVP_88	1.94221			-
k__Bacteria.p__Deinococcota.c__Deinococci.o__Deinococcales.f__Deinococcaceae	1.64995			-
k__Bacteria.p__Bacteroidota.c__Bacteroidia.o__Chitinophagales.f__Chitinophagaceae.g__Aurantisolimonas	2.11404			-
k__Bacteria.p__Latescibacterota.c__Latescibacteria.o__Latescibacterales.f__Latescibacteraceae.g__Latescibacteraceae	1.74905			-
k__Bacteria.p__Acidobacteriota.c__Acidobacteriae.o__Subgroup_15.f__Subgroup_15.g__Subgroup_15	1.63511			-
k__Bacteria.p__Nitrospirota.c__Thermodesulfovibrionia.o__uncultured	1.82974			-
k__Bacteria.p__Firmicutes.c__Clostridia.o__Peptostreptococcales_Tissierellales.f__Fusibacteraceae.g__Fusibacter	0.63661			-
k__Bacteria.p__Firmicutes.c__Clostridia.o__Clostridia_UCG_014	4.42374	L-C	4.11229	2.86578e-07
k__Bacteria.p__Proteobacteria.c__Gammaproteobacteria.o__Aeromonadales.f__Succinivibrionaceae.g__Succinivibrio	3.14503			4.54727e-06
k__Bacteria.p__Acidobacteriota.c__Subgroup_22.o__Subgroup_22.f__Subgroup_22	2.62808			0.00734574
k__Bacteria.p__Firmicutes.c__Clostridia.o__Lachnospirales.f__Lachnospiraceae.g__Stomatobaculum	1.50751			-
k__Bacteria.p__Acidobacteriota.c__Subgroup_25.o__Subgroup_25	2.31613			-
k__Bacteria.p__RCP2_54.c__RCP2_54.o__RCP2_54.f__RCP2_54.g__RCP2_54	2.64464			0.000300961
k__Bacteria.p__NB1_j.c__NB1_j.o__NB1_j	2.21128			-
k__Bacteria.p__Verrucomicrobiota.c__Chlamydiae	2.36128			0.00560026
k__Bacteria.p__Firmicutes.c__Bacilli.o__Staphylococcales.f__Staphylococcaceae.g__Jeotgalicoccus	1.50374			-
k__Bacteria.p__Actinobacteriota.c__Thermoleophilia.o__Solirubrobacterales.f__Solirubrobacteraceae.g__Parviterribacter	1.82604			-
k__Bacteria.p__Firmicutes.c__Clostridia.o__Peptostreptococcales_Tissierellales.f__Anaerovoracaceae.g__Anaerovorax	2.45035			0.00013309
k__Bacteria.p__Bacteroidota.c__Bacteroidia.o__Sphingobacteriales.f__NS11_12_marine_group	2.41375			0.0154851
k__Bacteria.p__Calditrichota	1.22201			-
k__Bacteria.p__Bacteroidota.c__Bacteroidia.o__Flavobacteriales.f__NS9_marine_group.g__NS9_marine_group	1.74009			-
k__Bacteria.p__Actinobacteriota.c__Actinobacteria.o__Glycomycetales.f__Glycomycetaceae.g__Glycomyces	2.21866			-
k__Bacteria.p__Firmicutes.c__Clostridia.o__Lachnospirales.f__Lachnospiraceae.g___Eubacterium__xylanophilum_group	3.08951			1.19072e-06
k__Bacteria.p__Myxococcota.c__Polyangia.o__Nannocystales.f__Nannocystaceae.g__Pseudenhygromyxa	2.02154			-
k__Bacteria.p__Acidobacteriota.c__Acidobacteriae.o__Acidobacteriales.f__uncultured	3.30171			6.12366e-06
k__Bacteria.p__Actinobacteriota.c__Actinobacteria.o__Frankiales.f__Geodermatophilaceae.g__Geodermatophilus	1.84757			-
k__Bacteria.p__Firmicutes.c__Clostridia.o__Lachnospirales.f__Lachnospiraceae.g__Lachnospiraceae_UCG_010	2.5118			0.0497955
k__Bacteria.p__Proteobacteria.c__Gammaproteobacteria.o__Cellvibrionales.f__Cellvibrionaceae.g__uncultured	2.86986			6.06804e-06
k__Bacteria.p__Proteobacteria.c__Alphaproteobacteria.o__Rhizobiales.f__Rhodobiaceae.g__Afifella	1.73867			-
k__Bacteria.p__Proteobacteria.c__Gammaproteobacteria.o__Burkholderiales.f__Chromobacteriaceae.g__Pseudogulbenkiania	0.774404			-
k__Bacteria.p__Bacteroidota.c__Bacteroidia.o__Bacteroidales.f__Tannerellaceae.g__Parabacteroides	3.77983			6.11778e-07
k__Bacteria.p__Firmicutes.c__Clostridia.o__Oscillospirales.f__Ruminococcaceae.g__Candidatus_Soleaferrea	2.46376			0.000215776
k__Bacteria.p__Proteobacteria.c__Gammaproteobacteria.o__uncultured.f__uncultured	1.86352			-
k__Bacteria.p__Bacteroidota.c__Bacteroidia.o__Bacteroidales.f__Marinifilaceae.g__Butyricimonas	4.23509			5.99281e-08
k__Bacteria.p__Proteobacteria.c__Alphaproteobacteria.o__Micavibrionales.f__uncultured	2.2061			-
k__Bacteria.p__Actinobacteriota.c__Coriobacteriia.o__OPB41	0.755443			-
k__Bacteria.p__Proteobacteria.c__Gammaproteobacteria.o__uncultured.f__uncultured.g__uncultured	1.86352			-
k__Bacteria.p__Firmicutes.c__Clostridia.o__Lachnospirales.Other.Other	2.83985			0.00078073
k__Bacteria.p__Bacteroidota.c__Bacteroidia.o__Cytophagales.f__Spirosomaceae.g__Spirosoma	1.6843			-
k__Bacteria.p__Bacteroidota.c__Kryptonia	2.34883			0.0201033
k__Bacteria.p__LCP_89	1.31289			-
k__Bacteria.p__Verrucomicrobiota.c__Lentisphaeria.o__Oligosphaerales	1.57897			-
k__Bacteria.p__Bacteroidota.c__Bacteroidia.o__Cytophagales.f__Hymenobacteraceae.g__Adhaeribacter	2.54753			0.00135064
k__Bacteria.p__Firmicutes.c__Clostridia.o__Clostridia_vadinBB60_group	3.79542			1.02397e-06
k__Bacteria.p__Actinobacteriota.c__Acidimicrobiia.o__Actinomarinales.f__uncultured	2.7486			5.0245e-05
k__Bacteria.p__Proteobacteria.c__Gammaproteobacteria.o__Burkholderiales.f__Comamonadaceae.g__Comamonadaceae	1.96572			-
k__Bacteria.p__Cyanobacteria.c__Vampirivibrionia.o__Vampirovibrionales.f__Vampirovibrionaceae.g__Vampirovibrionaceae	1.72568			-
k__Bacteria.p__Bacteroidota.c__Bacteroidia.o__Sphingobacteriales.f__AKYH767.g__AKYH767	1.31563			-
k__Bacteria.p__Planctomycetota.c__Phycisphaerae	2.29604			-
k__Bacteria.p__Actinobacteriota.c__Actinobacteria.o__Micrococcales.f__Intrasporangiaceae.g__Terrabacter	2.74346			8.16852e-06
k__Bacteria.p__Acidobacteriota.c__Subgroup_11.o__Subgroup_11.f__Subgroup_11.g__Subgroup_11	2.5811			0.000167467
k__Bacteria.p__Firmicutes.c__Bacilli.o__Paenibacillales.f__Paenibacillaceae.g__Paenibacillus	2.10106			-
k__Bacteria.p__Actinobacteriota.c__Actinobacteria.o__Micrococcales.f__Promicromonosporaceae.g__Myceligenerans	1.64014			-
k__Bacteria.p__Acidobacteriota.c__Subgroup_21.o__Subgroup_21	0.32774			-
k__Bacteria.p__Dependentiae.c__Babeliae.o__Babeliales.f__Babeliales	2.04211			-
k__Bacteria.p__Proteobacteria.c__Gammaproteobacteria.o__CCD24.f__CCD24.g__CCD24	2.67712			0.00119247
k__Bacteria.p__Actinobacteriota.c__Coriobacteriia.o__Coriobacteriales.f__Eggerthellaceae.g__DNF00809	0.92297			-
k__Bacteria.p__Myxococcota.c__Polyangia.o__Polyangiales.f__Sandaracinaceae.g__uncultured	2.2814			-
k__Bacteria.p__Proteobacteria.c__Gammaproteobacteria.o__Burkholderiales.f__Methylophilaceae.g__Methylotenera	2.01876			-
k__Bacteria.p__Proteobacteria.c__Gammaproteobacteria.o__Burkholderiales.f__Comamonadaceae.g__Ramlibacter	3.21998			1.30746e-06
k__Bacteria.p__Proteobacteria.c__Gammaproteobacteria.o__Enterobacterales.f__Erwiniaceae.g__Rosenbergiella	1.40692			-
k__Bacteria.p__Desulfobacterota.c__Desulfobulbia.o__Desulfobulbales	2.51001			9.46853e-05
k__Bacteria.p__Proteobacteria.c__Alphaproteobacteria.o__Rhizobiales.f__Beijerinckiaceae.Other	1.48898			-
k__Bacteria.p__Sva0485.c__Sva0485.o__Sva0485	1.64726			-
k__Bacteria.p__Proteobacteria.c__Alphaproteobacteria.o__Rhizobiales.f__Amb_16S_1323.g__Amb_16S_1323	2.37087			0.0163188
k__Bacteria.p__Firmicutes.c__Bacilli.o__Bacillales.f__Planococcaceae.g__Lysinibacillus	1.49897			-
k__Bacteria.p__Actinobacteriota.c__Acidimicrobiia.o__uncultured.f__uncultured.g__uncultured	2.87888			0.00162011
k__Bacteria.p__Deferribacterota.c__Deferribacteres.o__Deferribacterales	3.56775			5.68499e-06
k__Bacteria.p__Acidobacteriota.c__Acidobacteriae.o__Solibacterales.f__Solibacteraceae	2.92981			0.00044952
k__Bacteria.p__Proteobacteria.c__Alphaproteobacteria.o__Rhodobacterales.f__Rhodobacteraceae.g__Roseobacter_clade_CHAB_I_5_lineage	1.83609			-
k__Bacteria.p__Proteobacteria.c__Alphaproteobacteria.o__Parvibaculales.f__Parvibaculaceae.g__Parvibaculum	1.6843			-
k__Bacteria.p__Elusimicrobiota.c__Endomicrobia	1.73155			-
k__Bacteria.p__Proteobacteria.c__Alphaproteobacteria.o__Rhodobacterales.f__Rhodobacteraceae.g__Rubribacterium	1.99827			-
k__Bacteria.p__Proteobacteria.c__Gammaproteobacteria.o__SAR86_clade.f__SAR86_clade	1.82774			0.0144064
k__Bacteria.p__Actinobacteriota.c__Actinobacteria.o__Micrococcales.f__Microbacteriaceae.g__uncultured	1.95566			-
k__Bacteria.p__Proteobacteria.c__Alphaproteobacteria.o__Sphingomonadales.f__Sphingomonadaceae.Other	3.12702			2.80076e-06
k__Bacteria.p__Proteobacteria.c__Gammaproteobacteria.o__Burkholderiales.f__Nitrosomonadaceae.g__MND1	3.2278			2.78857e-06
k__Bacteria.p__Proteobacteria.c__Alphaproteobacteria.o__Caulobacterales.f__Caulobacteraceae	4.04491			2.1823e-07
k__Bacteria.p__Proteobacteria.c__Alphaproteobacteria.o__Rhizobiales.f__Xanthobacteraceae.g__Rhodopseudomonas	1.10533			-
k__Bacteria.p__Proteobacteria.c__Gammaproteobacteria.o__Burkholderiales.f__TRA3_20	3.19169			1.42059e-06
k__Bacteria.p__Actinobacteriota.c__Actinobacteria.o__Frankiales.f__Sporichthyaceae	2.38247			0.000719341
k__Bacteria.p__Verrucomicrobiota.c__Verrucomicrobiae.o__Verrucomicrobiales.f__Akkermansiaceae.g__Akkermansia	1.35428			-
k__Bacteria.p__Gemmatimonadota.c__Longimicrobia.o__Longimicrobiales.f__Longimicrobiaceae.g__Longimicrobium	2.66259			6.62501e-06
k__Bacteria.p__Firmicutes.c__Clostridia.o__Lachnospirales.f__Lachnospiraceae.g__Lachnospiraceae_NK3A20_group	1.73155			-
k__Bacteria.p__Acidobacteriota.c__Aminicenantia.o__Aminicenantales	1.91695			-
k__Bacteria.p__Bacteroidota.c__Bacteroidia.o__Bacteroidetes_VC2_1_Bac22.f__Bacteroidetes_VC2_1_Bac22.g__Bacteroidetes_VC2_1_Bac22	1.32791			-
k__Bacteria.p__Proteobacteria.c__Gammaproteobacteria.o__Xanthomonadales.Other.Other	1.61969			-
k__Bacteria.p__Firmicutes.c__Clostridia.o__Lachnospirales.f__Lachnospiraceae.g___Eubacterium__oxidoreducens_group	2.26527			0.000416102
k__Bacteria.p__Proteobacteria.c__Alphaproteobacteria.o__Rhodospirillales.f__uncultured	2.90587			6.7978e-05
k__Bacteria.p__Chloroflexi.c__TK10	1.40359			-
k__Bacteria.p__Proteobacteria.c__Gammaproteobacteria.o__Pasteurellales.f__Pasteurellaceae	3.91209			5.97891e-07
k__Bacteria.p__Proteobacteria.c__Gammaproteobacteria.o__Burkholderiales.f__Oxalobacteraceae.g__Oxalobacter	1.57781			-
k__Bacteria.p__Gemmatimonadota.c__Gemmatimonadetes.o__Gemmatimonadales.f__Gemmatimonadaceae.g__Gemmatimonas	3.27044			6.29697e-06
k__Bacteria.p__Proteobacteria.c__Alphaproteobacteria.o__Rhodobacterales.f__Rhodobacteraceae.g__HIMB11	2.62273			0.00306548
k__Bacteria.p__Firmicutes.c__Clostridia.o__Caldicoprobacterales	1.49921			-
k__Bacteria.p__Firmicutes.c__Bacilli.o__Erysipelotrichales.f__Erysipelatoclostridiaceae.g__Erysipelatoclostridiaceae	1.08856			-
k__Bacteria.p__Actinobacteriota.c__Coriobacteriia.o__Coriobacteriales	3.86059			6.29364e-05
k__Bacteria.p__Spirochaetota.c__Brevinematia.o__Brevinematales	2.82566			1.88257e-05
k__Bacteria.p__Proteobacteria.c__Alphaproteobacteria.o__Rhizobiales.f__Devosiaceae.g__uncultured	2.00205			-
k__Bacteria.p__Acidobacteriota.c__Acidobacteriae.o__Bryobacterales	3.09095			1.35634e-06
k__Bacteria.p__Proteobacteria.c__Gammaproteobacteria.o__Pseudomonadales.f__Moraxellaceae.g__uncultured	1.50707			-
k__Bacteria.p__Proteobacteria.c__Alphaproteobacteria.o__Rhizobiales.f__Beijerinckiaceae.g__uncultured	2.38764			8.57712e-05
k__Bacteria.p__Acidobacteriota.c__Acidobacteriae.o__Subgroup_13.f__Subgroup_13	1.56816			-
k__Bacteria.p__Firmicutes.c__Clostridia.o__Christensenellales.f__Christensenellaceae.Other	3.06442			2.77264e-06
k__Bacteria.p__Firmicutes.c__Bacilli.o__Alicyclobacillales	1.89157			-
k__Bacteria.p__Firmicutes.c__Clostridia.o__Peptostreptococcales_Tissierellales.f__Peptostreptococcaceae.g__Clostridioides	5.38682	L-NR	5.06724	4.01671e-07
k__Bacteria.p__Bdellovibrionota.c__Bdellovibrionia.o__Bdellovibrionales	2.71823			9.93294e-06
k__Bacteria.p__Desulfobacterota.c__Desulfobacteria.o__Desulfatiglandales	1.659			-
k__Bacteria.p__Spirochaetota.c__MVP_15.o__MVP_15	1.72568			-
k__Bacteria.p__Cyanobacteria.c__Cyanobacteriia.o__Cyanobacteriales	1.77982			-
k__Bacteria.p__Desulfobacterota.c__Desulfovibrionia.o__Desulfovibrionales.Other.Other	2.15397			1.51075e-06
k__Bacteria.p__Actinobacteriota.c__Actinobacteria.o__Pseudonocardiales.f__Pseudonocardiaceae.g__Actinophytocola	2.69569			0.0296502
k__Bacteria.p__Proteobacteria.c__Gammaproteobacteria.o__Burkholderiales.f__Sulfuricellaceae.g__Sulfurirhabdus	1.62544			-
k__Bacteria.p__Myxococcota	3.66701			3.14255e-06
k__Bacteria.p__Bdellovibrionota.c__Oligoflexia.o__Oligoflexales.f__Oligoflexales.g__Oligoflexus	1.1688			-
k__Bacteria.p__Desulfobacterota.c__Desulfobaccia.o__Desulfobaccales.f__Desulfobaccaceae	1.27316			-
k__Bacteria.p__Bacteroidota.c__Bacteroidia.o__Bacteroidetes_VC2_1_Bac22	1.32791			-
k__Bacteria.p__Proteobacteria.c__Gammaproteobacteria.o__Oceanospirillales.f__Nitrincolaceae.g__uncultured	1.84108			-
k__Bacteria.p__Proteobacteria.c__Gammaproteobacteria.o__Xanthomonadales	4.14603			1.18034e-07
k__Bacteria.p__Bacteroidota.c__SJA_28	1.6337			-
k__Bacteria.p__Firmicutes.c__Clostridia.o__Peptostreptococcales_Tissierellales.f__Peptostreptococcales_Tissierellales.g__Parvimonas	1.72098			-
k__Bacteria.p__Proteobacteria.c__Gammaproteobacteria.o__Burkholderiales.f__Comamonadaceae.g__Rhodoferax	1.95372			0.00638151
k__Bacteria.p__Chloroflexi.c__Dehalococcoidia.o__RBG_13_46_9.f__RBG_13_46_9.g__RBG_13_46_9	1.7166			-
k__Bacteria.p__Firmicutes.c__Negativicutes.o__Acidaminococcales.f__Acidaminococcaceae	2.09477			-
k__Bacteria.p__Myxococcota.c__Polyangia.o__VHS_B3_70	1.7413			-
k__Bacteria.p__Proteobacteria.c__Gammaproteobacteria.o__Xanthomonadales.f__Rhodanobacteraceae.g__Rhodanobacter	3.99179			1.68012e-07
k__Bacteria.p__Firmicutes.c__Clostridia.o__Oscillospirales.f___Clostridium__methylpentosum_group.g___Clostridium__methylpentosum_group	2.34005			0.000853797
k__Bacteria.p__Proteobacteria.c__Gammaproteobacteria.o__Cellvibrionales.f__Cellvibrionaceae	2.88083			6.8312e-06
k__Bacteria.p__Bacteroidota.c__Bacteroidia.o__Sphingobacteriales.f__env_OPS_17	2.36583			-
k__Bacteria.p__Firmicutes.c__Clostridia.o__Oscillospirales.f__Oscillospiraceae.g__Oscillospira	1.42782			0.0027573
k__Bacteria.p__Bacteroidota.c__Kryptonia.o__Kryptoniales.f__BSV26	2.21726			0.0201033
k__Bacteria.p__Actinobacteriota.c__Actinobacteria.o__Frankiales	3.33352			1.80697e-06
k__Bacteria.p__Cyanobacteria	2.59945			0.000344717
k__Bacteria.p__Acidobacteriota.c__Subgroup_11.o__Subgroup_11	2.5811			0.000167467
k__Bacteria.p__Deferribacterota.c__Deferribacteres	3.56775			5.68499e-06
k__Bacteria.p__Myxococcota.c__Polyangia.o__mle1_27.f__mle1_27	2.01432			-
k__Bacteria.p__Proteobacteria.c__Gammaproteobacteria.o__Burkholderiales.f__Sulfuricellaceae	1.62544			-
k__Bacteria.p__Actinobacteriota.c__Thermoleophilia.o__Gaiellales.f__uncultured.g__uncultured	3.50927			1.90207e-06
k__Bacteria.p__Actinobacteriota.c__Actinobacteria.o__0319_7L14	3.59282			6.51932e-07
k__Bacteria.p__Patescibacteria.c__Saccharimonadia.o__Saccharimonadales.f__Saccharimonadaceae.g__Candidatus_Saccharimonas	1.33127			-
k__Bacteria.p__Acidobacteriota.c__Acidobacteriae.o__Acidobacteriales.f__Koribacteraceae.g__Candidatus_Koribacter	2.68137			0.0178408
k__Bacteria.p__Fusobacteriota.c__Fusobacteriia.o__Fusobacteriales	3.80599			3.24797e-07
k__Bacteria.p__Actinobacteriota.c__Acidimicrobiia.Other	3.43686			1.70743e-06
k__Bacteria.p__Firmicutes.c__Clostridia.o__Peptostreptococcales_Tissierellales.f__Peptostreptococcaceae.g__Terrisporobacter	4.25331			4.69865e-06
k__Bacteria.p__Acidobacteriota.c__Subgroup_21.o__Subgroup_21.f__Subgroup_21.g__Subgroup_21	0.32774			-
k__Bacteria.p__Firmicutes.c__Clostridia.o__Lachnospirales.f__Lachnospiraceae.g__Epulopiscium	2.18173			8.34876e-05
k__Bacteria.p__Cyanobacteria.c__Cyanobacteriia.Other.Other	2.18276			0.000543406
k__Bacteria.p__Proteobacteria.c__Alphaproteobacteria.o__Rhodobacterales.f__Rhodobacteraceae.g__Rubellimicrobium	2.96132			0.000170783
k__Bacteria.p__Proteobacteria.c__Gammaproteobacteria.o__Pseudomonadales.f__Moraxellaceae.g__Psychrobacter	1.46924			-
k__Bacteria.p__Bacteroidota.c__Bacteroidia.o__Bacteroidales.f__Prolixibacteraceae	2.59934			0.0014153
k__Bacteria.p__Bacteroidota.c__Bacteroidia.o__Bacteroidales.f__Barnesiellaceae.g__Barnesiella	2.92474			0.000346982
k__Bacteria.p__Patescibacteria.c__Gracilibacteria.o__Absconditabacteriales__SR1_	2.43088			0.000931335
k__Bacteria.p__Firmicutes.c__Clostridia.o__Lachnospirales.f__Lachnospiraceae.g___Ruminococcus__gauvreauii_group	2.26345			0.045299
k__Bacteria.p__Myxococcota.c__Polyangia.o__Haliangiales.f__Haliangiaceae	2.94458			0.000340781
k__Bacteria.p__Proteobacteria.c__Alphaproteobacteria.o__Rhizobiales.f__Devosiaceae.g__Pelagibacterium	1.00365			-
k__Bacteria.p__Actinobacteriota.c__Thermoleophilia.o__Solirubrobacterales	3.43418			1.94805e-06
k__Bacteria.Other.Other	3.86091			5.96084e-08
k__Bacteria.p__Nitrospirota.c__Leptospirillia.o__Leptospirillales	1.90175			-
k__Bacteria.p__Deinococcota.c__Deinococci.o__Deinococcales.f__Deinococcaceae.g__uncultured	1.64995			-
k__Bacteria.p__Verrucomicrobiota.c__Chlamydiae.o__Chlamydiales.f__Chlamydiaceae	1.56395			-
k__Bacteria.p__Bacteroidota.c__Bacteroidia.o__Flavobacteriales.f__Crocinitomicaceae.g__Fluviicola	0.59333			-
k__Bacteria.p__Planctomycetota.c__Phycisphaerae.o__Phycisphaerales.f__Phycisphaeraceae.g__SM1A02	2.29604			-
k__Bacteria.p__Elusimicrobiota.c__Lineage_IIc.o__Lineage_IIc.f__Lineage_IIc	1.69439			-
k__Bacteria.p__RCP2_54.c__RCP2_54.o__RCP2_54	2.64464			0.000300961
k__Bacteria.p__Spirochaetota.c__Spirochaetia	3.17484			1.73983e-07
k__Bacteria.p__Firmicutes.c__Bacilli.o__Erysipelotrichales.f__Erysipelotrichaceae.g__Solobacterium	1.54176			-
k__Bacteria.p__NB1_j	2.21128			-
k__Bacteria.p__Proteobacteria.c__Gammaproteobacteria.o__Enterobacterales.f__Yersiniaceae	3.14459			1.88981e-05
k__Bacteria.p__Actinobacteriota.c__Acidimicrobiia.o__Actinomarinales.Other	0.31601			-
k__Bacteria.p__Bacteroidota.c__Bacteroidia.o__Flavobacteriales.f__Flavobacteriaceae.g__Gelidibacter	1.43706			-
k__Bacteria.p__Proteobacteria.c__Alphaproteobacteria.o__Rhizobiales.f__Hyphomicrobiaceae.Other	1.36913			-
k__Bacteria.p__Actinobacteriota.c__Acidimicrobiia.o__Acidimicrobiales.f__Acidimicrobiaceae	1.62896			-
k__Bacteria.p__Dependentiae.c__Babeliae.o__Babeliales.Other.Other	2.56413			0.00780363
k__Bacteria.p__Proteobacteria.c__Gammaproteobacteria.o__Gammaproteobacteria_Incertae_Sedis	3.11508			1.08565e-06
k__Bacteria.p__Actinobacteriota.c__Actinobacteria.o__Micrococcales.f__Micrococcaceae.g__Nesterenkonia	2.03258			-
k__Bacteria.p__Bacteroidota.c__Bacteroidia.o__Cytophagales.f__Microscillaceae.g__Ohtaekwangia	2.55077			0.00092044
k__Bacteria.p__Desulfobacterota.c__Desulfobulbia.o__Desulfobulbales.f__Desulfocapsaceae.g__uncultured	1.78049			-
k__Bacteria.p__Proteobacteria.c__Alphaproteobacteria.o__Paracaedibacterales.f__Paracaedibacteraceae.g__Candidatus_Captivus	1.54176			-
k__Bacteria.p__Firmicutes.c__Clostridia.o__Oscillospirales.f___Eubacterium__coprostanoligenes_group	4.06025			1.23489e-05
k__Bacteria.p__Proteobacteria.c__Gammaproteobacteria.o__Cellvibrionales.f__Cellvibrionaceae.Other	1.06035			-
k__Bacteria.p__Cyanobacteria.c__Vampirivibrionia.o__Gastranaerophilales.f__Gastranaerophilales.g__Gastranaerophilales	1.37237			-
k__Bacteria.p__Firmicutes.c__Clostridia.o__Lachnospirales.f__Lachnospiraceae.g__Lachnospiraceae_UCG_006	2.86987			6.32632e-06
k__Bacteria.p__Firmicutes.c__Clostridia.o__Lachnospirales.f__Lachnospiraceae.g__Lachnospiraceae_UCG_004	3.12852			3.20706e-05
k__Bacteria.p__Firmicutes.c__Clostridia.o__Lachnospirales.f__Lachnospiraceae.g__Lachnospiraceae_UCG_003	0.768496			-
k__Bacteria.p__Firmicutes.c__Clostridia.o__Lachnospirales.f__Lachnospiraceae.g__Lachnospiraceae_UCG_001	3.03689			1.97887e-05
k__Bacteria.p__Firmicutes.c__Clostridia.o__Lachnospirales.f__Lachnospiraceae.g__Lachnospiraceae_UCG_009	1.80427			-
k__Bacteria.p__Proteobacteria.c__Gammaproteobacteria.o__Enterobacterales	4.99499	S-Anti	4.68492	1.05897e-07
k__Bacteria.p__Actinobacteriota.c__Actinobacteria.o__Glycomycetales	2.21866			-
k__Bacteria.p__Firmicutes.c__Bacilli	5.20297	S-NOB	4.8497	0.000615169
k__Bacteria.p__Entotheonellaeota.c__Entotheonellia.o__Entotheonellales	2.07965			-
k__Bacteria.p__Proteobacteria.c__Gammaproteobacteria.o__Pseudomonadales.f__Moraxellaceae.g__Paraperlucidibaca	1.40278			-
k__Bacteria.p__Gemmatimonadota.c__AKAU4049.o__AKAU4049.f__AKAU4049.g__AKAU4049	1.99375			-
k__Bacteria.p__Proteobacteria.c__Alphaproteobacteria.o__Rhizobiales.f__Rhodobiaceae	1.73867			-
k__Bacteria.p__Bacteroidota.c__Bacteroidia.Other	2.395			0.0192698
k__Bacteria.p__Acidobacteriota.c__Holophagae.o__Holophagales.f__Holophagaceae	2.70376			0.00248562
k__Bacteria.p__Bacteroidota.c__Bacteroidia.o__Bacteroidales.f__Rikenellaceae.g__Rikenellaceae_RC9_gut_group	4.86351	S-C	4.55993	7.67271e-08
k__Bacteria.p__Proteobacteria.c__Gammaproteobacteria.o__CCD24	2.67712			0.00119247
k__Bacteria.p__Bacteroidota.c__Bacteroidia.o__Chitinophagales.f__37_13	2.21681			0.0152152
k__Bacteria.p__Bacteroidota.c__Bacteroidia.o__Chitinophagales.f__Chitinophagaceae.g__Ferruginibacter	2.02738			0.0334354
k__Bacteria.p__Acidobacteriota.c__Thermoanaerobaculia	2.83926			4.07173e-06
k__Bacteria.p__Desulfobacterota.c__uncultured	2.3375			0.018647
k__Bacteria.p__Firmicutes.c__Clostridia.o__Lachnospirales.f__Lachnospiraceae.g__Tuzzerella	3.7928			2.26065e-06
k__Bacteria.p__Firmicutes.c__Clostridia.o__Oscillospirales.f__Oscillospirales	1.6207			8.67939e-06
k__Bacteria.p__Desulfobacterota.c__Desulfuromonadia.o__Desulfuromonadia.f__Desulfuromonadaceae.g__Desulfuromonadaceae	1.87772			0.0408519
k__Bacteria.p__Firmicutes.c__Clostridia.o__Oscillospirales.f__Butyricicoccaceae	3.3144			5.04012e-07
k__Bacteria.p__Acidobacteriota.c__Acidobacteriae.o__Acidobacteriales.Other	2.16251			0.00520139
k__Bacteria.p__Bacteroidota.c__Bacteroidia.o__Chitinophagales.f__Chitinophagaceae.g__Parafilimonas	1.49866			-
k__Bacteria.p__Fibrobacterota.c__Fibrobacteria	2.5847			0.0344907
k__Bacteria.p__Actinobacteriota.c__Actinobacteria.o__Micrococcales.f__Micrococcaceae.g__Rothia	3.07326			7.10936e-06
k__Bacteria.p__Proteobacteria.c__Alphaproteobacteria.o__SAR11_clade.f__Clade_II.g__Clade_II	2.43096			0.00109886
k__Bacteria.p__Actinobacteriota.c__Actinobacteria.o__Streptomycetales	3.41807			1.67149e-06
k__Bacteria.p__Actinobacteriota.c__Acidimicrobiia.o__Microtrichales.f__Iamiaceae	2.75341			0.000234259
k__Bacteria.p__Bacteroidota.c__Bacteroidia.o__Flavobacteriales.f__Flavobacteriaceae.g__Gillisia	1.41023			-
k__Bacteria.p__Firmicutes.c__Negativicutes.o__Veillonellales_Selenomonadales.f__Veillonellaceae.g__Veillonella	1.60496			-
k__Bacteria.p__Zixibacteria	2.03938			-
k__Bacteria.p__Cyanobacteria.c__Cyanobacteriia.o__Leptolyngbyales	1.95239			-
k__Bacteria.p__Firmicutes.c__Clostridia.o__Lachnospirales.f__Lachnospiraceae.g___Bacteroides__pectinophilus_group	1.26709			-
k__Bacteria.p__Actinobacteriota.c__MB_A2_108.o__MB_A2_108.f__MB_A2_108	3.28427			3.52345e-06
k__Bacteria.p__Bacteroidota.c__Kapabacteria.o__Kapabacteriales	2.43168			0.0177373
k__Bacteria.p__Proteobacteria.c__Gammaproteobacteria.o__Burkholderiales.f__Chromobacteriaceae	0.774404			-
k__Bacteria.p__Dependentiae.c__Babeliae.o__Babeliales.f__Vermiphilaceae.g__Vermiphilaceae	1.92576			-
k__Bacteria.p__Proteobacteria.c__Gammaproteobacteria	5.26623	S-Anti	4.9594	9.37722e-08
k__Bacteria.p__Firmicutes.c__Bacilli.o__Lactobacillales.f__Carnobacteriaceae	2.93794			0.00013607
k__Bacteria.p__Proteobacteria.c__Gammaproteobacteria.o__Gammaproteobacteria_Incertae_Sedis.f__Unknown_Family.g__uncultured	2.48307			5.6844e-05
k__Bacteria.p__Acidobacteriota.c__Acidobacteriae.o__Acidobacteriales.f__Acidobacteriaceae__Subgroup_1_.g__Occallatibacter	2.31252			0.0215399
k__Bacteria.p__Elusimicrobiota.c__Elusimicrobia.o__MVP_88.f__MVP_88	1.94221			-
k__Bacteria.p__Desulfobacterota.c__Desulfovibrionia.o__Desulfovibrionales.f__Desulfovibrionaceae.g__Desulfovibrio	2.58266			0.000700192
k__Bacteria.p__Bacteroidota.c__Bacteroidia.o__Cytophagales.f__Microscillaceae.Other	2.47712			0.00426801
k__Bacteria.p__Firmicutes.c__Clostridia.o__Peptostreptococcales_Tissierellales.f__Peptostreptococcaceae.g__Paeniclostridium	1.96516			-
k__Bacteria.p__Acidobacteriota.c__Acidobacteriae.o__Bryobacterales.f__Bryobacteraceae.g__Bryobacter	3.09095			1.35634e-06
k__Bacteria.p__Proteobacteria.c__Gammaproteobacteria.o__Cellvibrionales.f__Spongiibacteraceae.g__BD1_7_clade	0.597574			-
k__Bacteria.p__Proteobacteria.c__Gammaproteobacteria.o__JTB23	0.311274			-
k__Bacteria.p__Proteobacteria.c__Gammaproteobacteria.o__Xanthomonadales.f__Xanthomonadaceae.g__Arenimonas	2.43145			-
k__Bacteria.p__Patescibacteria.c__Parcubacteria.o__Candidatus_Jorgensenbacteria.f__Candidatus_Jorgensenbacteria	1.74159			-
k__Bacteria.p__Acidobacteriota.c__Acidobacteriae.o__Acidobacteriales.f__Acidobacteriaceae__Subgroup_1_.g__Acidipila	0.307527			-
k__Bacteria.p__Proteobacteria.c__Alphaproteobacteria.o__Rhodobacterales	3.80085			1.04524e-06
k__Bacteria.p__Proteobacteria.c__Gammaproteobacteria.o__Burkholderiales.f__Rhodocyclaceae.g__Propionivibrio	1.3981			-
k__Bacteria.p__Acidobacteriota.c__Vicinamibacteria	1.91245			-
k__Bacteria.p__Proteobacteria.c__Alphaproteobacteria.o__Caulobacterales	4.08004			1.70921e-07
k__Bacteria.p__Actinobacteriota.c__Actinobacteria.o__Micrococcales.f__Micrococcaceae	3.61913			4.20332e-07
k__Bacteria.p__Desulfobacterota.Other.Other.Other	1.48764			-
k__Bacteria.p__Fibrobacterota	2.5847			0.0344907
k__Bacteria.p__Firmicutes.c__Clostridia.o__Eubacteriales.f__Anaerofustaceae.g__Anaerofustis	1.9946			1.40992e-07
k__Bacteria.p__Proteobacteria.c__Gammaproteobacteria.o__Cardiobacteriales.f__Cardiobacteriaceae	1.81285			-
k__Bacteria.p__Proteobacteria.c__Gammaproteobacteria.o__Burkholderiales.f__Rhodocyclaceae.g__Rhodocyclaceae	0.795779			-
k__Bacteria.p__Proteobacteria.c__Alphaproteobacteria.o__Kiloniellales.f__Kiloniellaceae.Other	1.17284			-
k__Bacteria.p__Cyanobacteria.c__Cyanobacteriia.Other	2.18276			0.000543406
k__Bacteria.p__Proteobacteria.c__Gammaproteobacteria.o__KI89A_clade.f__KI89A_clade	2.06349			-
k__Bacteria.p__Actinobacteriota.c__Actinobacteria.o__Corynebacteriales.f__Nocardiaceae.g__Williamsia	1.07216			0.0329924
k__Bacteria.p__Acidobacteriota.c__Thermoanaerobaculia.o__Thermoanaerobaculales	2.83926			4.07173e-06
k__Bacteria.p__Bacteroidota.c__Bacteroidia.o__Chitinophagales.f__Chitinophagaceae.g__Edaphobaculum	2.14818			-
k__Bacteria.p__Gemmatimonadota.c__AKAU4049.o__AKAU4049	1.99375			-
k__Bacteria.p__Acidobacteriota.c__Subgroup_26.o__Subgroup_26.f__Subgroup_26.g__Subgroup_26	2.08026			-
k__Bacteria.p__Proteobacteria.c__Gammaproteobacteria.o__Aeromonadales.f__Aeromonadaceae.g__Aeromonas	1.70731			-
k__Bacteria.p__Actinobacteriota.c__Actinobacteria.o__Pseudonocardiales.f__Pseudonocardiaceae.g__Saccharopolyspora	1.21598			-
k__Bacteria.p__Actinobacteriota.Other	2.7004			3.39941e-07
k__Bacteria.p__Cyanobacteria.c__Vampirivibrionia.o__Vampirovibrionales.f__Vampirovibrionaceae	1.85405			-
k__Bacteria.p__Actinobacteriota.c__Actinobacteria.o__Micrococcales.f__Microbacteriaceae.g__Leucobacter	0.32774			-
k__Bacteria.p__MBNT15.c__MBNT15.o__MBNT15	2.32039			0.0466515
k__Bacteria.p__Proteobacteria.c__Alphaproteobacteria.o__Caulobacterales.f__Hyphomonadaceae.g__SWB02	2.91629			5.95241e-07
k__Bacteria.p__Proteobacteria.c__Gammaproteobacteria.o__Burkholderiales.f__Gallionellaceae.g__Sideroxydans	1.36913			-
k__Bacteria.p__Proteobacteria.c__Gammaproteobacteria.o__Cellvibrionales.f__Halieaceae.g__Parahaliea	1.93144			-
k__Bacteria.p__Campilobacterota	3.54283			3.67451e-06
k__Bacteria.p__Chloroflexi.c__TK10.o__TK10	1.40359			-
k__Bacteria.p__Firmicutes.c__Clostridia.o__Christensenellales.f__Christensenellaceae.g__Christensenellaceae_R_7_group	3.06767			5.62326e-05
k__Bacteria.p__Actinobacteriota.c__Rubrobacteria.o__Rubrobacterales.f__Rubrobacteriaceae	3.06972			2.52608e-05
k__Bacteria.p__Actinobacteriota.c__Actinobacteria.o__Micrococcales.f__Intrasporangiaceae.g__Ornithinimicrobium	1.57968			-
k__Bacteria.p__Actinobacteriota.c__Acidimicrobiia.o__Microtrichales.f__Ilumatobacteraceae.g__Ilumatobacter	2.3166			-
k__Bacteria.p__Firmicutes.c__Clostridia.o__Lachnospirales.f__Lachnospiraceae.g__Lachnoanaerobaculum	2.0647			0.00228456
k__Bacteria.p__Proteobacteria.c__Alphaproteobacteria.o__Defluviicoccales.f__Defluviicoccaceae.g__Defluviicoccus	1.63201			-
k__Bacteria.p__Proteobacteria.c__Gammaproteobacteria.o__KF_JG30_C25	2.02321			0.0498833
k__Bacteria.p__Proteobacteria.c__Alphaproteobacteria.o__Rhodospirillales.f__Magnetospiraceae.g__uncultured	1.77814			-
k__Bacteria.p__Bacteroidota.c__Bacteroidia.o__Bacteroidales.f__Muribaculaceae.g__Muribaculum	3.76092			2.41447e-07
k__Bacteria.p__Proteobacteria.c__Gammaproteobacteria.o__Aeromonadales.f__Aeromonadaceae	2.0291			-
k__Bacteria.p__Actinobacteriota.c__Actinobacteria.o__Pseudonocardiales.f__Pseudonocardiaceae	3.23361			3.86736e-06
k__Bacteria.p__Firmicutes.c__Clostridia.o__Oscillospirales.f__Oscillospiraceae.g__NK4A214_group	3.65045			1.03973e-06
k__Bacteria.p__Actinobacteriota.c__Actinobacteria.o__Micrococcales.f__Micrococcaceae.Other	3.46514			8.85517e-07
k__Bacteria.p__Actinobacteriota.c__Thermoleophilia.o__Gaiellales.Other.Other	2.59528			0.00185934
k__Bacteria.p__Firmicutes.c__Bacilli.o__Erysipelotrichales.Other	1.02735			0.0329924
k__Bacteria.p__Proteobacteria.c__Gammaproteobacteria.o__Steroidobacterales.f__Steroidobacteraceae.g__uncultured	2.51319			0.0444162
k__Bacteria.p__Bacteroidota.c__Bacteroidia.o__Flavobacteriales.f__Flavobacteriaceae.g__Winogradskyella	1.26447			-
k__Bacteria.p__Proteobacteria.c__Gammaproteobacteria.o__Burkholderiales.f__Alcaligenaceae.g__Paenalcaligenes	0.936667			-
k__Bacteria.p__Proteobacteria.c__Gammaproteobacteria.o__Vibrionales.f__Vibrionaceae	3.64795			2.05173e-06
k__Bacteria.p__FCPU426.c__FCPU426	1.80344			-
k__Bacteria.p__Firmicutes.c__Negativicutes.o__Veillonellales_Selenomonadales.f__Veillonellaceae.g__Megasphaera	1.31658			-
k__Bacteria.p__Firmicutes.c__Bacilli.o__Lactobacillales.f__Lactobacillaceae	4.6855	L-C	4.33641	6.55394e-07
k__Bacteria.p__Myxococcota.c__Myxococcia.o__Myxococcales.f__Myxococcaceae.g__P3OB_42	2.4363			0.00191107
k__Bacteria.p__Firmicutes.c__Bacilli.o__Staphylococcales.f__Gemellaceae.g__Gemella	2.40853			0.00121416
k__Bacteria.p__Desulfobacterota.c__uncultured.o__uncultured	2.3375			0.018647
k__Bacteria.p__Firmicutes.c__Clostridia.o__Peptococcales.f__Peptococcaceae.g__Peptococcus	2.95128			9.69598e-08
k__Bacteria.p__Actinobacteriota.c__Actinobacteria.o__Pseudonocardiales.f__Pseudonocardiaceae.g__Lechevalieria	2.45183			0.0242831
k__Bacteria.p__Proteobacteria.c__Alphaproteobacteria.o__Rhizobiales.f__Xanthobacteraceae	3.64828			5.58414e-07
k__Bacteria.p__Actinobacteriota.c__Actinobacteria.o__Kineosporiales.f__Kineosporiaceae.g__Angustibacter	2.04788			-
k__Bacteria.p__Bacteroidota.c__Bacteroidia.o__Flavobacteriales.f__NS7_marine_group	1.60414			-
k__Bacteria.p__Latescibacterota.c__Latescibacterota.o__Latescibacterota	1.94275			-
k__Bacteria.p__Proteobacteria.c__Alphaproteobacteria.o__Sphingomonadales.f__Sphingomonadaceae.g__Polymorphobacter	1.97562			-
k__Bacteria.p__Chloroflexi.c__Dehalococcoidia.o__SAR202_clade	1.88731			-
k__Bacteria.p__Proteobacteria.c__Gammaproteobacteria.o__SAR86_clade.f__SAR86_clade.g__SAR86_clade	1.82774			0.0144064
k__Bacteria.p__Proteobacteria.c__Alphaproteobacteria.o__Defluviicoccales.f__Defluviicoccaceae	1.63201			-
k__Bacteria.p__Bacteroidota.c__Rhodothermia.o__Rhodothermales.f__Rhodothermaceae	1.91727			-
k__Bacteria.p__Proteobacteria.c__Gammaproteobacteria.o__Xanthomonadales.f__Xanthomonadaceae.Other	2.74955			3.08672e-06
k__Bacteria.p__Firmicutes.c__Clostridia.o__Clostridia	2.33974			-
k__Bacteria.p__Proteobacteria.c__Gammaproteobacteria.o__Steroidobacterales.f__Steroidobacteraceae	2.90183			8.38664e-06
k__Bacteria.p__Proteobacteria.c__Alphaproteobacteria.o__Rhodospirillales.f__Magnetospirillaceae	2.1333			-
k__Bacteria.p__Chloroflexi.c__Ktedonobacteria.o__Ktedonobacterales.f__JG30_KF_AS9.g__JG30_KF_AS9	2.92582			5.1719e-05
k__Bacteria.p__Desulfobacterota.c__Desulfovibrionia.o__Desulfovibrionales.f__Desulfovibrionaceae	4.52208	S-C	4.22342	5.1837e-08
k__Bacteria.p__Proteobacteria.c__Gammaproteobacteria.o__Enterobacterales.f__Erwiniaceae	2.5387			-
k__Bacteria.p__Firmicutes.c__Clostridia.Other	3.66726			4.76249e-06
k__Bacteria.p__Proteobacteria.c__Alphaproteobacteria.o__Sphingomonadales.f__Sphingomonadaceae.g__Sandaracinobacter	2.50289			2.55663e-05
k__Bacteria.p__Marinimicrobia__SAR406_clade_.c__Marinimicrobia__SAR406_clade_	1.47533			-
k__Bacteria.p__Firmicutes.c__Bacilli.o__Mycoplasmatales	3.20115			4.30801e-06
k__Bacteria.p__Cyanobacteria.c__Cyanobacteriia.o__Cyanobacteriales.Other	1.77982			-
k__Bacteria.p__Firmicutes.c__Clostridia.o__Lachnospirales.f__Lachnospiraceae.g__Lachnospiraceae_NC2004_group	1.62896			-
k__Bacteria.p__Acidobacteriota.c__Subgroup_5.o__Subgroup_5.f__Subgroup_5.g__Subgroup_5	2.56735			0.0446818
k__Bacteria.p__Proteobacteria.c__Alphaproteobacteria.o__Rhizobiales.f__Devosiaceae.Other	1.60649			-
k__Bacteria.p__Firmicutes.c__Clostridia.o__Oscillospirales.f__Ruminococcaceae.g__Fournierella	1.50459			-
k__Bacteria.p__Bacteroidota.c__Bacteroidia.o__Bacteroidales.f__Rikenellaceae.Other	2.64389			0.00136968
k__Bacteria.p__Proteobacteria.c__Gammaproteobacteria.o__Burkholderiales.f__Rhodocyclaceae.g__Methyloversatilis	2.00472			-
k__Bacteria.p__Armatimonadota.c__Fimbriimonadia.o__Fimbriimonadales	1.76931			-
k__Bacteria.p__Bacteroidota.c__Bacteroidia.o__Bacteroidales.f__Prevotellaceae	4.90149	S-Anti	4.57312	3.6983e-07
k__Bacteria.p__Actinobacteriota.c__Acidimicrobiia.o__Microtrichales	3.27173			3.52589e-07
k__Bacteria.p__Patescibacteria.c__Gracilibacteria.o__Absconditabacteriales__SR1_.f__Absconditabacteriales__SR1_.g__Absconditabacteriales__SR1_	2.43088			0.000931335
k__Bacteria.p__Actinobacteriota.c__Acidimicrobiia.o__Microtrichales.f__Ilumatobacteraceae	2.84401			1.30398e-06
k__Bacteria.p__Firmicutes.c__Clostridia.o__Oscillospirales.f__Oscillospiraceae.g__Oscillospiraceae	1.54911			-
k__Bacteria.p__Proteobacteria.c__Alphaproteobacteria.o__Defluviicoccales.f__uncultured.g__uncultured	1.93192			-
k__Bacteria.p__Firmicutes.c__Bacilli.o__Acholeplasmatales	2.37922			0.00464068
k__Bacteria.p__Firmicutes.c__Clostridia.o__Lachnospirales.f__Lachnospiraceae.g__Natranaerovirga	1.79506			-
k__Bacteria.p__Actinobacteriota.c__Actinobacteria.o__Propionibacteriales.f__Nocardioidaceae	3.30611			4.96983e-07
k__Bacteria.p__Proteobacteria.c__Gammaproteobacteria.o__Burkholderiales.f__A21b.g__A21b	0.623666			-
k__Bacteria.p__Bacteroidota.c__Bacteroidia.o__Chitinophagales.f__Chitinophagaceae.g__Terrimonas	2.57179			0.00102465
k__Bacteria.p__Proteobacteria.c__Alphaproteobacteria.o__Rhizobiales.f__Rhizobiaceae.Other	2.30781			0.00571007
k__Bacteria.p__SAR324_clade_Marine_group_B_.c__SAR324_clade_Marine_group_B_.o__SAR324_clade_Marine_group_B_.f__SAR324_clade_Marine_group_B_	2.15525			-
k__Bacteria.p__Proteobacteria.c__Gammaproteobacteria.o__Salinisphaerales.f__Solimonadaceae	2.84605			9.12321e-05
k__Bacteria.p__Proteobacteria.c__Alphaproteobacteria.o__Elsterales.f__Elsteraceae	1.08568			-
k__Bacteria.p__Firmicutes.c__Bacilli.o__Erysipelotrichales.f__Erysipelatoclostridiaceae.g__Candidatus_Stoquefichus	2.02414			0.000396374
k__Bacteria.p__Proteobacteria.c__Gammaproteobacteria.o__Burkholderiales.f__Nitrosomonadaceae.g__oc32	1.67472			-
k__Bacteria.p__Gemmatimonadota.c__Gemmatimonadetes.o__Gemmatimonadales.f__Gemmatimonadaceae.g__uncultured	3.72408			3.57809e-07
k__Bacteria.p__Bdellovibrionota.c__Oligoflexia.o__0319_6G20.f__0319_6G20.g__0319_6G20	2.65309			2.28047e-05
k__Bacteria.p__Actinobacteriota.c__Actinobacteria.o__Propionibacteriales.f__Nocardioidaceae.Other	1.85081			-
k__Bacteria.p__Bacteroidota.c__Bacteroidia.o__Flavobacteriales.f__Flavobacteriaceae.g__Aequorivita	1.95658			-
k__Bacteria.p__Acidobacteriota.c__Subgroup_5	2.56735			0.0446818
k__Bacteria.p__Sva0485.c__Sva0485.o__Sva0485.f__Sva0485.g__Sva0485	1.64726			-
k__Bacteria.p__Actinobacteriota.c__Actinobacteria.o__Frankiales.f__Sporichthyaceae.g__uncultured	1.56283			-
k__Bacteria.p__Desulfobacterota.c__Desulfobulbia.o__Desulfobulbales.f__Desulfocapsaceae.g__Desulfopila	1.61761			-
k__Bacteria.p__Proteobacteria.c__Gammaproteobacteria.o__Burkholderiales.f__Nitrosomonadaceae.g__Ellin6067	2.99085			7.6503e-06
k__Bacteria.p__Proteobacteria.c__Gammaproteobacteria.o__Burkholderiales.f__Methylophilaceae.g__uncultured	1.76247			-
k__Bacteria.p__Firmicutes.c__Bacilli.o__Mycoplasmatales.f__Mycoplasmataceae	3.20115			4.30801e-06
k__Bacteria.p__Firmicutes.c__Clostridia.o__Christensenellales.f__Christensenellaceae.g__uncultured	3.0909			1.13286e-06
k__Bacteria.p__Bacteroidota.c__Bacteroidia.o__Bacteroidales.f__Prevotellaceae.g__Prevotellaceae_NK3B31_group	3.60853			2.17457e-07
k__Bacteria.p__Bacteroidota.c__Bacteroidia.o__Cytophagales.f__Hymenobacteraceae.g__Hymenobacter	3.17814			3.27869e-06
k__Bacteria.p__Actinobacteriota.c__Actinobacteria.o__Bifidobacteriales	3.8063			6.72982e-07
k__Bacteria.p__Bdellovibrionota.c__Oligoflexia.o__0319_6G20	2.65309			2.28047e-05
k__Bacteria.p__Proteobacteria.c__Alphaproteobacteria.o__Rhizobiales.f__uncultured.g__uncultured	2.74021			0.00711491
k__Bacteria.p__Proteobacteria.c__Alphaproteobacteria.o__Rhizobiales.f__Beijerinckiaceae.g__Microvirga	1.76585			-
k__Bacteria.p__Firmicutes.c__Bacilli.o__Lactobacillales.f__Catellicoccaceae	2.79225			4.16802e-05
k__Bacteria.p__Acidobacteriota.c__Vicinamibacteria.o__Vicinamibacterales	1.91245			-
k__Bacteria.p__Proteobacteria.c__Gammaproteobacteria.o__MBMPE27.f__MBMPE27.g__MBMPE27	1.36509			-
k__Bacteria.p__Acidobacteriota.c__Acidobacteriae.o__AKIW659	1.61666			-
k__Bacteria.p__Firmicutes.c__Clostridia.o__Oscillospirales.f__Ruminococcaceae.g__Anaerotruncus	3.51751			6.37956e-07
k__Bacteria.p__Firmicutes.c__Clostridia.o__Peptostreptococcales_Tissierellales.f__Anaerovoracaceae.g___Eubacterium__brachy_group	2.39828			7.09448e-05
k__Bacteria.p__Proteobacteria.c__Gammaproteobacteria.o__Burkholderiales.f__B1_7BS	1.6388			-
k__Bacteria.p__Bacteroidota.c__Bacteroidia.o__Flavobacteriales.f__Flavobacteriaceae.g__Aurantivirga	1.22539			-
k__Bacteria.p__Chloroflexi.c__Anaerolineae.o__Ardenticatenales.f__Ardenticatenaceae.g__uncultured	1.79275			-
k__Bacteria.p__Proteobacteria.c__Alphaproteobacteria.o__Sphingomonadales.f__Sphingomonadaceae.g__Qipengyuania	2.47104			0.0240952
k__Bacteria.p__Desulfobacterota.c__Desulfovibrionia.o__Desulfovibrionales	4.52393	S-C	4.22522	5.1837e-08
k__Bacteria.p__Bacteroidota.c__Kapabacteria.o__Kapabacteriales.f__Kapabacteriales	2.43168			0.0177373
k__Bacteria.p__Proteobacteria.c__Gammaproteobacteria.o__Salinisphaerales.f__Solimonadaceae.g__Panacagrimonas	2.45519			0.00187454
k__Bacteria.p__Proteobacteria.c__Gammaproteobacteria.o__SS1_B_09_64.f__SS1_B_09_64.g__SS1_B_09_64	1.85081			-
k__Bacteria.p__Firmicutes.c__Clostridia.o__Lachnospirales.f__Lachnospiraceae	5.70411	L-NOB	5.31068	9.40508e-08
k__Bacteria.p__Deferribacterota.c__Deferribacteres.o__Deferribacterales.f__Deferribacteraceae.g__Mucispirillum	3.56775			5.68499e-06
k__Bacteria.p__Bacteroidota.c__Bacteroidia.o__Chitinophagales.f__Chitinophagaceae.g__Arachidicoccus	1.8419			-
k__Bacteria.p__Proteobacteria.c__Gammaproteobacteria.o__Cellvibrionales.f__Halieaceae	2.56289			0.0315943
k__Bacteria.p__Proteobacteria.c__Gammaproteobacteria.o__Burkholderiales.f__Oxalobacteraceae.g__Duganella	2.31659			0.0496046
k__Bacteria.p__Gemmatimonadota.Other.Other	1.66108			-
k__Bacteria.p__Chloroflexi.c__Anaerolineae.o__Anaerolineales	1.74764			-
k__Bacteria.p__Proteobacteria.c__Alphaproteobacteria.o__Rhizobiales.f__Beijerinckiaceae.g__FukuN57	1.5351			-
k__Bacteria.p__Firmicutes.c__Clostridia.o__Lachnospirales.f__Lachnospiraceae.g___Eubacterium__ruminantium_group	2.96935			3.90815e-05
k__Bacteria.p__Firmicutes.c__Clostridia.o__Lachnospirales.f__Lachnospiraceae.g__Lachnospiraceae_NK4B4_group	1.01972			-
k__Bacteria.p__Proteobacteria.c__Gammaproteobacteria.o__Burkholderiales.f__Oxalobacteraceae.g__Undibacterium	2.63679			0.00792702
k__Bacteria.p__Firmicutes.c__Clostridia.o__Oscillospirales.f__Oscillospiraceae	5.02166	S-C	4.62171	4.85682e-05
k__Bacteria.p__Acidobacteriota.c__Acidobacteriae.Other.Other.Other	2.69469			-
k__Bacteria.p__Proteobacteria.c__Gammaproteobacteria.o__Burkholderiales.f__Oxalobacteraceae.g__Oxalicibacterium	1.68947			-
k__Bacteria.p__Proteobacteria.c__Gammaproteobacteria.o__Burkholderiales.f__Sutterellaceae.g__AAP99	1.62975			-
k__Bacteria.p__Spirochaetota.c__Spirochaetia.o__Spirochaetales.f__Spirochaetaceae.g__Salinispira	1.78465			-
k__Bacteria.p__Firmicutes.c__Bacilli.o__Alicyclobacillales.f__Alicyclobacillaceae.g__Tumebacillus	1.57491			-
k__Bacteria.p__Proteobacteria.c__Alphaproteobacteria.o__Kiloniellales.f__Kiloniellaceae.g__Limibacillus	1.40619			-
k__Bacteria.p__Actinobacteriota.c__Actinobacteria.o__Micromonosporales.f__Micromonosporaceae.g__Catelliglobosispora	1.45365			-
k__Bacteria.p__Proteobacteria.c__Gammaproteobacteria.o__Aeromonadales.f__Succinivibrionaceae	3.15685			4.54461e-06
k__Bacteria.p__Myxococcota.c__Polyangia.o__Nannocystales	2.31762			-
k__Bacteria.p__Proteobacteria.c__Alphaproteobacteria.o__Rhizobiales.f__Amb_16S_1323	2.37087			0.0163188
k__Bacteria.p__Firmicutes.c__Bacilli.o__Lactobacillales.f__Aerococcaceae.g__Facklamia	0.795779			-
k__Bacteria.p__Firmicutes.c__Clostridia.o__Lachnospirales.f__Lachnospiraceae.g__ASF356	2.51407			1.18885e-05
k__Bacteria.p__Proteobacteria.c__Gammaproteobacteria.o__Vibrionales.f__Vibrionaceae.g__Vibrio	3.46552			1.71319e-06
k__Bacteria.p__Actinobacteriota.c__Actinobacteria.Other	2.43101			0.004618
k__Bacteria.p__Bacteroidota.c__Rhodothermia.o__Rhodothermales.f__Rhodothermaceae.g__uncultured	1.91727			-
k__Bacteria.p__Proteobacteria.c__Gammaproteobacteria.o__Acidiferrobacterales.f__Acidiferrobacteraceae.g__Sulfurifustis	1.73155			-
k__Bacteria.p__Proteobacteria.c__Gammaproteobacteria.o__Burkholderiales.f__uncultured.g__uncultured	1.84484			-
k__Bacteria.p__Proteobacteria.c__Alphaproteobacteria.o__Rhizobiales.f__Rhizobiaceae.g__Mesorhizobium	2.69726			0.00549219
k__Bacteria.p__Firmicutes.c__Clostridia.o__Peptostreptococcales_Tissierellales.f__Peptostreptococcaceae.g__Peptostreptococcus	1.85868			-
k__Bacteria.p__Cyanobacteria.c__Cyanobacteriia.o__Leptolyngbyales.f__Leptolyngbyaceae.g__Chamaesiphon_PCC_7430	1.95239			-
k__Bacteria.p__Bacteroidota.c__Bacteroidia.o__Bacteroidales.f__Muribaculaceae.Other	3.12503			6.99357e-06
k__Bacteria.p__Myxococcota.c__bacteriap25	2.58322			0.0012916
k__Bacteria.p__Bacteroidota.c__Bacteroidia.o__Bacteroidales.f__Prolixibacteraceae.g__WCHB1_32	2.24363			0.00792646
k__Bacteria.p__Actinobacteriota.c__Coriobacteriia.o__Coriobacteriales.f__Coriobacteriaceae.g__Collinsella	3.32039			4.01334e-06
k__Bacteria.p__Proteobacteria.c__Alphaproteobacteria.o__Rhodobacterales.f__Rhodobacteraceae.g__Paracoccus	1.75802			-
k__Bacteria.p__Elusimicrobiota.c__Lineage_IIa.o__Lineage_IIa	1.72426			-
k__Bacteria.p__Proteobacteria.c__Gammaproteobacteria.o__Gammaproteobacteria_Incertae_Sedis.f__Unknown_Family.g__Acidibacter	2.96653			1.60798e-06
k__Bacteria.p__Firmicutes.c__Clostridia.o__Lachnospirales.f__Lachnospiraceae.g__Pseudobutyrivibrio	0.32774			-
k__Bacteria.p__Firmicutes.c__Clostridia.o__Clostridiales.f__Clostridiaceae.Other	1.61666			-
k__Bacteria.p__Myxococcota.c__Polyangia.o__Polyangiales.f__Polyangiaceae.g__Pajaroellobacter	2.24696			0.0126164
k__Bacteria.p__Desulfobacterota.c__Desulfobacteria.o__Desulfatiglandales.f__Desulfatiglandaceae	1.659			-
k__Bacteria.p__Proteobacteria.c__Alphaproteobacteria.o__Rhizobiales.f__D05_2.g__D05_2	1.91418			-
k__Bacteria.p__Acidobacteriota.c__Acidobacteriae	3.91494			1.03607e-06
k__Bacteria.p__Firmicutes.c__Negativicutes.o__Veillonellales_Selenomonadales	3.39125			2.67514e-06
k__Bacteria.p__Calditrichota.c__Calditrichia.o__Calditrichales.f__Calditrichaceae.g__Calditrichaceae	1.22201			-
k__Bacteria.p__Verrucomicrobiota.c__Verrucomicrobiae.o__Verrucomicrobiales.f__DEV007	1.39207			-
k__Bacteria.p__Actinobacteriota.c__Actinobacteria.o__PeM15	2.01728			-
k__Bacteria.p__Proteobacteria.c__Gammaproteobacteria.o__KF_JG30_C25.f__KF_JG30_C25.g__KF_JG30_C25	2.02321			0.0498833
k__Bacteria.p__Actinobacteriota.c__Actinobacteria.o__Micrococcales.f__Intrasporangiaceae	2.77227			8.33329e-06
k__Bacteria.p__Proteobacteria.c__Gammaproteobacteria.o__JTB23.f__JTB23	0.311274			-
k__Bacteria.p__Firmicutes.c__Clostridia.o__Monoglobales.f__Monoglobaceae.g__Monoglobus	2.98676			2.66549e-05
k__Bacteria.p__Bacteroidota.c__Bacteroidia.o__Bacteroidales.f__Muribaculaceae.g__Muribaculaceae	5.61991	L-C	5.32176	2.83484e-08
k__Bacteria.p__Bacteroidota.c__Bacteroidia.o__Cytophagales.f__Cytophagaceae.g__Rhodocytophaga	1.41509			-
k__Bacteria.p__Actinobacteriota.c__Actinobacteria.o__Streptomycetales.f__Streptomycetaceae	3.41807			1.67149e-06
k__Bacteria.p__Actinobacteriota.c__Actinobacteria.o__Frankiales.f__Sporichthyaceae.g__hgcI_clade	2.14437			0.038503
k__Bacteria.p__Actinobacteriota.c__Actinobacteria.o__Kineosporiales	2.0558			-
k__Bacteria.p__Desulfobacterota.c__Desulfuromonadia.o__Geobacterales.f__Geobacteraceae.g__Citrifermentans	1.15262			-
k__Bacteria.p__Proteobacteria.c__Gammaproteobacteria.o__Burkholderiales.f__SC_I_84	2.91773			6.66552e-05
k__Bacteria.p__Acidobacteriota.c__Aminicenantia	1.91695			-
k__Bacteria.p__Proteobacteria.c__Alphaproteobacteria.o__Caulobacterales.f__Caulobacteraceae.g__Asticcacaulis	2.65188			0.00117878
k__Bacteria.p__Proteobacteria.c__Alphaproteobacteria.o__Rhizobiales.f__Labraceae.g__Labrys	1.74135			-
k__Bacteria.p__Elusimicrobiota.c__Lineage_IIa.o__Lineage_IIa.f__Lineage_IIa	1.72426			-
k__Bacteria.p__Proteobacteria.c__Alphaproteobacteria.o__Acetobacterales.f__Acetobacteraceae.g__Roseococcus	1.15184			-
k__Bacteria.p__Firmicutes.c__Bacilli.o__Bacillales.f__Planococcaceae.Other	1.56283			-
k__Bacteria.p__Desulfobacterota.c__Desulfuromonadia.o__Bradymonadales.f__Bradymonadales.g__Bradymonadales	2.02081			0.00792646
k__Bacteria.p__Proteobacteria.c__Gammaproteobacteria.o__Xanthomonadales.f__Xanthomonadaceae.g__Vulcaniibacterium	1.81577			-
k__Bacteria.p__Spirochaetota.c__Leptospirae	1.71126			-
k__Bacteria.p__Actinobacteriota.c__Actinobacteria.o__Micrococcales.f__Cellulomonadaceae.g__Cellulomonas	2.46684			-
k__Bacteria.p__Bacteroidota.c__Bacteroidia.o__Sphingobacteriales.f__NS11_12_marine_group.g__NS11_12_marine_group	2.41375			0.0154851
k__Bacteria.p__Firmicutes.c__Clostridia.o__Lachnospirales.f__Lachnospiraceae.g__Agathobacter	3.46665			2.4889e-06
k__Bacteria.p__Proteobacteria.c__Alphaproteobacteria.o__Rhizobiales.f__Rhizobiales_Incertae_Sedis.g__Bauldia	1.94189			-
k__Bacteria.p__Firmicutes.c__Clostridia.o__Lachnospirales.f__Lachnospiraceae.g__A2	3.60432			1.10881e-05
k__Bacteria.p__Bacteroidota.c__Bacteroidia.o__Cytophagales.f__Cyclobacteriaceae	1.62481			-
k__Bacteria.p__Proteobacteria.c__Alphaproteobacteria.o__Rhizobiales.f__Rhizobiaceae.g__uncultured	1.84806			-
k__Bacteria.p__Myxococcota.c__Polyangia.o__UASB_TL25	0.796539			-
k__Bacteria.p__Proteobacteria.c__Gammaproteobacteria.o__Burkholderiales.f__Rhodocyclaceae.g__Azovibrio	1.55302			-
k__Bacteria.p__Desulfobacterota.c__Desulfuromonadia	2.70783			3.79056e-05
k__Bacteria.p__Firmicutes.c__Bacilli.o__Erysipelotrichales.f__Erysipelotrichaceae.g__Holdemania	1.22175			-
k__Bacteria.p__Firmicutes.c__Bacilli.o__Bacillales.f__Bacillaceae.Other	0.606474			-
k__Bacteria.p__Proteobacteria.c__Gammaproteobacteria.o__Enterobacterales.f__Enterobacteriaceae.g__Escherichia_Shigella	4.93607	S-Anti	4.62674	5.98925e-08
k__Bacteria.p__Bacteroidota.c__Bacteroidia.o__Chitinophagales.f__Saprospiraceae	2.77045			7.68125e-05
k__Bacteria.p__LCP_89.c__LCP_89	1.31289			-
k__Bacteria.p__Bdellovibrionota.c__Oligoflexia.o__0319_6G20.f__0319_6G20	2.65309			2.28047e-05
k__Bacteria.p__Actinobacteriota.c__Actinobacteria.o__Corynebacteriales.f__Dietziaceae	1.51982			0.031072
k__Bacteria.p__Firmicutes.c__Clostridia.o__Clostridia.f__Hungateiclostridiaceae.g__Ruminiclostridium	1.52724			-
k__Bacteria.p__Proteobacteria.c__Gammaproteobacteria.o__Cardiobacteriales	1.81285			-
k__Bacteria.p__Proteobacteria.c__Gammaproteobacteria.o__Coxiellales.f__Coxiellaceae.g__Coxiella	1.55415			-
k__Bacteria.p__Proteobacteria.c__Gammaproteobacteria.o__Ga0077536.f__Ga0077536	1.44168			-
k__Bacteria.p__Gemmatimonadota.c__Longimicrobia.o__Longimicrobiales	3.16972			1.1988e-07
k__Bacteria.p__Actinobacteriota.c__Thermoleophilia.o__Solirubrobacterales.f__67_14.g__67_14	3.21337			2.67248e-06
k__Bacteria.p__Firmicutes.c__Clostridia.o__Lachnospirales.f__Lachnospiraceae.g___Eubacterium__fissicatena_group	4.80617	L-NR	4.51326	1.74706e-07
k__Bacteria.p__Desulfobacterota.c__Desulfuromonadia.o__PB19	1.96453			-
k__Bacteria.p__Firmicutes.c__Clostridia.o__Peptostreptococcales_Tissierellales.f__Peptostreptococcales_Tissierellales	1.88627			0.00792646
k__Bacteria.p__Verrucomicrobiota.c__Verrucomicrobiae.o__Pedosphaerales.f__Pedosphaeraceae.g__uncultured	1.77419			-
k__Bacteria.p__Firmicutes.c__Clostridia.o__Lachnospirales.f__Lachnospiraceae.g__Anaerostipes	2.98177			7.99248e-05
k__Bacteria.p__Chloroflexi.c__Dehalococcoidia.o__RBG_13_46_9.f__RBG_13_46_9	1.7166			-
k__Bacteria.p__Actinobacteriota.c__Thermoleophilia.Other.Other.Other	2.15875			0.0157564
k__Bacteria.p__Proteobacteria.c__Gammaproteobacteria.Other	2.86226			4.44079e-05
k__Bacteria.p__Proteobacteria.c__Gammaproteobacteria.o__Pseudomonadales.f__Moraxellaceae.g__Perlucidibaca	1.25925			-
k__Bacteria.p__Desulfobacterota.c__Desulfobulbia.o__Desulfobulbales.f__Desulfocapsaceae.g___Desulfobacterium__catecholicum_group	1.40175			-
k__Bacteria.p__Actinobacteriota.c__Actinobacteria.o__Micromonosporales.f__Micromonosporaceae.g__Virgisporangium	1.72892			-
k__Bacteria.p__Firmicutes.c__Clostridia.o__Peptococcales.f__Peptococcaceae.g__uncultured	3.04932			5.48487e-05
k__Bacteria.p__Proteobacteria.c__Gammaproteobacteria.o__Immundisolibacterales.f__Immundisolibacteraceae	1.64479			-
k__Bacteria.p__Verrucomicrobiota.c__Chlamydiae.o__Chlamydiales.f__Chlamydiaceae.g__Chlamydia	1.56395			-
k__Bacteria.p__FCPU426.c__FCPU426.o__FCPU426.f__FCPU426	1.80344			-
k__Bacteria.p__Firmicutes.c__Bacilli.o__Lactobacillales.Other.Other	1.13953			-
k__Bacteria.p__Proteobacteria.c__Alphaproteobacteria.o__Kiloniellales.f__Kiloniellaceae	2.12182			-
k__Bacteria.p__Proteobacteria.c__Alphaproteobacteria.o__Rhizobiales.f__Xanthobacteraceae.g__Bradyrhizobium	2.96527			1.12953e-05
k__Bacteria.p__Firmicutes.c__Bacilli.o__Thermoactinomycetales	1.62896			-
k__Bacteria.p__Bacteroidota.c__Bacteroidia.o__Chitinophagales.f__Chitinophagaceae.g__Sediminibacterium	2.44915			7.7095e-07
k__Bacteria.p__Proteobacteria.c__Alphaproteobacteria.o__Rickettsiales.Other	2.15024			-
k__Bacteria.p__Planctomycetota.c__Pla4_lineage	0.850814			-
k__Bacteria.p__WPS_2.c__WPS_2	2.59259			-
k__Bacteria.p__Proteobacteria.c__Alphaproteobacteria.o__Tistrellales.f__Geminicoccaceae.g__uncultured	2.11319			-
k__Bacteria.p__Bacteroidota.c__Bacteroidia.o__Bacteroidales.f__Bacteroidales_BS11_gut_group	1.78867			-
k__Bacteria.p__Chloroflexi.c__Dehalococcoidia.o__RBG_13_46_9	1.7166			-
k__Bacteria.p__Desulfobacterota.c__Desulfuromonadia.o__Desulfuromonadia.f__Geopsychrobacteraceae	0.662413			-
k__Bacteria.p__Proteobacteria.c__Alphaproteobacteria.o__Puniceispirillales.f__EF100_94H03	1.77157			-
k__Bacteria.p__Bacteroidota.c__Bacteroidia.o__Flavobacteriales.f__Flavobacteriaceae.g__Lutibacter	1.60414			-
k__Bacteria.p__Acidobacteriota.c__Acidobacteriae.o__Bryobacterales.f__Bryobacteraceae	3.09095			1.35634e-06
k__Bacteria.p__Myxococcota.c__Polyangia.o__Polyangiales.Other	1.7539			-
k__Bacteria.p__Acidobacteriota.c__Acidobacteriae.o__AKIW659.f__AKIW659.g__AKIW659	1.61666			-
k__Bacteria.p__Firmicutes.c__Clostridia.o__Oscillospirales.f__Ruminococcaceae.g__Faecalibacterium	4.24053			1.22162e-07
k__Bacteria.p__Actinobacteriota.c__Actinobacteria.o__Micromonosporales.f__Micromonosporaceae.g__uncultured	2.00814			-
k__Bacteria.p__Proteobacteria.c__Gammaproteobacteria.o__Enterobacterales.f__Morganellaceae.g__Providencia	1.76264			-
k__Bacteria.p__Actinobacteriota.c__Actinobacteria.o__Micromonosporales.f__Micromonosporaceae.g__Longispora	1.22201			-
k__Bacteria.p__Bacteroidota.c__Ignavibacteria.o__Ignavibacteriales	1.67246			0.0451259
k__Bacteria.p__Proteobacteria.c__Gammaproteobacteria.o__Pasteurellales.f__Pasteurellaceae.g__Actinobacillus	2.69713			1.02078e-05
k__Bacteria.p__Gemmatimonadota.c__PAUC43f_marine_benthic_group.o__PAUC43f_marine_benthic_group	2.22495			-
k__Bacteria.p__Desulfobacterota.c__Desulfobulbia.o__Desulfobulbales.Other	1.68805			-
k__Bacteria.p__Firmicutes.c__Bacilli.o__Lactobacillales.f__Vagococcaceae.g__Vagococcus	0.624146			-
k__Bacteria.p__Patescibacteria.c__Saccharimonadia.o__Saccharimonadales.f__Saccharimonadaceae	1.33127			-
k__Bacteria.p__Actinobacteriota.c__Actinobacteria.o__Catenulisporales.f__Actinospicaceae	2.29783			0.0454725
k__Bacteria.p__Desulfobacterota.c__Desulfobulbia.o__Desulfobulbales.f__Desulfocapsaceae	2.31801			0.0133723
k__Bacteria.p__Firmicutes.c__Clostridia.o__Lachnospirales.f__Lachnospiraceae.g__Lachnospiraceae_NK4A136_group	4.83198	L-NOB	4.48411	0.0185736
k__Bacteria.p__Bacteroidota.c__Bacteroidia.o__SM1A07.f__SM1A07.g__SM1A07	1.40664			-
k__Bacteria.p__Actinobacteriota.c__Acidimicrobiia.o__Actinomarinales.Other.Other	0.31601			-
k__Bacteria.p__Bacteroidota.c__Rhodothermia.o__Balneolales.f__Balneolaceae	2.07787			-
k__Bacteria.p__Proteobacteria.c__Gammaproteobacteria.o__Diplorickettsiales.f__Diplorickettsiaceae.g__uncultured	1.41509			-
k__Bacteria.p__Elusimicrobiota.c__Elusimicrobia.o__Lineage_IV	1.95026			-
k__Bacteria.p__Zixibacteria.c__Zixibacteria.o__Zixibacteria.f__Zixibacteria.g__Zixibacteria	2.03938			-
k__Bacteria.p__Bacteroidota.c__Bacteroidia.o__Flavobacteriales.f__NS9_marine_group	1.74009			-
k__Bacteria.p__Actinobacteriota.c__Actinobacteria.o__0319_7L14.f__0319_7L14	3.59282			6.51932e-07
k__Bacteria.p__Myxococcota.c__Polyangia.Other.Other.Other	1.97273			-
k__Bacteria.p__Cyanobacteria.c__Vampirivibrionia.o__Gastranaerophilales	1.37237			-
k__Bacteria.p__Spirochaetota.c__Spirochaetia.o__Spirochaetales.f__Spirochaetaceae	3.17484			1.73983e-07
k__Bacteria.p__Actinobacteriota.c__Actinobacteria.o__Streptosporangiales.f__Streptosporangiaceae.g__Nonomuraea	1.70789			-
k__Bacteria.p__Bacteroidota.c__Bacteroidia.o__Sphingobacteriales.f__Sphingobacteriaceae.g__uncultured	0.326323			-
k__Bacteria.p__Patescibacteria.c__Parcubacteria.o__Parcubacteria.f__Parcubacteria.g__Parcubacteria	1.6843			-
k__Bacteria.p__Bacteroidota.c__Bacteroidia.o__Flavobacteriales.f__Weeksellaceae.g__Empedobacter	0.606039			-
k__Bacteria.p__Myxococcota.c__Polyangia.o__Polyangiales.f__Polyangiaceae.g__uncultured	1.7454			-
k__Bacteria.p__Proteobacteria.c__Alphaproteobacteria.o__Rhodobacterales.f__Rhodobacteraceae.g__Tropicimonas	0.9298			-
k__Bacteria.p__Proteobacteria.c__Alphaproteobacteria.o__SAR11_clade	3.67566			3.30405e-07
k__Bacteria.p__Actinobacteriota.c__Acidimicrobiia.o__IMCC26256	3.20352			7.00272e-06
k__Bacteria.p__Proteobacteria.c__Gammaproteobacteria.o__Steroidobacterales.f__Steroidobacteraceae.g__Steroidobacter	2.67366			1.29085e-06
k__Bacteria.p__Proteobacteria.c__Gammaproteobacteria.o__PLTA13.f__PLTA13.g__PLTA13	2.88254			8.29747e-05
k__Bacteria.p__Firmicutes.c__Clostridia.o__Oscillospirales.f__Ruminococcaceae.g__Anaerofilum	0.322568			-
k__Bacteria.p__Proteobacteria.c__Alphaproteobacteria.o__Caulobacterales.f__Hyphomonadaceae.g__UKL13_1	2.40243			0.00325791
k__Bacteria.p__Proteobacteria.c__Alphaproteobacteria.o__Azospirillales.f__Azospirillaceae	2.41935			0.0227964
k__Bacteria.p__Proteobacteria.c__Gammaproteobacteria.o__Burkholderiales.f__Gallionellaceae.Other	0.799968			-
k__Bacteria.p__Bacteroidota.c__Bacteroidia.o__Chitinophagales.f__Chitinophagaceae.g__Flavitalea	2.09203			-
k__Bacteria.p__Firmicutes.c__Negativicutes.o__Acidaminococcales	2.09477			-
k__Bacteria.p__SAR324_clade_Marine_group_B_.c__SAR324_clade_Marine_group_B_	2.15525			-
k__Bacteria.p__Entotheonellaeota.c__Entotheonellia.o__Entotheonellales.f__Entotheonellaceae.Other	0.790013			-
k__Bacteria.p__SAR324_clade_Marine_group_B_	2.15525			-
k__Bacteria.p__Proteobacteria.c__Gammaproteobacteria.o__Burkholderiales.f__Comamonadaceae.g__Aquabacterium	2.42009			-
k__Bacteria.p__Proteobacteria.c__Gammaproteobacteria.o__MBMPE27	1.36509			-
k__Bacteria.p__Proteobacteria.c__Gammaproteobacteria.o__B2M28.f__B2M28	1.43656			-
k__Bacteria.p__Proteobacteria.c__Alphaproteobacteria.o__Caulobacterales.f__Hyphomonadaceae.g__Hirschia	2.51709			0.0109632
k__Bacteria.p__Acidobacteriota.c__Acidobacteriae.o__AKIW659.f__AKIW659	1.61666			-
k__Bacteria.p__Actinobacteriota.c__Actinobacteria.o__Frankiales.f__Acidothermaceae	3.0184			4.32965e-05
k__Bacteria.p__Proteobacteria.c__Gammaproteobacteria.o__Ga0077536	1.44168			-
k__Bacteria.p__Proteobacteria.c__Alphaproteobacteria.o__Rhizobiales.f__Rhizobiales_Incertae_Sedis.Other	1.7298			-
k__Bacteria.p__Actinobacteriota.c__Actinobacteria.o__Propionibacteriales.f__Nocardioidaceae.g__Kribbella	2.86826			8.04868e-05
k__Bacteria.p__Proteobacteria.c__Alphaproteobacteria.o__Puniceispirillales.f__SAR116_clade.g__SAR116_clade	1.51701			-
k__Bacteria.p__Firmicutes.c__Clostridia.Other.Other.Other	3.66726			4.76249e-06
k__Bacteria.p__Proteobacteria.c__Alphaproteobacteria.o__Zavarziniales	1.56312			-
k__Bacteria.p__Bdellovibrionota.c__Bdellovibrionia.o__Bacteriovoracales.f__Bacteriovoracaceae	2.13643			-
k__Bacteria.p__Proteobacteria.c__Gammaproteobacteria.o__Vibrionales.f__Vibrionaceae.g__Enterovibrio	1.80344			-
k__Bacteria.p__Firmicutes.c__Clostridia.o__Clostridiales.f__Caloramatoraceae.g__Fonticella	1.02671			-
k__Bacteria.p__Proteobacteria.c__Gammaproteobacteria.o__Burkholderiales.f__Rhodocyclaceae.g__Dechloromonas	2.50779			2.60505e-05
k__Bacteria.p__Firmicutes.c__Clostridia.o__Oscillospirales.f__Ruminococcaceae.g__Harryflintia	2.9043			7.26539e-06
k__Bacteria.p__Bacteroidota.c__Bacteroidia.o__Bacteroidales.f__Tannerellaceae.Other	1.81799			3.78932e-06
k__Bacteria.p__Proteobacteria.c__Gammaproteobacteria.o__Diplorickettsiales.f__Diplorickettsiaceae	2.30272			0.00708064
k__Bacteria.p__Acidobacteriota.c__Aminicenantia.o__Aminicenantales.f__Aminicenantales	1.91695			-
k__Bacteria.p__Elusimicrobiota.c__Elusimicrobia.o__Lineage_IV.f__Lineage_IV.g__Lineage_IV	1.95026			-
k__Bacteria.p__Actinobacteriota.c__Thermoleophilia.o__Gaiellales.f__Gaiellales	1.88071			-
k__Bacteria.p__Gemmatimonadota.c__PAUC43f_marine_benthic_group.o__PAUC43f_marine_benthic_group.f__PAUC43f_marine_benthic_group	2.22495			-
k__Bacteria.p__Proteobacteria.c__Alphaproteobacteria.o__Micropepsales.f__Micropepsaceae.Other	1.64014			-
k__Bacteria.p__Proteobacteria.c__Alphaproteobacteria.o__Rhodospirillales.f__Rhodospirillaceae.g__uncultured	1.78846			-
k__Bacteria.p__Bacteroidota.c__Rhodothermia.o__Balneolales	2.07787			-
k__Bacteria.p__Firmicutes.c__Bacilli.o__Lactobacillales.f__Aerococcaceae.g__Abiotrophia	2.03461			-
k__Bacteria.p__Chloroflexi.c__Dehalococcoidia.o__SAR202_clade.f__SAR202_clade	1.88731			-
k__Bacteria.p__Bacteroidota.c__Bacteroidia.o__Bacteroidales.f__p_251_o5	1.97447			0.0368029
k__Bacteria.p__Acidobacteriota.c__Acidobacteriae.o__Acidobacteriales.f__Acidobacteriaceae__Subgroup_1_.g__uncultured	2.15228			-
k__Bacteria.p__Proteobacteria.c__Alphaproteobacteria.o__Acetobacterales.f__Acetobacteraceae.g__Roseomonas	2.15094			0.0253973
k__Bacteria.p__Bacteroidota.c__Bacteroidia.o__Sphingobacteriales.f__KD3_93.g__KD3_93	1.54911			-
k__Bacteria.p__NB1_j.c__NB1_j.o__NB1_j.f__NB1_j.g__NB1_j	2.21128			-
k__Bacteria.p__Bacteroidota.c__Bacteroidia.o__Chitinophagales.f__Chitinophagaceae.g__uncultured	2.44594			0.000160011
k__Bacteria.p__Proteobacteria.c__Gammaproteobacteria.o__Immundisolibacterales.f__Immundisolibacteraceae.g__Immundisolibacter	1.64479			-
k__Bacteria.p__Actinobacteriota.c__Actinobacteria	4.47592	S-NOB	4.17065	6.82152e-08
k__Bacteria.p__Actinobacteriota.c__Thermoleophilia.o__Gaiellales	3.6439			2.62793e-06
k__Bacteria.p__Actinobacteriota.c__Actinobacteria.o__Streptosporangiales.Other.Other	1.42684			-
k__Bacteria.p__Actinobacteriota.c__Actinobacteria.o__Frankiales.f__Acidothermaceae.g__Acidothermus	3.0184			4.32965e-05
k__Bacteria.p__Proteobacteria.c__Alphaproteobacteria.o__Rhizobiales.f__C2U	1.6472			-
k__Bacteria.p__Bacteroidota.c__Bacteroidia.o__Cytophagales.f__Cytophagaceae	1.95704			-
k__Bacteria.p__Acidobacteriota.c__Blastocatellia.o__Pyrinomonadales.f__Pyrinomonadaceae.g__RB41	1.72568			-
k__Bacteria.p__Actinobacteriota.c__Actinobacteria.o__Pseudonocardiales	3.23361			3.86736e-06
k__Bacteria.p__Desulfobacterota.c__uncultured.o__uncultured.f__uncultured	2.3375			0.018647
k__Bacteria.p__Proteobacteria.c__Alphaproteobacteria.o__Elsterales.f__uncultured	2.7967			1.44684e-05
k__Bacteria.p__Firmicutes.c__Clostridia.o__Eubacteriales	1.9946			2.84608e-06
k__Bacteria.p__Firmicutes.c__Clostridia.o__Lachnospirales.f__Lachnospiraceae.g__CAG_56	2.20678			-
k__Bacteria.p__Proteobacteria.c__Alphaproteobacteria.o__Ferrovibrionales	2.57777			0.0275636
k__Bacteria.p__Spirochaetota	3.34047			8.80035e-08
k__Bacteria.p__Bacteroidota.c__Bacteroidia.o__Flavobacteriales.f__Weeksellaceae.g__Chryseobacterium	2.28846			0.0112089
k__Bacteria.p__Proteobacteria.c__Gammaproteobacteria.o__Cellvibrionales.f__Cellvibrionaceae.g__Cellvibrio	1.75021			-
k__Bacteria.p__Actinobacteriota.c__Actinobacteria.o__Pseudonocardiales.f__Pseudonocardiaceae.g__Saccharothrix	0.907483			-
k__Bacteria.p__Actinobacteriota.c__Actinobacteria.o__Glycomycetales.f__Glycomycetaceae	2.21866			-
k__Bacteria.p__Bdellovibrionota.c__Bdellovibrionia.o__Bacteriovoracales.f__Bacteriovoracaceae.g__Bacteriovorax	1.81467			-
k__Bacteria.p__Actinobacteriota.Other.Other.Other	2.7004			3.39941e-07
k__Bacteria.p__Firmicutes.c__D8A_2	1.83124			-
k__Bacteria.p__Actinobacteriota.c__Actinobacteria.o__Propionibacteriales.f__Nocardioidaceae.g__Aeromicrobium	2.4021			0.00713342
k__Bacteria.p__WPS_2.c__WPS_2.o__WPS_2.f__WPS_2	2.59259			-
k__Bacteria.p__Firmicutes.c__Clostridia.o__Oscillospirales.f__Butyricicoccaceae.g__Butyricicoccus	2.78756			3.78144e-05
k__Bacteria.p__Proteobacteria.c__Alphaproteobacteria.o__Paracaedibacterales.f__Paracaedibacteraceae	1.54176			-
k__Bacteria.p__Actinobacteriota.c__Actinobacteria.o__Streptosporangiales.Other	1.42684			-
k__Bacteria.p__Actinobacteriota.c__Thermoleophilia.o__Solirubrobacterales.Other.Other	2.43199			0.0367908
k__Bacteria.p__Proteobacteria.c__Alphaproteobacteria.o__Rhizobiales.f__Rhizobiaceae.g__Chelativorans	1.8133			-
k__Bacteria.p__Bacteroidota.c__Ignavibacteria	1.67246			0.0451259
k__Bacteria.p__Latescibacterota.c__Latescibacterota.o__Latescibacterota.f__Latescibacterota.g__Latescibacterota	1.94275			-
k__Bacteria.p__Acidobacteriota.c__Holophagae.o__Holophagales.f__Holophagaceae.g__Geothrix	2.70376			0.00248562
k__Bacteria.p__Desulfobacterota.c__Desulfuromonadia.o__Bradymonadales.f__Bradymonadales	2.02081			0.00792646
k__Bacteria.p__Cyanobacteria.c__Vampirivibrionia.o__Gastranaerophilales.f__Gastranaerophilales	1.37237			-
k__Bacteria.p__Proteobacteria.c__Gammaproteobacteria.o__Enterobacterales.f__Morganellaceae.g__Proteus	2.97938			0.000403194
k__Bacteria.p__Proteobacteria.c__Alphaproteobacteria.o__Rhodobacterales.f__Rhodobacteraceae.g__Ruegeria	3.53016			7.15868e-07
k__Bacteria.p__Actinobacteriota.c__Actinobacteria.o__Corynebacteriales.f__Nocardiaceae.g__Nocardia	2.41979			0.00695095
k__Bacteria.p__Proteobacteria.c__Gammaproteobacteria.o__Oceanospirillales.f__Pseudohongiellaceae.g__BIyi10	2.08992			-
k__Bacteria.p__Bacteroidota.c__Bacteroidia.o__Bacteroidales.f__Prevotellaceae.g__Prevotella	4.75769	S-Anti	4.44099	1.25603e-06
k__Bacteria.p__Bacteroidota.c__Bacteroidia.o__Bacteroidales.f__Prevotellaceae.g__Alloprevotella	4.30129	S-C	4.02546	1.74098e-06
k__Bacteria.p__Proteobacteria.c__Alphaproteobacteria.o__Rhizobiales.f__C2U.g__C2U	1.6472			-
k__Bacteria.p__Gemmatimonadota.c__MD2902_B12.o__MD2902_B12.f__MD2902_B12	1.37369			-
k__Bacteria.p__Actinobacteriota.c__Actinobacteria.o__Micromonosporales.f__Micromonosporaceae.g__Luedemannella	2.35794			-
k__Bacteria.p__Proteobacteria.c__Alphaproteobacteria.o__Rhizobiales.f__Xanthobacteraceae.Other	3.02883			5.01299e-06
k__Bacteria.p__Myxococcota.c__Polyangia.o__Haliangiales.f__Haliangiaceae.g__Haliangium	2.94458			0.000340781
k__Bacteria.p__Proteobacteria.c__Alphaproteobacteria.o__Rhizobiales.f__uncultured	2.74021			0.00711491
k__Bacteria.p__Chloroflexi.c__Dehalococcoidia	2.0956			-
k__Bacteria.p__Actinobacteriota.c__Acidimicrobiia	3.86174			1.02759e-06
k__Bacteria.p__Proteobacteria.c__Alphaproteobacteria.o__Rhizobiales.f__Rhizobiales_Incertae_Sedis	3.03038			7.39622e-06
k__Bacteria.p__Firmicutes.c__Clostridia.o__Clostridia.f__Hungateiclostridiaceae	2.33974			-
k__Bacteria.p__Proteobacteria.c__Gammaproteobacteria.o__B2M28	1.43656			-
k__Bacteria.p__Proteobacteria.c__Gammaproteobacteria.o__Burkholderiales.f__Comamonadaceae.g__Inhella	1.50707			-
k__Bacteria.p__Proteobacteria.c__Gammaproteobacteria.o__211ds20.f__211ds20	1.84118			0.00792646
k__Bacteria.p__Proteobacteria.c__Alphaproteobacteria.o__Rhodospirillales.f__Magnetospiraceae	1.77814			-
k__Bacteria.p__Proteobacteria.c__Alphaproteobacteria.o__Rhizobiales.f__Methyloligellaceae.g__uncultured	2.08652			-
k__Bacteria.p__Firmicutes.c__Clostridia	5.9217	L-NR	5.52507	1.0135e-07
k__Bacteria.p__Actinobacteriota.c__Coriobacteriia.o__Coriobacteriales.f__Eggerthellaceae.g__Enterorhabdus	3.69663			0.000216013
k__Bacteria.p__Acidobacteriota.c__Blastocatellia.o__Pyrinomonadales.f__Pyrinomonadaceae	1.72568			-
k__Bacteria.p__Myxococcota.c__bacteriap25.o__bacteriap25.f__bacteriap25	2.58322			0.0012916
k__Bacteria.p__Deinococcota	1.64995			-
k__Bacteria.p__Proteobacteria.c__Alphaproteobacteria.o__Sphingomonadales.f__Sphingomonadaceae.g__Rhizorhapis	2.00127			7.00003e-05
k__Bacteria.p__Acidobacteriota.c__Blastocatellia.o__Pyrinomonadales	1.72568			-
k__Bacteria.p__Proteobacteria.c__Gammaproteobacteria.o__Xanthomonadales.f__Rhodanobacteraceae.g__Mizugakiibacter	0.896807			-
k__Bacteria.p__Firmicutes.c__Clostridia.o__Eubacteriales.f__Anaerofustaceae	1.9946			1.40992e-07
k__Bacteria.p__Actinobacteriota.c__Actinobacteria.o__Micrococcales.f__Microbacteriaceae.g__Candidatus_Aquiluna	1.97625			0.00138322
k__Bacteria.p__Campilobacterota.c__Campylobacteria.o__Campylobacterales.f__Campylobacteraceae	2.69709			4.79151e-05
k__Bacteria.p__Acidobacteriota.c__Thermoanaerobaculia.o__Thermoanaerobaculales.f__Thermoanaerobaculaceae.g__Subgroup_23	2.19317			-
k__Bacteria.p__Myxococcota.c__Polyangia.o__mle1_27	2.01432			-
k__Bacteria.p__Proteobacteria.c__Alphaproteobacteria.o__Rhizobiales.f__KF_JG30_B3.g__KF_JG30_B3	2.12775			-
k__Bacteria.p__Gemmatimonadota.c__AKAU4049	1.99375			-
k__Bacteria.p__Spirochaetota.c__MVP_15.o__MVP_15.f__MVP_15.g__MVP_15	1.72568			-
k__Bacteria.p__Acidobacteriota.c__Holophagae.o__Subgroup_7.f__Subgroup_7.g__Subgroup_7	3.12022			2.92532e-06
k__Bacteria.p__Proteobacteria.c__Gammaproteobacteria.o__Burkholderiales.f__Comamonadaceae.g__Pelomonas	3.05047			4.65473e-06
k__Bacteria.p__Firmicutes.c__Bacilli.Other.Other	0.624732			-
k__Bacteria.p__Actinobacteriota.c__Coriobacteriia.o__Coriobacteriales.f__uncultured	1.40978			-
k__Bacteria.p__Firmicutes.c__Clostridia.o__Peptostreptococcales_Tissierellales.f__Anaerovoracaceae	4.04919			0.00270856
k__Bacteria.p__Gemmatimonadota.c__PAUC43f_marine_benthic_group	2.22495			-
k__Bacteria.p__Chloroflexi.c__Anaerolineae.o__Ardenticatenales.f__Ardenticatenaceae	1.79275			-
k__Bacteria.p__Proteobacteria.c__Alphaproteobacteria.o__Puniceispirillales.f__SAR116_clade	1.70891			-
k__Bacteria.p__Proteobacteria.c__Alphaproteobacteria.o__Rhodospirillales.f__uncultured.g__uncultured	2.90587			6.7978e-05
k__Bacteria.p__Proteobacteria.c__Alphaproteobacteria.o__Kiloniellales	2.12182			-
k__Bacteria.p__Bacteroidota.c__Bacteroidia.o__Cytophagales.f__Cyclobacteriaceae.g__uncultured	1.62481			0.0408519
k__Bacteria.p__Desulfobacterota.c__Desulfuromonadia.o__PB19.f__PB19.g__PB19	1.96453			-
k__Bacteria.p__Bacteroidota.c__Bacteroidia.o__Bacteroidales.f__Tannerellaceae.g__Tannerella	1.44728			-
k__Bacteria.p__Firmicutes.Other	2.27074			0.00568491
k__Bacteria.p__Firmicutes.c__Negativicutes.o__Veillonellales_Selenomonadales.f__Veillonellaceae.g__Allisonella	2.05088			0.0355552
k__Bacteria.p__Firmicutes.c__Bacilli.o__Erysipelotrichales.f__Erysipelotrichaceae.g___Clostridium__innocuum_group	4.93106	L-NOB	4.60247	1.0002e-06
k__Bacteria.p__Acidobacteriota.c__Acidobacteriae.o__Acidobacteriales.f__Acidobacteriaceae__Subgroup_1_.g__Edaphobacter	2.33616			1.01771e-06
k__Bacteria.p__Firmicutes.c__Bacilli.o__Erysipelotrichales.f__Erysipelatoclostridiaceae.g__Erysipelatoclostridium	4.25813			1.87483e-07
k__Bacteria.p__Latescibacterota	2.15764			-
k__Bacteria.p__Proteobacteria.c__Alphaproteobacteria.o__Rhizobiales.f__Kaistiaceae.g__Kaistia	1.37391			-
k__Bacteria.p__Proteobacteria.c__Gammaproteobacteria.o__Ectothiorhodospirales	1.98573			-
k__Bacteria.p__Proteobacteria.c__Alphaproteobacteria.o__Acetobacterales.f__Acetobacteraceae.Other	2.91336			0.000366232
k__Bacteria.p__Proteobacteria.c__Alphaproteobacteria.o__Dongiales.f__Dongiaceae	3.05874			1.91198e-06
k__Bacteria.p__Actinobacteriota.c__Actinobacteria.o__Propionibacteriales.f__Nocardioidaceae.g__Tenggerimyces	1.60414			-
k__Bacteria.p__Proteobacteria.c__Gammaproteobacteria.o__Burkholderiales.f__Rhodocyclaceae.g__Azospira	0.315981			-
k__Bacteria.p__Actinobacteriota.c__Thermoleophilia.o__Gaiellales.f__Gaiellaceae	2.98698			5.66799e-06
k__Bacteria.p__Bacteroidota.c__Bacteroidia.o__Sphingobacteriales.f__env_OPS_17.g__env_OPS_17	2.36583			-
k__Bacteria.p__Firmicutes.c__Bacilli.o__Erysipelotrichales.f__Erysipelotrichaceae.g__Ileibacterium	1.46271			-
k__Bacteria.p__Actinobacteriota.c__Coriobacteriia.o__CG2_30_50_142.f__CG2_30_50_142.g__CG2_30_50_142	1.80474			-
k__Bacteria.p__Proteobacteria.c__Gammaproteobacteria.o__Xanthomonadales.f__Xanthomonadaceae.g__uncultured	2.25279			-
k__Bacteria.p__Firmicutes.c__Clostridia.o__Lachnospirales.f__Lachnospiraceae.g___Eubacterium__ventriosum_group	3.00395			0.000596813
k__Bacteria.p__Verrucomicrobiota.c__Chlamydiae.o__Chlamydiales.f__Parachlamydiaceae.g__Candidatus_Protochlamydia	2.28583			-
k__Bacteria.p__Actinobacteriota.c__Actinobacteria.Other.Other	2.43101			0.004618
k__Bacteria.p__Firmicutes.c__Clostridia.o__Oscillospirales.f__Oscillospiraceae.g__UCG_005	3.33763			6.93073e-06
k__Bacteria.p__Firmicutes.c__Clostridia.o__Oscillospirales.f__Oscillospiraceae.g__UCG_007	0.919211			-
k__Bacteria.p__Firmicutes.c__Clostridia.o__Oscillospirales.f__Oscillospiraceae.g__UCG_003	2.75832			0.000270951
k__Bacteria.p__Firmicutes.c__Clostridia.o__Oscillospirales.f__Oscillospiraceae.g__UCG_002	3.82706			2.03881e-07
k__Bacteria.p__Verrucomicrobiota.c__Verrucomicrobiae.o__Pedosphaerales.f__Pedosphaeraceae.g__Pedosphaeraceae	2.24137			0.00295794
k__Bacteria.p__Bacteroidota.c__Bacteroidia.o__Chitinophagales.f__Saprospiraceae.g__Phaeodactylibacter	1.94519			-
k__Bacteria.p__Bacteroidota.c__Bacteroidia.o__Bacteroidales.f__Rikenellaceae.g__Alistipes	4.56877	L-C	4.25111	3.02937e-07
k__Bacteria.p__Actinobacteriota.c__Coriobacteriia.o__Coriobacteriales.f__Eggerthellaceae.g__Slackia	1.86318			-
k__Bacteria.p__Actinobacteriota.c__Acidimicrobiia.o__Actinomarinales	2.7486			4.31062e-05
k__Bacteria.p__Firmicutes.c__Bacilli.o__Erysipelotrichales.f__Erysipelotrichaceae.g__Faecalibaculum	4.94996	L-C	4.61366	1.51261e-06
k__Bacteria.p__Proteobacteria.c__Alphaproteobacteria.o__Rhizobiales.f__Devosiaceae	3.07288			1.29738e-06
k__Bacteria.p__Chloroflexi.c__Ktedonobacteria.o__Ktedonobacterales.f__Ktedonobacteraceae.g__1921_3	1.88746			-
k__Bacteria.p__Proteobacteria.c__Gammaproteobacteria.o__Burkholderiales.f__SC_I_84.g__SC_I_84	2.91773			6.66552e-05
k__Bacteria.p__Proteobacteria.c__Gammaproteobacteria.o__Pseudomonadales.f__Moraxellaceae	3.87419			9.77548e-07
k__Bacteria.p__Proteobacteria.c__Gammaproteobacteria.o__Burkholderiales.f__Burkholderiaceae.g__Burkholderia_Caballeronia_Paraburkholderia	3.47891			1.79493e-06
k__Bacteria.p__Proteobacteria.c__Gammaproteobacteria.o__Aeromonadales	3.17388			5.28647e-06
k__Bacteria.p__Bacteroidota.c__Bacteroidia.o__Bacteroidales.f__uncultured.g__uncultured	2.21428			3.89942e-05
k__Bacteria.p__Campilobacterota.c__Campylobacteria.o__Campylobacterales.f__Arcobacteraceae.g__uncultured	2.8769			2.15878e-06
k__Bacteria.p__Bacteroidota.c__Bacteroidia.o__Chitinophagales.f__uncultured.g__uncultured	2.18781			-
k__Bacteria.p__Proteobacteria.c__Alphaproteobacteria.o__Sphingomonadales.f__Sphingomonadaceae.g__Altererythrobacter	3.19255			1.53068e-06
k__Bacteria.p__Proteobacteria.c__Alphaproteobacteria.o__Rickettsiales.f__Rickettsiaceae.Other	1.66241			-
k__Bacteria.p__Spirochaetota.c__Spirochaetia.o__Spirochaetales.f__Spirochaetaceae.g__Sediminispirochaeta	1.71706			-
k__Bacteria.p__Proteobacteria.c__Alphaproteobacteria.o__Caulobacterales.Other	2.02175			-
k__Bacteria.p__Patescibacteria.c__Gracilibacteria.o__Absconditabacteriales__SR1_.f__Absconditabacteriales__SR1_	2.43088			0.000931335
k__Bacteria.p__Proteobacteria.c__Gammaproteobacteria.o__Vibrionales.f__Vibrionaceae.Other	1.48053			-
k__Bacteria.p__Desulfobacterota.c__Desulfovibrionia.o__Desulfovibrionales.f__Desulfovibrionaceae.g__uncultured	4.07507			4.61641e-07
k__Bacteria.p__Actinobacteriota.c__Actinobacteria.o__Frankiales.f__Frankiaceae	2.38146			0.00855162
k__Bacteria.p__Armatimonadota.c__Fimbriimonadia.o__Fimbriimonadales.f__Fimbriimonadaceae	1.76931			-
k__Bacteria.p__Proteobacteria.c__Gammaproteobacteria.o__Burkholderiales.f__B1_7BS.g__B1_7BS	1.6388			-
k__Bacteria.p__Proteobacteria.c__Alphaproteobacteria.o__Rhizobiales.f__Xanthobacteraceae.g__Pseudolabrys	2.7391			0.00276099
k__Bacteria.p__Proteobacteria.c__Gammaproteobacteria.o__Burkholderiales.f__Alcaligenaceae.g__Castellaniella	2.12914			-
k__Bacteria.p__Proteobacteria.c__Gammaproteobacteria.o__Alteromonadales.f__Shewanellaceae	2.23586			-
k__Bacteria.p__Chloroflexi.c__Ktedonobacteria.o__Ktedonobacterales.f__Ktedonobacteraceae.Other	1.86718			-
k__Bacteria.p__Bacteroidota.c__Bacteroidia.o__Flavobacteriales.f__Weeksellaceae.Other	1.64088			-
k__Bacteria.p__Proteobacteria.c__Gammaproteobacteria.o__Thiomicrospirales.f__Thioglobaceae	1.66805			-
k__Bacteria.p__Firmicutes.c__Clostridia.o__Peptostreptococcales_Tissierellales.f__Anaerovoracaceae.g__Family_XIII_UCG_001	1.87673			0.0201033
k__Bacteria.p__Firmicutes.c__Clostridia.o__Oscillospirales.f__Ruminococcaceae.g__UCG_001	1.76973			-
k__Bacteria.p__Desulfobacterota.c__Desulfobulbia.o__Desulfobulbales.f__Desulfobulbaceae.g__uncultured	1.92453			0.035094
k__Bacteria.p__Proteobacteria.c__Gammaproteobacteria.o__Burkholderiales.f__TRA3_20.g__TRA3_20	3.19169			1.42059e-06
k__Bacteria.p__Proteobacteria.c__Gammaproteobacteria.o__Cellvibrionales.f__Halieaceae.g__Halioglobus	2.20782			0.0162188
k__Bacteria.p__Proteobacteria.c__Gammaproteobacteria.o__Steroidobacterales	3.21617			2.53948e-07
k__Bacteria.p__Firmicutes.c__Bacilli.Other.Other.Other	0.624732			-
k__Bacteria.p__Actinobacteriota.c__Actinobacteria.o__Micrococcales.f__Micrococcaceae.g__Glutamicibacter	1.30083			0.00167391
k__Bacteria.p__Campilobacterota.c__Campylobacteria.o__Campylobacterales	3.54283			3.67451e-06
k__Bacteria.p__Latescibacterota.c__Latescibacteria	1.74905			-
k__Bacteria.p__Proteobacteria.c__Alphaproteobacteria.o__Rhodospirillales.f__Magnetospirillaceae.g__uncultured	1.77348			-
k__Bacteria.p__Acidobacteriota.c__Acidobacteriae.o__Acidobacteriae.f__Acidobacteriae.g__Paludibaculum	1.8165			-
k__Bacteria.p__Bacteroidota.c__Bacteroidia.o__Bacteroidales.f__PeH15	0.344531			-
k__Bacteria.p__Bacteroidota.c__Bacteroidia.o__Chitinophagales	3.58747			8.31539e-07
k__Bacteria.p__Gemmatimonadota.Other.Other.Other	1.66108			-
k__Bacteria.p__Bacteroidota.c__Bacteroidia.o__Flavobacteriales.f__Flavobacteriaceae.Other	1.59638			-
k__Bacteria.p__Acidobacteriota.c__Acidobacteriae.o__Acidobacteriales.f__Acidobacteriales	2.09931			-
k__Bacteria.p__RCP2_54.c__RCP2_54.o__RCP2_54.f__RCP2_54	2.64464			0.000300961
k__Bacteria.p__Firmicutes.Other.Other	2.27074			0.00568491
k__Bacteria.p__Actinobacteriota.c__Actinobacteria.o__Frankiales.f__Frankiaceae.g__Jatrophihabitans	2.37765			0.00855162
k__Bacteria.p__Proteobacteria.c__Alphaproteobacteria.o__Rhizobiales.f__Rhodomicrobiaceae.g__Rhodomicrobium	1.73964			-
k__Bacteria.p__Acidobacteriota.c__Acidobacteriae.o__Subgroup_2.f__Subgroup_2.g__Subgroup_2	2.24225			-
k__Bacteria.p__Bacteroidota.c__Bacteroidia.o__Bacteroidales.f__Prevotellaceae.g__Paraprevotella	2.89118			1.16867e-05
k__Bacteria.p__Firmicutes.c__Clostridia.o__Peptococcales.f__Peptococcaceae	3.24533			1.58013e-06
k__Bacteria.p__Actinobacteriota.c__Actinobacteria.o__Micrococcales.f__Micrococcaceae.g__Arthrobacter	0.98851			-
k__Bacteria.p__Bacteroidota.c__Bacteroidia.o__Flavobacteriales.f__Crocinitomicaceae.Other	1.84572			-
k__Bacteria.p__Cyanobacteria.c__Cyanobacteriia.o__Cyanobacteriales.Other.Other	1.77982			-
k__Bacteria.p__Proteobacteria.c__Alphaproteobacteria.o__Rhizobiales.f__Devosiaceae.g__Devosia	3.0554			2.76583e-06
k__Bacteria.p__Firmicutes.c__Clostridia.o__Lachnospirales.f__Lachnospiraceae.g__Butyrivibrio	2.07453			-
k__Bacteria.p__Proteobacteria.c__Alphaproteobacteria.o__Rhizobiales.f__Beijerinckiaceae.g__alphaI_cluster	1.6619			-
k__Bacteria.p__Firmicutes.c__Clostridia.o__Oscillospirales.f__Ruminococcaceae.g___Eubacterium__siraeum_group	2.58306			0.000370666
k__Bacteria.p__Desulfobacterota.c__Desulfuromonadia.o__Sva1033.f__Sva1033.g__Sva1033	1.9748			0.0478705
k__Bacteria.p__Actinobacteriota.c__Actinobacteria.o__Micromonosporales.f__Micromonosporaceae	3.18407			4.74159e-07
k__Bacteria.p__Firmicutes.c__Bacilli.o__Erysipelotrichales.f__Erysipelatoclostridiaceae.g__Coprobacillus	3.09919			0.00809444
k__Bacteria.p__Bacteroidota.c__Bacteroidia.o__Chitinophagales.f__Chitinophagaceae.g__Lacibacter	2.107			0.0490295
k__Bacteria.p__Myxococcota.c__Polyangia.o__Blfdi19.f__Blfdi19.g__Blfdi19	2.19156			-
k__Bacteria.p__Myxococcota.c__Polyangia.o__UASB_TL25.f__UASB_TL25.g__UASB_TL25	0.796539			-
k__Bacteria.p__Firmicutes.c__Bacilli.o__Lactobacillales.f__Lactobacillaceae.g__Lactobacillus	4.68543	L-C	4.33644	6.55394e-07
k__Bacteria.p__Proteobacteria.c__Gammaproteobacteria.o__Pasteurellales.f__Pasteurellaceae.g__Muribacter	2.58404			0.0112719
k__Bacteria.p__Firmicutes.c__Clostridia.o__Oscillospirales.f__Ruminococcaceae.g__Phocea	1.92082			-
k__Bacteria.p__Latescibacterota.c__Latescibacterota.o__Latescibacterota.f__Latescibacterota	1.94275			-
k__Bacteria.p__Chloroflexi.c__Anaerolineae.Other.Other.Other	1.72426			-
k__Bacteria.p__WPS_2.c__WPS_2.o__WPS_2.f__WPS_2.g__WPS_2	2.59259			-
k__Bacteria.p__Verrucomicrobiota.c__Verrucomicrobiae.o__Verrucomicrobiales.f__Akkermansiaceae	1.35428			-
k__Bacteria.p__Chloroflexi.c__Ktedonobacteria.o__C0119.f__C0119	2.43052			-
k__Bacteria.p__Firmicutes.c__Clostridia.o__Peptostreptococcales_Tissierellales.f__Dethiosulfatibacteraceae.g__Dethiosulfatibacter	0.312892			-
k__Bacteria.p__Proteobacteria.c__Gammaproteobacteria.o__Xanthomonadales.f__Xanthomonadaceae.g__Luteimonas	2.22629			0.0397404
k__Bacteria.p__Bacteroidota.c__Rhodothermia.o__Rhodothermales	1.91727			-
k__Bacteria.p__SAR324_clade_Marine_group_B_.c__SAR324_clade_Marine_group_B_.o__SAR324_clade_Marine_group_B_.f__SAR324_clade_Marine_group_B_.g__SAR324_clade_Marine_group_B_	2.15525			-
k__Bacteria.p__Proteobacteria.c__Alphaproteobacteria.o__Paracaedibacterales	1.54176			-
k__Bacteria.p__Proteobacteria.c__Gammaproteobacteria.o__Burkholderiales.f__Alcaligenaceae.g__Oligella	0.617099			-
k__Bacteria.p__Firmicutes.c__D8A_2.o__D8A_2	1.83124			-
k__Bacteria.p__Firmicutes.c__Clostridia.o__Oscillospirales.f___Eubacterium__coprostanoligenes_group.g___Eubacterium__coprostanoligenes_group	4.06025			1.23489e-05
k__Bacteria.p__Proteobacteria.c__Gammaproteobacteria.o__1013_28_CG33.f__1013_28_CG33	1.80153			-
k__Bacteria.p__Verrucomicrobiota	2.70827			0.000374772
k__Bacteria.p__Spirochaetota.c__Spirochaetia.o__Spirochaetales.f__Spirochaetaceae.g__M2PT2_76_termite_group	1.93473			-
k__Bacteria.p__Actinobacteriota.c__Actinobacteria.o__Micrococcales.f__Microbacteriaceae.Other	1.97325			-
k__Bacteria.p__Proteobacteria	5.40001	S-Anti	5.09416	7.20892e-08
k__Bacteria.p__Proteobacteria.c__Gammaproteobacteria.o__Burkholderiales.f__Rhodocyclaceae.g__Zoogloea	1.92992			-
k__Bacteria.p__Firmicutes.c__Bacilli.o__Erysipelotrichales.f__Erysipelotrichaceae.Other	2.7897			0.000395793
k__Bacteria.p__Proteobacteria.c__Alphaproteobacteria.o__Acetobacterales.f__Acetobacteraceae.g__Rhodovastum	0.606039			-
k__Bacteria.p__Chloroflexi.c__Anaerolineae.o__Anaerolineales.f__Anaerolineaceae.g__uncultured	1.74764			-
k__Bacteria.p__Proteobacteria.c__Gammaproteobacteria.o__Enterobacterales.f__Enterobacteriaceae.g__Cronobacter	1.84934			0.0406649
k__Bacteria.p__Desulfobacterota.c__Desulfuromonadia.Other	0.596385			-
k__Bacteria.p__Bacteroidota.c__Rhodothermia	2.2272			-
k__Bacteria.p__Desulfobacterota.c__Desulfuromonadia.o__Desulfuromonadia.Other.Other	1.78741			-
k__Bacteria.p__Proteobacteria.c__Gammaproteobacteria.o__Burkholderiales.f__Alcaligenaceae	2.71147			4.41e-05
k__Bacteria.p__Elusimicrobiota.c__Lineage_IIa	1.72426			-
k__Bacteria.p__Elusimicrobiota.c__Lineage_IIc	1.69439			-
k__Bacteria.p__Elusimicrobiota.c__Lineage_IIb	1.91495			-
k__Bacteria.p__Actinobacteriota.c__Actinobacteria.o__Frankiales.f__Geodermatophilaceae.g__Klenkia	1.89118			-
k__Bacteria.p__Proteobacteria.c__Alphaproteobacteria.o__Rhizobiales.f__Methyloligellaceae.g__Methyloligellaceae	1.81828			-
k__Bacteria.p__Acidobacteriota.c__Acidobacteriae.Other.Other	2.69469			-
k__Bacteria.p__Proteobacteria.c__Alphaproteobacteria.o__SAR11_clade.f__Clade_III	2.78262			7.66941e-05
k__Bacteria.p__Acidobacteriota.c__Acidobacteriae.o__Acidobacteriales.f__Acidobacteriaceae__Subgroup_1_.Other	2.6968			0.0309283
k__Bacteria.p__Verrucomicrobiota.c__Lentisphaeria.o__Oligosphaerales.f__Lenti_02.g__Lenti_02	1.57897			-
k__Bacteria.p__Myxococcota.c__Polyangia.o__MidBa8.f__MidBa8.g__MidBa8	1.53798			-
k__Bacteria.p__Bacteroidota.c__Ignavibacteria.o__Ignavibacteriales.f__BSV40.g__BSV40	1.66499			-
k__Bacteria.p__Myxococcota.c__Polyangia.o__Polyangiales.f__Polyangiaceae.g__Polyangium	0.597574			-
k__Bacteria.p__Bacteroidota.c__Bacteroidia.o__Bacteroidales.f__Marinilabiliaceae.g__uncultured	1.54946			-
k__Bacteria.p__Bacteroidota.c__Bacteroidia.o__Chitinophagales.f__Chitinophagaceae.Other	2.37699			0.00906504
k__Bacteria.p__Proteobacteria.c__Gammaproteobacteria.o__Alteromonadales.f__Marinobacteraceae.g__Marinobacter	1.54493			-
k__Bacteria.p__Firmicutes.c__Clostridia.o__Peptostreptococcales_Tissierellales.f__Peptostreptococcaceae.g__uncultured	1.20615			0.0366471
k__Bacteria.p__Myxococcota.c__Polyangia.o__VHS_B3_70.f__VHS_B3_70.g__VHS_B3_70	1.7413			-
k__Bacteria.p__Desulfobacterota.c__Desulfuromonadia.o__PB19.f__PB19	1.96453			-
k__Bacteria.p__Chloroflexi.c__Anaerolineae.o__Ardenticatenales.Other.Other	1.56816			-
k__Bacteria.p__Proteobacteria.c__Alphaproteobacteria.o__Rhizobiales.f__Beijerinckiaceae	3.30638			1.71211e-06
k__Bacteria.p__Firmicutes.c__Clostridia.o__Clostridia.f__Gracilibacteraceae.g__Lutispora	0.295355			-
k__Bacteria.p__Gemmatimonadota.c__Gemmatimonadetes.o__Gemmatimonadales.f__Gemmatimonadaceae.Other	3.06296			1.90151e-05
k__Bacteria.p__Desulfobacterota.c__Desulfobacteria.o__Desulfobacterales.f__Desulfosarcinaceae	2.39156			0.0022593
k__Bacteria.p__Acidobacteriota.c__Subgroup_22.o__Subgroup_22	2.62808			0.00734574
k__Bacteria.p__Planctomycetota.c__Phycisphaerae.o__Phycisphaerales	2.29604			-
k__Bacteria.p__Proteobacteria.c__Alphaproteobacteria.o__Defluviicoccales.f__uncultured	1.93192			-
k__Bacteria.p__Patescibacteria.c__Saccharimonadia.o__Saccharimonadales.f__Saccharimonadales	2.53666			0.00027982
k__Bacteria.p__Firmicutes.c__Clostridia.o__Clostridia.f__Gracilibacteraceae	0.295355			-
k__Bacteria.p__Bacteroidota.c__Bacteroidia.o__Chitinophagales.Other	1.62877			-
k__Bacteria.p__NB1_j.c__NB1_j.o__NB1_j.f__NB1_j	2.21128			-
k__Bacteria.p__Bacteroidota.c__Bacteroidia.o__Bacteroidales.f__Marinilabiliaceae.g__Carboxylicivirga	1.95495			-
k__Bacteria.p__Nitrospirota	3.08133			3.34668e-05
k__Bacteria.p__Proteobacteria.c__Alphaproteobacteria.o__uncultured.f__uncultured	2.99955			2.09609e-06
k__Bacteria.p__Acidobacteriota.c__Thermoanaerobaculia.o__Thermoanaerobaculales.f__Thermoanaerobaculaceae.g__Subgroup_10	2.83123			5.23796e-05
k__Bacteria.p__Bacteroidota.c__Bacteroidia.o__Sphingobacteriales.f__Sphingobacteriaceae.g__Anseongella	1.49267			-
k__Bacteria.p__Fusobacteriota.c__Fusobacteriia.o__Fusobacteriales.f__Fusobacteriaceae	3.75324			5.26833e-07
k__Bacteria.p__Proteobacteria.c__Gammaproteobacteria.o__Aeromonadales.f__Succinivibrionaceae.g__Ruminobacter	1.56116			-
k__Bacteria.p__Actinobacteriota.c__Thermoleophilia.o__Solirubrobacterales.f__Solirubrobacteraceae.Other	1.9999			-
k__Bacteria.p__Firmicutes.c__Bacilli.o__Lactobacillales.f__Carnobacteriaceae.g__Carnobacterium	0.316607			-
k__Bacteria.p__Acidobacteriota.c__Thermoanaerobaculia.o__Thermoanaerobaculales.f__Thermoanaerobaculaceae	2.83926			4.07173e-06
k__Bacteria.p__Bacteroidota.c__Bacteroidia.o__Bacteroidales.f__Barnesiellaceae.g__uncultured	1.6249			7.21257e-09
k__Bacteria.p__Proteobacteria.c__Gammaproteobacteria.o__KF_JG30_C25.f__KF_JG30_C25	2.02321			0.0498833
k__Bacteria.p__Desulfobacterota.c__Desulfobulbia.o__Desulfobulbales.f__Desulfocapsaceae.g__SEEP_SRB4	1.67462			-
k__Bacteria.p__Proteobacteria.c__Alphaproteobacteria.o__Rhodobacterales.f__Rhodobacteraceae.g__Rhodobacter	2.5243			0.000472205
k__Bacteria.p__Chloroflexi.c__Ktedonobacteria.o__Ktedonobacterales.f__JG30_KF_AS9	2.92582			5.1719e-05
k__Bacteria.p__Actinobacteriota.c__Coriobacteriia.o__Coriobacteriales.f__Eggerthellaceae.g__Cryptobacterium	0.600783			-
k__Bacteria.p__Proteobacteria.c__Alphaproteobacteria.o__Rhizobiales.f__Beijerinckiaceae.g__Bosea	2.28145			0.042898
k__Bacteria.p__Proteobacteria.c__Gammaproteobacteria.o__Burkholderiales.f__Comamonadaceae.g__Hydrogenophaga	2.37035			-
k__Bacteria.p__Firmicutes.c__Clostridia.o__Eubacteriales.f__Eubacteriaceae	1.69439			-
k__Bacteria.p__Nitrospirota.c__Nitrospiria	3.04966			2.94843e-05
k__Bacteria.p__Actinobacteriota.c__Actinobacteria.o__Bifidobacteriales.f__Bifidobacteriaceae	3.8063			6.72982e-07
k__Bacteria.p__Actinobacteriota.c__Actinobacteria.o__Streptosporangiales.f__Thermomonosporaceae.g__Actinocorallia	1.63228			0.0368029
k__Bacteria.p__Actinobacteriota.c__Coriobacteriia.o__Coriobacteriales.f__Eggerthellaceae.g__Paraeggerthella	1.78483			-
k__Bacteria.p__Bacteroidota.c__Bacteroidia.o__Cytophagales.f__Spirosomaceae	2.12859			-
k__Bacteria.p__Actinobacteriota.c__Actinobacteria.o__PeM15.f__PeM15	2.01728			-
k__Bacteria.p__Fibrobacterota.c__Fibrobacteria.o__Fibrobacterales.f__Fibrobacteraceae	2.5847			0.0344907
k__Bacteria.p__Actinobacteriota.c__Coriobacteriia.o__Coriobacteriales.f__Eggerthellaceae.g__Adlercreutzia	2.17964			-
k__Bacteria.p__Firmicutes.c__Clostridia.o__Peptostreptococcales_Tissierellales.f__Dethiosulfatibacteraceae	0.312892			-
k__Bacteria.p__Proteobacteria.c__Alphaproteobacteria.o__Zavarziniales.f__uncultured	1.56312			-
k__Bacteria.p__Actinobacteriota.c__Acidimicrobiia.Other.Other.Other	3.43686			1.70743e-06
k__Bacteria.p__Proteobacteria.c__Alphaproteobacteria.o__Rhizobiales.f__Rhizobiaceae.g__Aminobacter	1.80794			-
k__Bacteria.p__Gemmatimonadota.c__Gemmatimonadetes.o__Gemmatimonadales	3.92292			9.00361e-07
k__Bacteria.p__Firmicutes.c__Clostridia.o__Clostridiales.f__Clostridiaceae	3.95453			1.78225e-06
k__Bacteria.p__Proteobacteria.c__Gammaproteobacteria.o__Xanthomonadales.Other	1.61969			-
k__Bacteria.p__Spirochaetota.c__Spirochaetia.o__Spirochaetales.f__Spirochaetaceae.g__Spirochaeta	1.58794			-
k__Bacteria.p__Elusimicrobiota	2.558			0.0422158
k__Bacteria.p__Acidobacteriota.c__Acidobacteriae.o__Acidobacteriae	1.8165			-
k__Bacteria.p__Actinobacteriota.c__Acidimicrobiia.o__Microtrichales.Other	2.34815			0.00420679
k__Bacteria.p__Acidobacteriota.c__Subgroup_25.o__Subgroup_25.f__Subgroup_25	2.31613			-
k__Bacteria.p__Firmicutes.c__Bacilli.o__Staphylococcales.f__Staphylococcaceae.g__Staphylococcus	3.93899			7.74244e-08
k__Bacteria.p__Bacteroidota.c__Bacteroidia.o__Bacteroidales.f__PeH15.g__PeH15	0.344531			-
k__Bacteria.p__Firmicutes.c__Negativicutes.o__Veillonellales_Selenomonadales.f__Selenomonadaceae.g__Mitsuokella	1.92501			-
k__Bacteria.p__Proteobacteria.c__Gammaproteobacteria.o__R7C24	2.44832			-
k__Bacteria.p__Firmicutes.c__Clostridia.o__Oscillospirales.Other	2.83129			1.57523e-05
k__Bacteria.p__Elusimicrobiota.c__Lineage_IIc.o__Lineage_IIc.f__Lineage_IIc.g__Lineage_IIc	1.69439			-
k__Bacteria.p__Actinobacteriota.c__Actinobacteria.o__Nitriliruptorales.f__Nitriliruptoraceae.g__Nitriliruptoraceae	2.40294			-
k__Bacteria.p__Proteobacteria.c__Gammaproteobacteria.o__Alteromonadales.f__Pseudoalteromonadaceae	2.6914			0.000129175
k__Bacteria.p__Proteobacteria.c__Gammaproteobacteria.o__Cellvibrionales.f__Halieaceae.g__OM60_NOR5__clade	1.91245			-
k__Bacteria.p__Actinobacteriota.c__Actinobacteria.o__Corynebacteriales.f__Nocardiaceae.g__Rhodococcus	2.60783			3.6555e-07
k__Bacteria.p__Bacteroidota.c__Bacteroidia.o__Flavobacteriales.f__Flavobacteriaceae.g__uncultured	1.60106			-
k__Bacteria.p__Bacteroidota.c__Bacteroidia.o__Bacteroidales.f__Marinifilaceae.Other	2.58846			6.68196e-06
k__Bacteria.p__Desulfobacterota.c__Desulfuromonadia.o__Desulfuromonadia.f__Geothermobacteraceae.g__Geothermobacter	1.38671			-
k__Bacteria.p__Spirochaetota.c__Spirochaetia.o__Spirochaetales.f__Spirochaetaceae.g__Treponema	2.74146			0.000145361
k__Bacteria.p__LCP_89.c__LCP_89.o__LCP_89.f__LCP_89	1.31289			-
k__Bacteria.p__Desulfobacterota.c__Desulfobacteria.o__Desulfobacterales.f__Desulfosarcinaceae.g__Sva0081_sediment_group	1.48615			-
k__Bacteria.p__Bacteroidota.c__Bacteroidia.o__Bacteroidales.f__Prevotellaceae.g__uncultured	2.21224			-
k__Bacteria.p__Acidobacteriota.c__Subgroup_11	2.5811			0.000167467
k__Bacteria.p__Firmicutes.c__Clostridia.o__Lachnospirales.f__Lachnospiraceae.g__Frisingicoccus	2.2995			-
k__Bacteria.p__Proteobacteria.c__Gammaproteobacteria.o__Burkholderiales.f__Neisseriaceae.Other	1.95566			-
k__Bacteria.p__Proteobacteria.c__Alphaproteobacteria.o__Rhodobacterales.f__Rhodobacteraceae.g__Marivita	2.09096			0.0498833
k__Bacteria.p__Firmicutes.c__Bacilli.o__Lactobacillales.f__Carnobacteriaceae.g__Granulicatella	2.93369			0.00113221
k__Bacteria.p__Firmicutes.c__Clostridia.o__Lachnospirales.f__Lachnospiraceae.g__Hungatella	2.73134			-
k__Bacteria.p__Myxococcota.c__Polyangia.o__Polyangiales.f__Phaselicystidaceae	1.7749			-
k__Bacteria.p__Proteobacteria.c__Alphaproteobacteria.o__Azospirillales	2.76314			0.000993609
k__Bacteria.p__Proteobacteria.c__Alphaproteobacteria.o__Sphingomonadales.f__Sphingomonadaceae.g__Sandarakinorhabdus	1.8689			-
k__Bacteria.p__Firmicutes.c__Clostridia.o__Lachnospirales.f__Lachnospiraceae.g__Eisenbergiella	1.77073			-
k__Bacteria.p__Actinobacteriota.c__Actinobacteria.o__Streptosporangiales	2.31718			0.0381446
k__Bacteria.p__Proteobacteria.c__Gammaproteobacteria.o__Burkholderiales.f__Nitrosomonadaceae	3.53824			1.45436e-06
k__Bacteria.p__Proteobacteria.c__Gammaproteobacteria.o__Pseudomonadales.f__Moraxellaceae.g__Cavicella	1.53322			-
k__Bacteria.p__Firmicutes.c__Clostridia.o__Lachnospirales.f__Lachnospiraceae.g___Ruminococcus__gnavus_group	3.05503			7.65165e-06
k__Bacteria.p__Actinobacteriota.c__Actinobacteria.o__Streptosporangiales.f__Streptosporangiaceae	2.12592			-
k__Bacteria.p__Proteobacteria.c__Gammaproteobacteria.o__Burkholderiales.f__Nitrosomonadaceae.Other	1.99712			0.00496237
k__Bacteria.p__Proteobacteria.c__Gammaproteobacteria.o__Xanthomonadales.f__Rhodanobacteraceae.g__Luteibacter	1.25936			-
k__Bacteria.p__Proteobacteria.c__Alphaproteobacteria.o__Rhodospirillales.f__Magnetospirillaceae.Other	1.88404			-
k__Bacteria.p__Verrucomicrobiota.c__Verrucomicrobiae.o__Pedosphaerales	2.37539			0.000115888
k__Bacteria.p__Proteobacteria.c__Gammaproteobacteria.o__Oceanospirillales.f__Pseudohongiellaceae	2.62956			0.00428627
k__Bacteria.p__Actinobacteriota.c__Acidimicrobiia.o__Microtrichales.f__Microtrichaceae.g__uncultured	1.64014			-
k__Bacteria.p__Proteobacteria.c__Alphaproteobacteria.o__Micropepsales.f__Micropepsaceae.g__Micropepsis	1.91771			-
k__Bacteria.p__Firmicutes.c__Clostridia.Other.Other	3.66726			4.76249e-06
k__Bacteria.p__Gemmatimonadota	4.03593			5.2338e-07
k__Bacteria.p__Campilobacterota.c__Campylobacteria.o__Campylobacterales.f__Campylobacteraceae.g__Campylobacter	2.69709			4.79151e-05
k__Bacteria.p__Proteobacteria.c__Gammaproteobacteria.o__Aeromonadales.f__Aeromonadaceae.g__Oceanisphaera	1.55357			-
k__Bacteria.p__Actinobacteriota.c__Actinobacteria.o__Streptosporangiales.f__Thermomonosporaceae.g__Actinomadura	1.75448			-
k__Bacteria.p__Firmicutes.c__Clostridia.o__Lachnospirales.f__Lachnospiraceae.g__Lachnospira	3.34454			1.21683e-06
k__Bacteria.p__Proteobacteria.c__Gammaproteobacteria.o__Enterobacterales.Other.Other	1.43706			-
k__Bacteria.p__Proteobacteria.c__Gammaproteobacteria.o__Burkholderiales.f__Burkholderiaceae.g__Ralstonia	3.7733			1.06506e-06
k__Bacteria.p__Proteobacteria.c__Gammaproteobacteria.o__PLTA13.f__PLTA13	2.88254			8.29747e-05
k__Bacteria.p__Actinobacteriota.c__Actinobacteria.o__Propionibacteriales.f__Nocardioidaceae.g__Nocardioides	2.88649			1.00889e-06
k__Bacteria.p__Patescibacteria.c__Saccharimonadia.o__Saccharimonadales.f__S32.g__TM7	2.23918			-
k__Bacteria.p__Firmicutes.c__Clostridia.o__Peptostreptococcales_Tissierellales.f__Anaerovoracaceae.g__uncultured	1.7413			-
k__Bacteria.p__Fusobacteriota	3.80599			3.24797e-07
k__Bacteria.p__Proteobacteria.c__Gammaproteobacteria.o__CCD24.f__CCD24	2.67712			0.00119247
k__Bacteria.p__Firmicutes.c__Bacilli.o__Alicyclobacillales.f__Alicyclobacillaceae.g__Effusibacillus	1.64534			-
k__Bacteria.p__Desulfobacterota.c__Syntrophorhabdia.o__Syntrophorhabdales.f__Syntrophorhabdaceae	0.61704			-
k__Bacteria.p__Bacteroidota.c__Bacteroidia.o__Bacteroidales.f__Bacteroidetes_vadinHA17.g__Bacteroidetes_vadinHA17	1.37406			-
k__Bacteria.p__Bdellovibrionota.c__Oligoflexia.o__Oligoflexales	1.1688			-
k__Bacteria.p__Proteobacteria.c__Alphaproteobacteria.o__Acetobacterales.f__Acetobacteraceae.g__Acidisoma	1.59183			-
k__Bacteria.p__Bacteroidota.c__Bacteroidia.o__Chitinophagales.f__uncultured	2.18781			-
k__Bacteria.p__Proteobacteria.c__Gammaproteobacteria.o__Oceanospirillales.f__Pseudohongiellaceae.g__Pseudohongiella	2.61157			0.000500847
k__Bacteria.p__Desulfobacterota.c__Desulfovibrionia	4.52393	S-C	4.22522	5.1837e-08
k__Bacteria.p__Elusimicrobiota.c__Elusimicrobia.o__MVP_88	1.94221			-
k__Bacteria.p__Desulfobacterota.c__Desulfobulbia.o__Desulfobulbales.f__Desulfobulbaceae.g__Desulfobulbus	1.49946			-
k__Bacteria.p__Bacteroidota.c__Bacteroidia.o__Bacteroidales.f__Bacteroidetes_BD2_2	1.96405			0.00337288
k__Bacteria.p__Proteobacteria.c__Alphaproteobacteria.o__Rhodobacterales.f__Rhodobacteraceae.g__Roseovarius	1.93594			0.000706789
k__Bacteria.p__Bdellovibrionota.c__Bdellovibrionia.o__Bacteriovoracales	2.13643			-
k__Bacteria.p__Bacteroidota.c__Ignavibacteria.o__Ignavibacteriales.f__PHOS_HE36	1.67246			0.00792646
k__Bacteria.p__MBNT15.c__MBNT15	2.32039			0.0466515
k__Bacteria.p__Bacteroidota.c__Bacteroidia.o__Bacteroidales.Other.Other	4.27277			2.84838e-08
k__Bacteria.p__Marinimicrobia__SAR406_clade_	1.47533			-
k__Bacteria.p__Proteobacteria.c__Gammaproteobacteria.o__Alteromonadales.f__Idiomarinaceae.g__Idiomarina	1.27794			-
k__Bacteria.p__Myxococcota.c__Polyangia.o__Polyangiales.f__Sandaracinaceae.g__Sandaracinus	2.18498			0.0360593
k__Bacteria.p__Desulfobacterota.c__Desulfobacteria.o__Desulfobacterales.f__Desulfobacteraceae	1.92298			0.0058387
k__Bacteria.p__Firmicutes.c__Clostridia.o__Oscillospirales.f__Ruminococcaceae.g__UBA1819	4.99141	L-NR	4.69965	5.13397e-06
k__Bacteria.p__Chloroflexi.c__Ktedonobacteria.o__Ktedonobacterales.f__Ktedonobacteraceae.g__FCPS473	1.88728			-
k__Bacteria.p__Proteobacteria.c__Gammaproteobacteria.o__Burkholderiales.f__Nitrosomonadaceae.g__Nitrosospira	1.93308			0.0158389
k__Bacteria.p__Proteobacteria.c__Gammaproteobacteria.o__Burkholderiales.f__Alcaligenaceae.g__Candidimonas	1.41016			0.0451259
k__Bacteria.p__Firmicutes.c__Negativicutes	3.41266			2.69241e-06
k__Bacteria.p__Proteobacteria.c__Alphaproteobacteria.o__Micavibrionales.Other.Other	1.62735			-
k__Bacteria.p__Proteobacteria.c__Alphaproteobacteria.o__Azospirillales.f__Azospirillaceae.g__uncultured	2.0897			-
k__Bacteria.p__Proteobacteria.c__Alphaproteobacteria.o__Puniceispirillales.f__Puniceispirillales_Incertae_Sedis	2.09349			0.0190232
k__Bacteria.p__Actinobacteriota.c__Actinobacteria.o__Corynebacteriales.f__Corynebacteriaceae.g__Lawsonella	1.78872			-
k__Bacteria.p__Proteobacteria.c__Alphaproteobacteria.o__Caulobacterales.f__Parvularculaceae	1.66134			-
k__Bacteria.p__Proteobacteria.c__Alphaproteobacteria.o__SAR11_clade.f__Clade_III.g__Clade_III	2.78262			7.66941e-05
k__Bacteria.p__Bacteroidota.c__Bacteroidia.o__Flavobacteriales.f__Weeksellaceae	2.58862			0.000370576
k__Bacteria.p__Firmicutes.c__Clostridia.o__Clostridia_UCG_014.f__Clostridia_UCG_014.g__Clostridia_UCG_014	4.42374	L-C	4.11229	2.86578e-07
k__Bacteria.p__Gemmatimonadota.c__S0134_terrestrial_group.o__S0134_terrestrial_group.f__S0134_terrestrial_group	2.85744			7.83181e-05
k__Bacteria.p__Firmicutes.c__Bacilli.o__Paenibacillales.f__Paenibacillaceae.g__Cohnella	1.41185			-
k__Bacteria.p__Fibrobacterota.c__Fibrobacteria.o__Fibrobacterales	2.5847			0.0344907
k__Bacteria.p__Firmicutes.c__Clostridia.o__Oscillospirales.f__Ethanoligenenaceae	1.16402			-
k__Bacteria.p__Elusimicrobiota.c__Lineage_IIb.o__Lineage_IIb.f__Lineage_IIb.g__Lineage_IIb	1.91495			-
k__Bacteria.p__Firmicutes.c__Clostridia.o__Lachnospirales.f__Lachnospiraceae.g__Lachnospiraceae_ND3007_group	2.4843			0.0248038
k__Bacteria.p__Proteobacteria.c__Alphaproteobacteria.o__Micropepsales	3.32064			3.1481e-06
k__Bacteria.p__Firmicutes.c__Clostridia.o__Lachnospirales.f__Lachnospiraceae.g__GCA_900066575	3.75654			3.47845e-05
k__Bacteria.p__Firmicutes.c__Clostridia.o__Oscillospirales.f__Ruminococcaceae.g__Ruminococcus	3.64035			4.41415e-07
k__Bacteria.p__Campilobacterota.c__Campylobacteria.o__Campylobacterales.f__Helicobacteraceae.g__Helicobacter	3.32155			9.7496e-06
k__Bacteria.p__Bacteroidota.c__Bacteroidia.o__Chitinophagales.f__Chitinophagaceae.g__Flaviaesturariibacter	1.49797			-
k__Bacteria.p__Marinimicrobia__SAR406_clade_.c__Marinimicrobia__SAR406_clade_.o__Marinimicrobia__SAR406_clade_.f__Marinimicrobia__SAR406_clade_	1.47533			-
k__Bacteria.p__Actinobacteriota.c__Actinobacteria.o__Catenulisporales	2.5348			0.0256398
k__Bacteria.p__Elusimicrobiota.c__Lineage_IIb.o__Lineage_IIb.f__Lineage_IIb	1.91495			-
k__Bacteria.p__Proteobacteria.c__Gammaproteobacteria.o__Ectothiorhodospirales.f__Ectothiorhodospiraceae	1.98573			-
k__Bacteria.p__Elusimicrobiota.c__Lineage_IIb.o__Lineage_IIb	1.91495			-
k__Bacteria.p__Proteobacteria.c__Gammaproteobacteria.o__Burkholderiales.f__Hydrogenophilaceae.g__Thiobacillus	1.81227			-
k__Bacteria.p__Firmicutes.c__Bacilli.o__Erysipelotrichales	5.05994	L-NOB	4.71973	1.46548e-06
k__Bacteria.p__Proteobacteria.c__Gammaproteobacteria.o__Gammaproteobacteria_Incertae_Sedis.f__Unknown_Family.g__Unknown_Family	1.73389			-
k__Bacteria.p__Patescibacteria.c__Saccharimonadia.o__Saccharimonadales.f__Saccharimonadales.g__Saccharimonadales	2.53666			0.00027982
k__Bacteria.p__Proteobacteria.c__Alphaproteobacteria.o__Caulobacterales.f__Caulobacteraceae.g__Phenylobacterium	2.54035			0.00368334
k__Bacteria.p__Proteobacteria.c__Gammaproteobacteria.o__Chromatiales.f__Sedimenticolaceae.g__Sedimenticola	1.56143			-
k__Bacteria.p__Proteobacteria.c__Alphaproteobacteria.o__Rhizobiales.f__Rhizobiaceae.g__Ochrobactrum	2.38056			0.000749577
k__Bacteria.p__Actinobacteriota.c__Thermoleophilia	3.86108			8.67126e-07
k__Bacteria.p__Actinobacteriota.c__Actinobacteria.o__Corynebacteriales.f__Corynebacteriaceae	3.39237			4.79573e-07
k__Bacteria.p__Proteobacteria.c__Gammaproteobacteria.o__Burkholderiales.f__Oxalobacteraceae.g__Noviherbaspirillum	2.40849			0.0138493
k__Bacteria.p__Proteobacteria.c__Gammaproteobacteria.o__Burkholderiales.f__Comamonadaceae.g__Rhizobacter	2.22347			0.0207696
k__Bacteria.p__Proteobacteria.c__Alphaproteobacteria.o__Rhizobiales.f__Rhizobiales_Incertae_Sedis.g__uncultured	2.29647			-
k__Bacteria.p__Firmicutes.c__Clostridia.o__Oscillospirales.f__UCG_010	3.28383			1.35793e-06
k__Bacteria.p__Actinobacteriota.c__Thermoleophilia.o__Gaiellales.f__uncultured	3.50927			1.90207e-06
k__Bacteria.p__Bacteroidota.c__Bacteroidia.o__Bacteroidales.f__Paludibacteraceae.g__uncultured	1.54703			-
k__Bacteria.p__Desulfobacterota.c__Desulfuromonadia.o__Geobacterales.f__Geobacteraceae.g__uncultured	1.97263			-
k__Bacteria.p__Actinobacteriota.c__Actinobacteria.o__Frankiales.f__Sporichthyaceae.g__Longivirga	1.13953			-
k__Bacteria.p__Firmicutes.c__Clostridia.o__Lachnospirales.f__Lachnospiraceae.g__Lachnospiraceae_AC2044_group	1.55448			1.87477e-07
k__Bacteria.p__Actinobacteriota.c__Coriobacteriia.o__Coriobacteriales.f__Eggerthellaceae.g__Parvibacter	2.30685			-
k__Bacteria.p__Proteobacteria.c__Alphaproteobacteria.o__Rhizobiales.f__Pleomorphomonadaceae.g__Pleomorphomonas	1.33098			-
k__Bacteria.p__Firmicutes.c__Clostridia.o__Lachnospirales	5.71179	L-NOB	5.322	8.87377e-08
k__Bacteria.p__Firmicutes.c__Bacilli.o__Erysipelotrichales.f__Erysipelatoclostridiaceae.g__UCG_004	1.74905			-
k__Bacteria.p__Firmicutes.c__Bacilli.o__Erysipelotrichales.f__Erysipelotrichaceae	4.98525	L-NOB	4.6424	2.13433e-06
k__Bacteria.p__Firmicutes.c__Clostridia.o__Oscillospirales.f__Oscillospiraceae.g__Oscillibacter	4.16491			5.86914e-06
k__Bacteria.p__Proteobacteria.c__Alphaproteobacteria.o__Rhizobiales.f__Rhizobiaceae	3.204			9.90073e-08
k__Bacteria.p__Bacteroidota.c__Bacteroidia.o__Bacteroidales.f__Prolixibacteraceae.g__BSV13	1.46479			-
k__Bacteria.p__Bacteroidota.c__Kryptonia.o__Kryptoniales.f__BSV26.g__BSV26	2.21726			0.0201033
k__Bacteria.p__Actinobacteriota.c__Actinobacteria.Other.Other.Other	2.43101			0.004618
k__Bacteria.p__Proteobacteria.c__Gammaproteobacteria.o__Burkholderiales.f__Neisseriaceae	4.11482			5.58743e-07
k__Bacteria.p__Firmicutes.c__Bacilli.o__Erysipelotrichales.f__Erysipelotrichaceae.g__Faecalitalea	2.86097			6.67884e-05
k__Bacteria.p__Actinobacteriota.c__Acidimicrobiia.o__uncultured	2.87888			0.00162011
k__Bacteria.p__Actinobacteriota.c__Actinobacteria.o__Euzebyales.f__Euzebyaceae	2.57665			0.0315332
k__Bacteria.p__Proteobacteria.c__Gammaproteobacteria.o__Burkholderiales.f__Sutterellaceae	3.83268			2.4203e-06
k__Bacteria.p__Bacteroidota.c__SJA_28.o__SJA_28	1.6337			-
k__Bacteria.p__Chloroflexi.c__Dehalococcoidia.o__Dehalococcoidales.f__Dehalococcoidaceae	1.47387			-
k__Bacteria.p__Proteobacteria.c__Gammaproteobacteria.o__Pseudomonadales.f__Pseudomonadaceae.Other	1.62473			-
k__Bacteria.p__Proteobacteria.c__Alphaproteobacteria.o__Caulobacterales.f__Caulobacteraceae.g__Caulobacteraceae	0.623598			-
k__Bacteria.p__Actinobacteriota.c__Actinobacteria.o__Catenulisporales.f__Actinospicaceae.g__Actinospica	2.29783			0.0454725
k__Bacteria.p__Proteobacteria.c__Alphaproteobacteria.o__Reyranellales.f__Reyranellaceae.g__uncultured	2.13677			-
k__Bacteria.p__Verrucomicrobiota.c__Chlamydiae.o__Chlamydiales.f__Parachlamydiaceae	2.28583			-
k__Bacteria.p__Firmicutes.c__Clostridia.o__Clostridiales	3.95453			1.78225e-06
k__Bacteria.p__Desulfobacterota.c__Desulfuromonadia.o__MA_28_I98C.f__MA_28_I98C	1.81433			-
k__Bacteria.p__Myxococcota.c__Polyangia	3.44027			3.33793e-06
k__Bacteria.p__Actinobacteriota.c__Actinobacteria.o__Micrococcales.f__Cellulomonadaceae.Other	1.87066			-
k__Bacteria.p__Proteobacteria.c__Alphaproteobacteria.o__Rhodobacterales.f__Rhodobacteraceae.g__Pseudorhodobacter	1.80004			-
k__Bacteria.p__Firmicutes.c__Bacilli.o__Erysipelotrichales.f__Erysipelotrichaceae.g__Dubosiella	3.98618			1.16543e-05
k__Bacteria.p__Myxococcota.c__Polyangia.o__Polyangiales.f__Phaselicystidaceae.g__Phaselicystis	1.7749			-
k__Bacteria.p__Bacteroidota	5.75009	L-C	5.4446	3.71051e-08
k__Bacteria.p__Proteobacteria.c__Gammaproteobacteria.o__Burkholderiales.f__Oxalobacteraceae.g__Massilia	2.96259			1.03791e-06
k__Bacteria.p__Bacteroidota.c__Bacteroidia.o__Bacteroidales.f__Rikenellaceae.g__Rikenella	2.45129			-
k__Bacteria.p__Firmicutes.c__Bacilli.o__RF39.f__RF39	2.01199			0.0203729
k__Bacteria.p__Firmicutes.c__Clostridia.o__Lachnospirales.f__Lachnospiraceae.g__Oribacterium	2.00983			-
k__Bacteria.p__WPS_2.c__WPS_2.o__WPS_2	2.59259			-
k__Bacteria.p__Proteobacteria.c__Gammaproteobacteria.o__Pasteurellales.f__Pasteurellaceae.g__Aggregatibacter	3.43287			1.37163e-06
k__Bacteria.p__Actinobacteriota.c__Actinobacteria.o__Micrococcales.f__Promicromonosporaceae.g__Isoptericola	1.69887			-
k__Bacteria.p__Desulfobacterota.c__Desulfuromonadia.Other.Other	0.596385			-
k__Bacteria.p__Acidobacteriota.c__Acidobacteriae.o__Subgroup_12	1.27334			-
k__Bacteria.p__Acidobacteriota.c__Acidobacteriae.o__Subgroup_13	1.56816			-
k__Bacteria.p__Acidobacteriota.c__Acidobacteriae.o__Subgroup_15	1.63511			-
k__Bacteria.p__Bacteroidota.c__Bacteroidia.o__Flavobacteriales.Other.Other	1.9892			-
k__Bacteria.p__Firmicutes.c__Bacilli.Other	0.624732			-
k__Bacteria.p__Proteobacteria.c__Gammaproteobacteria.o__Gammaproteobacteria_Incertae_Sedis.f__Unknown_Family.g__Sulfuriflexus	1.28419			-
k__Bacteria.p__Actinobacteriota.c__Acidimicrobiia.o__Microtrichales.f__uncultured	2.80261			0.00092227
k__Bacteria.p__Proteobacteria.c__Alphaproteobacteria.o__Reyranellales.f__Reyranellaceae	2.93661			1.26833e-05
k__Bacteria.p__Nitrospirota.c__Thermodesulfovibrionia	1.82974			-
k__Bacteria.p__Actinobacteriota.c__Coriobacteriia.o__OPB41.f__OPB41.g__OPB41	0.755443			-
k__Bacteria.p__Firmicutes.c__Clostridia.o__Peptostreptococcales_Tissierellales.f__Peptostreptococcaceae.g__Filifactor	1.36138			-
k__Bacteria.p__Acidobacteriota.c__Acidobacteriae.o__PAUC26f.f__PAUC26f.g__PAUC26f	3.31456			2.53594e-06
k__Bacteria.p__Proteobacteria.c__Gammaproteobacteria.o__Enterobacterales.f__Enterobacteriaceae.g__Klebsiella	3.46868			6.3804e-08
k__Bacteria.p__Proteobacteria.c__Gammaproteobacteria.o__Enterobacterales.f__Enterobacteriaceae	4.97344	S-Anti	4.66275	4.80377e-08
k__Bacteria.p__Verrucomicrobiota.c__Omnitrophia.o__Omnitrophales.f__Omnitrophales.g__Omnitrophales	1.49267			-
k__Bacteria.p__Desulfobacterota.c__Desulfovibrionia.o__Desulfovibrionales.f__Desulfovibrionaceae.Other	2.93616			6.50429e-08
k__Bacteria.p__Actinobacteriota.c__Actinobacteria.o__Kineosporiales.f__Kineosporiaceae.g__Quadrisphaera	1.91418			-
k__Bacteria.p__Acidobacteriota.c__Acidobacteriae.o__Subgroup_12.f__Subgroup_12.g__Subgroup_12	1.27334			-
k__Bacteria.p__Patescibacteria.c__Gracilibacteria.o__Gracilibacteria	1.20648			-
k__Bacteria.p__Proteobacteria.c__Alphaproteobacteria.o__Caulobacterales.Other.Other	2.02175			-
k__Bacteria.p__Firmicutes.c__Bacilli.o__Acholeplasmatales.f__Acholeplasmataceae.g__Anaeroplasma	2.37922			0.00464068
k__Bacteria.p__Bacteroidota.c__Bacteroidia.o__Bacteroidales.f__Paludibacteraceae.g__F0058	1.71083			-
k__Bacteria.p__Firmicutes.c__Clostridia.o__Lachnospirales.f__Lachnospiraceae.g__GCA_900066755	1.89077			-
k__Bacteria.p__Proteobacteria.c__Gammaproteobacteria.o__Oceanospirillales	2.71665			0.00261387
k__Bacteria.p__Proteobacteria.c__Gammaproteobacteria.o__Nitrosococcales.f__Nitrosococcaceae.Other	2.18696			0.0380901
k__Bacteria.p__Dependentiae.c__Babeliae.o__Babeliales.f__Babeliales.g__Babeliales	2.04211			-
k__Bacteria.p__Actinobacteriota.c__Thermoleophilia.o__Solirubrobacterales.f__67_14	3.21337			2.67248e-06
k__Bacteria.p__Planctomycetota.c__Phycisphaerae.o__Phycisphaerales.f__Phycisphaeraceae	2.29604			-
k__Bacteria.p__Proteobacteria.c__Gammaproteobacteria.o__Burkholderiales.f__Rhodocyclaceae.g__Uliginosibacterium	1.31866			-
k__Bacteria.p__Patescibacteria.c__Saccharimonadia	2.75524			0.000128352
k__Bacteria.p__Proteobacteria.c__Alphaproteobacteria.o__Sphingomonadales.f__Sphingomonadaceae.g__Sphingomonas	4.21934			4.59199e-07
k__Bacteria.p__Bacteroidota.c__Bacteroidia.o__SM1A07	1.40664			-
k__Bacteria.p__Fusobacteriota.c__Fusobacteriia.o__Fusobacteriales.f__Leptotrichiaceae.g__Leptotrichia	3.04367			3.6597e-07
k__Bacteria.p__Firmicutes.c__Clostridia.o__Oscillospirales.Other.Other	2.83129			1.57523e-05
k__Bacteria.p__Actinobacteriota.c__Actinobacteria.o__Corynebacteriales.f__Corynebacteriaceae.g__Corynebacterium	3.392			4.3333e-07
k__Bacteria.p__Actinobacteriota.c__Actinobacteria.o__Micrococcales.f__Microbacteriaceae.g__Galbitalea	2.19747			0.028715
k__Bacteria.p__Proteobacteria.c__Alphaproteobacteria.o__Rhizobiales.f__Hyphomicrobiaceae.g__Hyphomicrobium	2.5429			0.0059687
k__Bacteria.p__Calditrichota.c__Calditrichia	1.22201			-
k__Bacteria.p__Firmicutes.c__Bacilli.o__Bacillales.f__Planococcaceae	2.13573			0.00910971
k__Bacteria.p__Proteobacteria.c__Gammaproteobacteria.o__Aeromonadales.f__Succinivibrionaceae.g__uncultured	1.5207			-
k__Bacteria.p__Proteobacteria.c__Gammaproteobacteria.o__Burkholderiales.f__Methylophilaceae.Other	1.9104			-
k__Bacteria.p__Elusimicrobiota.c__Endomicrobia.o__Endomicrobiales	1.73155			-
k__Bacteria.p__Firmicutes.c__Clostridia.o__Lachnospirales.f__Lachnospiraceae.g___Ruminococcus__torques_group	4.28113			2.28296e-05
k__Bacteria.p__Firmicutes.c__Bacilli.o__Exiguobacterales.f__Exiguobacteraceae.g__Exiguobacterium	1.82972			-
k__Bacteria.p__Actinobacteriota.c__Actinobacteria.o__Pseudonocardiales.f__Pseudonocardiaceae.Other	1.85083			-
k__Bacteria.p__Desulfobacterota.c__Desulfobulbia.o__Desulfobulbales.Other.Other	1.68805			-
k__Bacteria.p__Myxococcota.c__Polyangia.o__Blfdi19	2.19156			-
k__Bacteria.p__Bacteroidota.c__Bacteroidia.o__Flavobacteriales.f__Weeksellaceae.g__Bergeyella	2.06496			-
k__Bacteria.p__Bacteroidota.c__Bacteroidia.o__Cytophagales.f__Amoebophilaceae	1.44056			-
k__Bacteria.p__Proteobacteria.c__Alphaproteobacteria.o__Caulobacterales.f__Caulobacteraceae.g__Brevundimonas	2.44601			0.0179442
k__Bacteria.p__Marinimicrobia__SAR406_clade_.c__Marinimicrobia__SAR406_clade_.o__Marinimicrobia__SAR406_clade_	1.47533			-
k__Bacteria.p__Actinobacteriota.c__Actinobacteria.o__Pseudonocardiales.f__Pseudonocardiaceae.g__Kibdelosporangium	1.87505			-
k__Bacteria.p__Chloroflexi.c__Anaerolineae.o__SJA_15	1.83124			-
k__Bacteria.p__Gemmatimonadota.Other.Other.Other.Other	1.66108			-
k__Bacteria.p__Actinobacteriota.c__MB_A2_108.o__MB_A2_108.f__MB_A2_108.g__MB_A2_108	3.28427			3.52345e-06
k__Bacteria.p__Dependentiae.c__Babeliae.o__Babeliales.Other	2.56413			0.00780363
k__Bacteria.p__Firmicutes.c__Clostridia.o__Clostridiales.f__Clostridiaceae.g__Clostridium_sensu_stricto_1	3.94167			1.69569e-06
k__Bacteria.p__Myxococcota.c__Myxococcia.o__Myxococcales.f__27F_1492R	0.624015			-
k__Bacteria.p__Proteobacteria.c__Alphaproteobacteria.o__Azospirillales.f__Inquilinaceae.g__Inquilinus	1.60856			-
k__Bacteria.p__Proteobacteria.c__Gammaproteobacteria.o__Thiomicrospirales.f__Thioglobaceae.g__SUP05_cluster	1.66805			-
k__Bacteria.p__Fusobacteriota.c__Fusobacteriia.o__Fusobacteriales.f__Leptotrichiaceae	3.04367			3.6597e-07
k__Bacteria.p__Chloroflexi.c__TK10.o__TK10.f__TK10.g__TK10	1.40359			-
k__Bacteria.p__Calditrichota.c__Calditrichia.o__Calditrichales	1.22201			-
k__Bacteria.p__Proteobacteria.c__Alphaproteobacteria.o__Caulobacterales.f__Hyphomonadaceae.g__Hyphomonas	1.75393			-
k__Bacteria.p__Proteobacteria.c__Gammaproteobacteria.o__Salinisphaerales.f__Solimonadaceae.g__uncultured	1.15011			-
k__Bacteria.p__Dependentiae.c__Babeliae.o__Babeliales.f__Vermiphilaceae	1.92576			-
k__Bacteria.p__Actinobacteriota.c__Actinobacteria.o__0319_7L14.f__0319_7L14.g__0319_7L14	3.59282			6.51932e-07
k__Bacteria.p__Proteobacteria.c__Alphaproteobacteria.Other.Other.Other	2.81968			0.000176637
k__Bacteria.p__Actinobacteriota.c__Thermoleophilia.o__Gaiellales.f__Gaiellales.g__Gaiellales	1.88071			-
k__Bacteria.p__Chloroflexi.Other.Other	2.32676			0.00920644
k__Bacteria.p__Sva0485.c__Sva0485.o__Sva0485.f__Sva0485	1.64726			-
k__Bacteria.p__Acidobacteriota.c__Acidobacteriae.o__Acidobacteriales.f__Acidobacteriaceae__Subgroup_1_.g__Granulicella	2.47194			0.00225519
k__Bacteria.p__Acidobacteriota.c__Acidobacteriae.o__Subgroup_2.f__Subgroup_2	2.24225			-
k__Bacteria.p__Proteobacteria.c__Alphaproteobacteria.o__Elsterales.Other.Other	2.02367			0.00373826
k__Bacteria.p__Proteobacteria.c__Gammaproteobacteria.o__Immundisolibacterales	1.64479			-
k__Bacteria.p__MBNT15.c__MBNT15.o__MBNT15.f__MBNT15.g__MBNT15	2.32039			0.0466515
k__Bacteria.p__Firmicutes.c__Bacilli.o__Bacillales.f__Bacillaceae.g__Anoxybacillus	1.52782			-
k__Bacteria.p__WPS_2	2.59259			-
k__Bacteria.p__Firmicutes.c__Negativicutes.o__Veillonellales_Selenomonadales.f__Veillonellaceae	3.37587			3.10527e-06
k__Bacteria.p__Actinobacteriota.c__Actinobacteria.o__Catenulisporales.f__Catenulisporaceae	2.45258			-
k__Bacteria.p__Chloroflexi.c__TK10.o__TK10.f__TK10	1.40359			-
k__Bacteria.p__Patescibacteria.c__Gracilibacteria.Other.Other.Other	1.91363			-
k__Bacteria.p__Dependentiae.c__Babeliae.o__Babeliales	2.67828			0.00373945
k__Bacteria.p__Entotheonellaeota.c__Entotheonellia.o__Entotheonellales.f__Entotheonellaceae	2.07965			-
k__Bacteria.p__Proteobacteria.c__Gammaproteobacteria.o__Burkholderiales.f__Comamonadaceae.g__Caenimonas	1.57839			-
k__Bacteria.p__Cyanobacteria.c__Cyanobacteriia.Other.Other.Other	2.18276			0.000543406
k__Bacteria.p__Firmicutes.c__Bacilli.o__Lactobacillales.f__Enterococcaceae	4.02148			8.03543e-07
k__Bacteria.p__Firmicutes.c__D8A_2.o__D8A_2.f__D8A_2	1.83124			-
k__Bacteria.p__Myxococcota.c__bacteriap25.o__bacteriap25.f__bacteriap25.g__bacteriap25	2.58322			0.0012916
k__Bacteria.p__Chloroflexi.c__Ktedonobacteria.o__C0119	2.43052			-
k__Bacteria.p__Chloroflexi.c__Ktedonobacteria	3.10442			3.04866e-06
k__Bacteria.p__Proteobacteria.c__Gammaproteobacteria.o__Cellvibrionales.f__Halieaceae.Other	1.7591			-
k__Bacteria.p__Gemmatimonadota.c__Longimicrobia.o__Longimicrobiales.f__Longimicrobiaceae	3.16972			1.1988e-07
k__Bacteria.p__Proteobacteria.c__Gammaproteobacteria.o__Steroidobacterales.f__Woeseiaceae.g__Woeseia	2.92805			0.000100301
k__Bacteria.p__Firmicutes.c__Clostridia.o__Peptostreptococcales_Tissierellales.f__Peptostreptococcaceae	5.41859	L-NR	5.10002	8.55827e-08
k__Bacteria.p__Proteobacteria.c__Gammaproteobacteria.o__Enterobacterales.f__Yersiniaceae.g__Yersinia	2.01241			-
k__Bacteria.p__Firmicutes.Other.Other.Other.Other	2.27074			0.00568491
k__Bacteria.p__Proteobacteria.c__Gammaproteobacteria.o__Burkholderiales.f__Oxalobacteraceae.g__uncultured	1.36913			-
k__Bacteria.p__Elusimicrobiota.c__Elusimicrobia.o__Lineage_IV.f__Lineage_IV	1.95026			-
k__Bacteria.p__Proteobacteria.c__Gammaproteobacteria.Other.Other	2.86226			4.44079e-05
k__Bacteria.p__Firmicutes.c__Clostridia.o__Lachnospirales.f__Lachnospiraceae.Other	4.7559	L-NR	4.28655	5.40251e-05
k__Bacteria.p__Bacteroidota.c__Bacteroidia.o__Cytophagales.f__Microscillaceae.g__uncultured	3.17183			2.65397e-07
k__Bacteria.p__Proteobacteria.c__Alphaproteobacteria.o__Rhizobiales.f__Labraceae	1.74135			-
k__Bacteria.p__Proteobacteria.c__Gammaproteobacteria.o__Burkholderiales.f__Alcaligenaceae.g__Achromobacter	2.50601			0.000176544
k__Bacteria.p__Proteobacteria.c__Alphaproteobacteria.o__Acetobacterales.f__Acetobacteraceae	3.10638			2.02077e-06
k__Bacteria.p__Proteobacteria.c__Alphaproteobacteria.o__Ferrovibrionales.f__Ferrovibrionaceae.g__Ferrovibrio	2.57777			0.0275636
k__Bacteria.p__Proteobacteria.c__Gammaproteobacteria.o__Enterobacterales.f__Morganellaceae.g__Morganella	3.51979			3.22243e-06
k__Bacteria.p__Sva0485	1.64726			-
k__Bacteria.p__Firmicutes.c__Clostridia.o__Monoglobales	2.98676			2.66549e-05
k__Bacteria.p__Firmicutes.c__Bacilli.o__Bacillales.f__Planococcaceae.g__Sporosarcina	1.83628			-
k__Bacteria.p__Firmicutes.c__Bacilli.o__Lactobacillales.f__Streptococcaceae	4.99068	S-NOB	4.6794	9.30517e-08
k__Bacteria.p__Myxococcota.c__Myxococcia.o__Myxococcales.f__Anaeromyxobacteraceae	2.51043			0.00826365
k__Bacteria.p__Desulfobacterota.c__Desulfobacteria.o__Desulfobacterales.f__Desulfosarcinaceae.g__uncultured	2.11223			-
k__Bacteria.p__Acidobacteriota.c__Subgroup_11.o__Subgroup_11.f__Subgroup_11	2.5811			0.000167467
k__Bacteria.p__Actinobacteriota.c__Actinobacteria.o__Micromonosporales.f__Micromonosporaceae.g__Actinoplanes	2.3531			-
k__Bacteria.p__Bacteroidota.c__Bacteroidia.o__Flavobacteriales.f__Flavobacteriaceae.g__Myroides	2.28871			4.92374e-06
k__Bacteria.p__Firmicutes.c__Clostridia.o__Oscillospirales.f__Oscillospiraceae.g__Pseudoflavonifractor	0.319418			-
k__Bacteria.p__Proteobacteria.c__Alphaproteobacteria.o__Rhizobiales.f__Beijerinckiaceae.g__Methylorosula	3.09806			1.98975e-05
k__Bacteria.p__Gemmatimonadota.c__BD2_11_terrestrial_group.o__BD2_11_terrestrial_group.f__BD2_11_terrestrial_group	2.76812			0.000694757
k__Bacteria.p__Proteobacteria.c__Alphaproteobacteria.o__Rhizobiales.f__Rhizobiales_Incertae_Sedis.g__Anderseniella	1.75002			-
k__Bacteria.p__Myxococcota.c__Polyangia.o__Polyangiales.Other.Other	1.7539			-
k__Bacteria.p__Bacteroidota.c__Bacteroidia.o__Cytophagales.f__Cyclobacteriaceae.g__Marinoscillum	0.590953			-
k__Bacteria.p__Firmicutes.c__Clostridia.o__Oscillospirales.f__Ruminococcaceae.g__uncultured	3.99188			2.87582e-05
k__Bacteria.p__Acidobacteriota.c__Subgroup_26.o__Subgroup_26	2.08026			-
k__Bacteria.p__Myxococcota.c__Polyangia.o__Blfdi19.f__Blfdi19	2.19156			-
k__Bacteria.p__Desulfobacterota.c__Desulfobulbia	2.51001			9.46853e-05
k__Bacteria.p__Proteobacteria.c__Gammaproteobacteria.o__Burkholderiales.f__Comamonadaceae.g__Polaromonas	2.03329			-
k__Bacteria.p__Proteobacteria.c__Gammaproteobacteria.o__Pseudomonadales.f__Moraxellaceae.g__Enhydrobacter	1.01571			0.0450106
k__Bacteria.p__Firmicutes.c__Bacilli.o__Lactobacillales.f__Lactobacillaceae.Other	0.903307			-
k__Bacteria.p__Elusimicrobiota.c__Elusimicrobia	2.24728			0.00817928
k__Bacteria.p__Gemmatimonadota.c__Longimicrobia	3.16972			1.1988e-07
k__Bacteria.p__Proteobacteria.c__Alphaproteobacteria.o__Azospirillales.f__uncultured	2.47775			-
k__Bacteria.p__Proteobacteria.c__Alphaproteobacteria.o__Rhodobacterales.f__Rhodobacteraceae.g__Limibaculum	1.78132			-
k__Bacteria.p__Proteobacteria.c__Alphaproteobacteria.o__Azospirillales.f__Azospirillaceae.g__Azospirillum	1.8825			-
k__Bacteria.p__Proteobacteria.c__Gammaproteobacteria.o__Xanthomonadales.f__Xanthomonadaceae.g__Xanthomonas	1.59929			-
k__Bacteria.p__Myxococcota.c__Polyangia.o__Polyangiales.f__BIrii41.g__BIrii41	3.08549			0.000103661
k__Bacteria.p__Proteobacteria.c__Alphaproteobacteria.o__Zavarziniales.f__uncultured.g__uncultured	1.56312			-
k__Bacteria.p__Patescibacteria.c__Parcubacteria.o__Candidatus_Kaiserbacteria	1.58764			-
k__Bacteria.p__Bdellovibrionota	3.00922			1.35063e-05
k__Bacteria.p__Acidobacteriota.c__Acidobacteriae.o__Subgroup_12.f__Subgroup_12	1.27334			-
k__Bacteria.p__Proteobacteria.c__Gammaproteobacteria.o__Enterobacterales.f__Erwiniaceae.g__Pantoea	2.51424			0.0309885
k__Bacteria.p__Firmicutes.c__Clostridia.o__Oscillospirales.f__Ruminococcaceae.g__Incertae_Sedis	3.92724			8.51721e-06
k__Bacteria.p__Firmicutes.c__Clostridia.o__Lachnospirales.f__Lachnospiraceae.g__Acetatifactor	3.28608			0.000219118
k__Bacteria.p__Actinobacteriota.c__Actinobacteria.o__Streptosporangiales.f__Thermomonosporaceae	2.27608			-
k__Bacteria.p__Proteobacteria.c__Alphaproteobacteria.o__Sphingomonadales.f__Sphingomonadaceae.g__Ellin6055	2.38314			0.000992953
k__Bacteria.p__Campilobacterota.c__Campylobacteria.o__Campylobacterales.f__Arcobacteraceae.Other	1.78689			-
k__Bacteria.p__Actinobacteriota.c__Actinobacteria.o__Micromonosporales.f__Micromonosporaceae.g__Dactylosporangium	2.07963			-
k__Bacteria.p__Actinobacteriota.c__Coriobacteriia.o__Coriobacteriales.f__Eggerthellaceae	3.71005			0.000782659
k__Bacteria.p__Proteobacteria.c__Alphaproteobacteria.o__Acetobacterales.f__Acetobacteraceae.g__Asaia	1.89918			-
k__Bacteria.p__Actinobacteriota.c__Actinobacteria.o__Pseudonocardiales.f__Pseudonocardiaceae.g__Actinomycetospora	1.87915			-
k__Bacteria.p__Verrucomicrobiota.c__Omnitrophia	1.49267			-
k__Bacteria.p__Myxococcota.c__Myxococcia.o__Myxococcales	3.17791			1.24e-05
k__Bacteria.p__Actinobacteriota.c__Coriobacteriia	3.86093			5.75339e-05
k__Bacteria.p__Proteobacteria.c__Alphaproteobacteria.Other	2.81968			0.000176637
k__Bacteria.p__Firmicutes.c__Clostridia.o__Clostridiales.f__Clostridiaceae.g__Clostridium_sensu_stricto_13	2.4197			-
k__Bacteria.p__Firmicutes.c__Clostridia.o__Clostridiales.f__Clostridiaceae.g__Clostridium_sensu_stricto_12	1.5655			-
k__Bacteria.p__Proteobacteria.c__Gammaproteobacteria.o__Salinisphaerales	2.88494			9.19361e-05
k__Bacteria.p__Proteobacteria.c__Alphaproteobacteria.o__Rhizobiales.f__A0839.g__A0839	2.40454			-
k__Bacteria.p__Entotheonellaeota.c__Entotheonellia	2.07965			-
k__Bacteria.p__Chloroflexi.c__Anaerolineae.o__SJA_15.f__SJA_15.g__SJA_15	1.83124			-
k__Bacteria.p__Myxococcota.c__Myxococcia.o__Myxococcales.f__Myxococcaceae.Other	1.86415			-
k__Bacteria.p__Actinobacteriota.c__Actinobacteria.o__Micromonosporales	3.18407			4.74159e-07
k__Bacteria.p__Proteobacteria.c__Alphaproteobacteria.o__Rickettsiales.f__uncultured.g__uncultured	0.612304			-
k__Bacteria.p__Gemmatimonadota.c__MD2902_B12.o__MD2902_B12	1.37369			-
k__Bacteria.p__Chloroflexi.c__Anaerolineae.o__Ardenticatenales.Other	1.56816			-
k__Bacteria.p__Nitrospirota.c__Thermodesulfovibrionia.o__uncultured.f__uncultured	1.82974			-
k__Bacteria.p__Proteobacteria.c__Alphaproteobacteria.o__Parvibaculales.f__Parvibaculaceae	1.6843			-
k__Bacteria.p__Proteobacteria.c__Gammaproteobacteria.o__Diplorickettsiales.f__Diplorickettsiaceae.g__Diplorickettsiaceae	1.60414			-
k__Bacteria.p__Actinobacteriota.c__Actinobacteria.o__Streptosporangiales.f__Streptosporangiaceae.Other	1.47387			-
k__Bacteria.p__Proteobacteria.c__Gammaproteobacteria.o__Xanthomonadales.f__Xanthomonadaceae.g__Thermomonas	2.06669			-
k__Bacteria.p__Proteobacteria.c__Gammaproteobacteria.o__Burkholderiales.f__Comamonadaceae.g__uncultured	1.75757			-
k__Bacteria.p__Proteobacteria.c__Gammaproteobacteria.o__Enterobacterales.f__Erwiniaceae.g__Siccibacter	1.82407			-
k__Bacteria.p__Proteobacteria.c__Alphaproteobacteria.o__Rickettsiales.f__uncultured	0.612304			-
k__Bacteria.p__Proteobacteria.c__Alphaproteobacteria.o__Azospirillales.f__Inquilinaceae	1.60856			-
k__Bacteria.p__Desulfobacterota.c__Desulfobulbia.o__Desulfobulbales.f__Desulfocapsaceae.g__Desulforhopalus	1.61969			-
k__Bacteria.p__Campilobacterota.c__Campylobacteria.o__Campylobacterales.f__Arcobacteraceae.g__Pseudarcobacter	1.45365			-
k__Bacteria.p__Gemmatimonadota.c__MD2902_B12	1.37369			-
k__Bacteria.p__Firmicutes.c__Clostridia.o__Lachnospirales.f__Lachnospiraceae.g__Herbinix	0.627109			-
k__Bacteria.p__Proteobacteria.c__Gammaproteobacteria.o__Burkholderiales.f__Comamonadaceae.g__Comamonas	2.55132			-
k__Bacteria.p__Bacteroidota.c__Bacteroidia.o__Bacteroidales.f__Marinifilaceae	4.24549			2.26029e-08
k__Bacteria.p__Gemmatimonadota.c__S0134_terrestrial_group.o__S0134_terrestrial_group.f__S0134_terrestrial_group.g__S0134_terrestrial_group	2.85744			7.83181e-05
k__Bacteria.p__Proteobacteria.c__Alphaproteobacteria.o__Rhizobiales.f__Beijerinckiaceae.g__Roseiarcus	1.8987			-
k__Bacteria.p__Gemmatimonadota.c__Longimicrobia.o__Longimicrobiales.f__Longimicrobiaceae.g__Longimicrobiaceae	2.88327			2.70564e-06
k__Bacteria.p__Desulfobacterota.c__Desulfuromonadia.o__Geobacterales.f__Geobacteraceae.g__Geotalea	1.4687			-
k__Bacteria.p__Bacteroidota.c__Bacteroidia.o__Flavobacteriales.f__Flavobacteriaceae	3.45575			2.63292e-08
k__Bacteria.p__Proteobacteria.c__Gammaproteobacteria.o__Burkholderiales.f__Sutterellaceae.g__Parasutterella	3.49512			5.33503e-06
k__Bacteria.p__Desulfobacterota.c__Desulfuromonadia.o__Geobacterales.f__Geobacteraceae.Other	1.40692			-
k__Bacteria.p__Proteobacteria.c__Alphaproteobacteria.o__SAR11_clade.f__Clade_II	2.43096			0.00109886
k__Bacteria.p__Patescibacteria.c__Parcubacteria.o__Candidatus_Jorgensenbacteria	1.74159			-
k__Bacteria.p__Firmicutes.c__Clostridia.o__Peptostreptococcales_Tissierellales.f__Peptostreptococcales_Tissierellales.g__Finegoldia	1.38671			-
k__Bacteria.p__Proteobacteria.c__Alphaproteobacteria.o__Puniceispirillales.f__Puniceispirillales_Incertae_Sedis.g__Constrictibacter	2.09349			0.0190232
k__Bacteria.p__Bdellovibrionota.c__Bdellovibrionia.o__Bdellovibrionales.f__Bdellovibrionaceae	2.71823			9.93294e-06
k__Bacteria.p__Latescibacterota.c__Latescibacteria.o__Latescibacterales	1.74905			-
k__Bacteria.p__Bacteroidota.c__Bacteroidia.o__Cytophagales.f__Spirosomaceae.g__uncultured	1.28198			-
k__Bacteria.p__Proteobacteria.c__Alphaproteobacteria.o__Tistrellales	2.2726			0.00846764
k__Bacteria.p__Desulfobacterota.c__Desulfuromonadia.o__Geobacterales.f__Geobacteraceae.g__Geobacter	1.2729			-
k__Bacteria.p__Firmicutes.c__Clostridia.o__Peptostreptococcales_Tissierellales.f__Fusibacteraceae	0.63661			-
k__Bacteria.p__Spirochaetota.c__Spirochaetia.o__Spirochaetales.f__Spirochaetaceae.g__Spirochaeta_2	2.13573			-
k__Bacteria.p__Nitrospirota.c__Nitrospiria.o__Nitrospirales.f__Nitrospiraceae.g__Nitrospira	3.04966			2.94843e-05
k__Bacteria.p__Actinobacteriota.Other.Other	2.7004			3.39941e-07
k__Bacteria.p__Proteobacteria.c__Gammaproteobacteria.o__Cardiobacteriales.f__Cardiobacteriaceae.g__Cardiobacterium	1.81285			-
k__Bacteria.p__Actinobacteriota.c__Actinobacteria.o__Nitriliruptorales.f__Nitriliruptoraceae	2.40294			-
k__Bacteria.p__Proteobacteria.c__Gammaproteobacteria.o__Chromatiales.f__Sedimenticolaceae	1.56143			-
k__Bacteria.p__Actinobacteriota.c__Actinobacteria.o__Micromonosporales.f__Micromonosporaceae.g__Micromonospora	2.29432			-
k__Bacteria.p__Proteobacteria.c__Gammaproteobacteria.o__Burkholderiales.f__Rhodocyclaceae.g__Azoarcus	1.8854			-
k__Bacteria.p__Proteobacteria.c__Alphaproteobacteria.o__Rhizobiales.Other.Other	2.57479			0.00246595
k__Bacteria.p__Firmicutes.c__Clostridia.o__Peptostreptococcales_Tissierellales.f__Anaerovoracaceae.Other	1.9961			-
k__Bacteria.p__Bacteroidota.c__Bacteroidia.o__Sphingobacteriales.f__Lentimicrobiaceae.g__Lentimicrobiaceae	1.74875			-
k__Bacteria.p__Proteobacteria.c__Gammaproteobacteria.o__Burkholderiales.f__Methylophilaceae.g__Methylophilus	2.30911			0.00742481
k__Bacteria.p__Acidobacteriota.c__Acidobacteriae.o__PAUC26f.f__PAUC26f	3.31456			2.53594e-06
k__Bacteria.p__Proteobacteria.c__Alphaproteobacteria.o__Puniceispirillales.f__SAR116_clade.g__Candidatus_Puniceispirillum	1.26177			-
k__Bacteria.p__Firmicutes.c__Bacilli.o__Erysipelotrichales.f__Erysipelotrichaceae.g__Allobaculum	2.18514			0.022827
k__Bacteria.p__Patescibacteria.c__Gracilibacteria.o__Gracilibacteria.f__Gracilibacteria.g__Gracilibacteria	1.20648			-
k__Bacteria.p__Patescibacteria.c__Gracilibacteria.o__JGI_0000069_P22.f__JGI_0000069_P22	0.963443			-
k__Bacteria.p__Sva0485.c__Sva0485	1.64726			-
k__Bacteria.p__Bacteroidota.c__Bacteroidia.o__Bacteroidales.f__Marinifilaceae.g__Odoribacter	3.07375			4.51624e-06
k__Bacteria.p__Firmicutes.c__Clostridia.o__Clostridia.f__Hungateiclostridiaceae.g__uncultured	1.36913			-
k__Bacteria.p__Proteobacteria.c__Alphaproteobacteria.o__Dongiales.f__Dongiaceae.g__Dongia	3.05874			1.91198e-06
k__Bacteria.p__Campilobacterota.c__Campylobacteria.o__Campylobacterales.f__Sulfurovaceae	2.33365			-
k__Bacteria.p__Firmicutes.c__Bacilli.o__Thermoactinomycetales.f__Thermoactinomycetaceae	1.62896			-
k__Bacteria.p__Proteobacteria.c__Alphaproteobacteria.o__Acetobacterales.f__Acetobacteraceae.g__Acidiphilium	1.8868			-
k__Bacteria.p__Patescibacteria.c__Parcubacteria.Other.Other	1.73754			-
k__Bacteria.p__Firmicutes.c__Clostridia.o__Peptostreptococcales_Tissierellales.f__Anaerovoracaceae.g__Mogibacterium	1.36913			-
k__Bacteria.p__Chloroflexi	3.24583			4.68624e-06
k__Bacteria.p__Firmicutes.c__Bacilli.o__Lactobacillales.f__Aerococcaceae	2.09037			-
k__Bacteria.p__Proteobacteria.c__Alphaproteobacteria.o__Rhodobacterales.f__Rhodobacteraceae.g__Roseobacter	1.21674			-
k__Bacteria.p__Campilobacterota.c__Campylobacteria.o__Campylobacterales.f__Sulfurovaceae.g__Sulfurovum	2.33365			-
k__Bacteria.p__Bacteroidota.c__Bacteroidia.o__Bacteroidales.f__Bacteroidetes_BD2_2.g__Bacteroidetes_BD2_2	1.96405			0.00337288
k__Bacteria.p__Proteobacteria.c__Alphaproteobacteria.Other.Other	2.81968			0.000176637
k__Bacteria.p__Bacteroidota.c__Bacteroidia.o__Bacteroidales.f__Paludibacteraceae	1.71083			-
k__Bacteria.p__Firmicutes.c__Clostridia.o__Lachnospirales.f__Lachnospiraceae.g__Dorea	3.13135			1.32022e-06
k__Bacteria.p__Proteobacteria.c__Gammaproteobacteria.o__Burkholderiales.f__Methylophilaceae.g__MM2	1.89883			-
k__Bacteria.p__Campilobacterota.c__Campylobacteria	3.54283			3.67451e-06
k__Bacteria.p__Actinobacteriota.c__Acidimicrobiia.o__Acidimicrobiales	1.62896			-
k__Bacteria.p__Verrucomicrobiota.c__Lentisphaeria	1.57897			-
k__Bacteria.p__Desulfobacterota.c__Desulfuromonadia.o__Desulfuromonadia.f__Desulfuromonadaceae	1.87772			0.0408519
k__Bacteria.p__Bacteroidota.c__Kapabacteria.o__Kapabacteriales.f__Kapabacteriales.g__Kapabacteriales	2.43168			0.0177373
k__Bacteria.p__Firmicutes.c__Clostridia.o__Peptostreptococcales_Tissierellales.f__Peptostreptococcaceae.g__Romboutsia	3.2707			1.08404e-05
k__Bacteria.p__Proteobacteria.c__Alphaproteobacteria.o__Sphingomonadales.f__Sphingomonadaceae.g__Porphyrobacter	2.80233			6.56343e-06
k__Bacteria.p__Proteobacteria.c__Gammaproteobacteria.o__Xanthomonadales.f__Xanthomonadaceae.g__Stenotrophomonas	2.53486			0.000524149
k__Bacteria.p__Actinobacteriota.c__Thermoleophilia.o__Gaiellales.Other	2.59528			0.00185934
k__Bacteria.p__Firmicutes.c__Bacilli.o__Erysipelotrichales.f__Erysipelotrichaceae.g__Holdemanella	2.0693			-
k__Bacteria.p__Firmicutes.c__Clostridia.o__Peptostreptococcales_Tissierellales.f__Peptostreptococcaceae.g__Paraclostridium	2.34759			-
k__Bacteria.p__Firmicutes.c__Bacilli.o__Thermoactinomycetales.f__Thermoactinomycetaceae.g__Novibacillus	1.62896			-
k__Bacteria.p__Verrucomicrobiota.c__Chlamydiae.o__Chlamydiales	2.36128			0.00560026
k__Bacteria.p__Proteobacteria.c__Alphaproteobacteria.o__Rickettsiales.f__Rickettsiaceae.g__Candidatus_Megaira	1.21879			-
k__Bacteria.p__Actinobacteriota.c__Thermoleophilia.o__Solirubrobacterales.f__Solirubrobacteraceae.g__uncultured	1.70795			-
k__Bacteria.p__Firmicutes.c__Clostridia.o__Lachnospirales.f__Defluviitaleaceae	3.92041			0.00863371
k__Bacteria.p__Firmicutes.c__Negativicutes.o__Acidaminococcales.f__Acidaminococcaceae.g__Phascolarctobacterium	2.09477			-
k__Bacteria.p__Chloroflexi.c__Anaerolineae.o__Anaerolineae.f__Anaerolineae.g__Anaerolineae	0.924952			-
k__Bacteria.p__Proteobacteria.c__Gammaproteobacteria.o__Burkholderiales.Other	2.49761			0.00135952
k__Bacteria.p__Actinobacteriota.c__Actinobacteria.o__Pseudonocardiales.f__Pseudonocardiaceae.g__Amycolatopsis	2.21407			-
k__Bacteria.p__Proteobacteria.c__Alphaproteobacteria.o__Caedibacterales.f__Caedibacteraceae.g__Caedibacter	1.76608			-
k__Bacteria.p__Proteobacteria.c__Gammaproteobacteria.o__Thiomicrospirales	1.66805			-
k__Bacteria.p__Bacteroidota.c__Bacteroidia.o__Flavobacteriales.Other	1.9892			-
k__Bacteria.p__Bacteroidota.c__Bacteroidia.o__Chitinophagales.f__Chitinophagaceae.g__Pseudoflavitalea	2.05551			-
k__Bacteria.p__Proteobacteria.c__Alphaproteobacteria.o__Rhizobiales.f__Hyphomicrobiaceae.g__Pedomicrobium	2.4025			0.0381709
k__Bacteria.p__Gemmatimonadota.c__PAUC43f_marine_benthic_group.o__PAUC43f_marine_benthic_group.f__PAUC43f_marine_benthic_group.g__PAUC43f_marine_benthic_group	2.22495			-
k__Bacteria.p__Patescibacteria.c__Saccharimonadia.o__Saccharimonadales.Other	2.03909			-
k__Bacteria.p__Fibrobacterota.c__Fibrobacteria.o__Fibrobacterales.f__Fibrobacteraceae.g__possible_genus_04	2.20577			-
k__Bacteria.p__Bacteroidota.c__Bacteroidia.o__Sphingobacteriales.f__KD3_93	1.54911			-
k__Bacteria.p__Desulfobacterota.c__Desulfobacteria.o__Desulfobacterales.f__Desulfosarcinaceae.g__Desulfatirhabdium	1.40692			-
k__Bacteria.p__Proteobacteria.c__Alphaproteobacteria.o__Puniceispirillales.f__EF100_94H03.g__EF100_94H03	1.77157			-
k__Bacteria.p__Proteobacteria.c__Alphaproteobacteria.o__Rhizobiales.f__Hyphomicrobiaceae	2.73662			0.000231456
k__Bacteria.p__Proteobacteria.c__Gammaproteobacteria.o__Burkholderiales.f__Alcaligenaceae.g__Verticiella	1.36451			-
k__Bacteria.p__Patescibacteria.c__Gracilibacteria.o__Gracilibacteria.f__Gracilibacteria	1.20648			-
k__Bacteria.p__Proteobacteria.c__Alphaproteobacteria.o__Micavibrionales.f__uncultured.g__uncultured	2.2061			-
k__Bacteria.p__Calditrichota.c__Calditrichia.o__Calditrichales.f__Calditrichaceae	1.22201			-
k__Bacteria.p__Firmicutes.c__Negativicutes.o__Veillonellales_Selenomonadales.f__Selenomonadaceae	1.9564			-
k__Bacteria.p__Proteobacteria.c__Gammaproteobacteria.o__Nitrosococcales	2.38111			0.000665122
k__Bacteria.p__Elusimicrobiota.c__Lineage_IIc.o__Lineage_IIc	1.69439			-
k__Bacteria.p__Proteobacteria.c__Gammaproteobacteria.o__Salinisphaerales.f__Solimonadaceae.Other	1.91688			-
k__Bacteria.p__Proteobacteria.c__Alphaproteobacteria.o__Elsterales.f__Elsteraceae.Other	1.08568			-
k__Bacteria.p__Actinobacteriota.c__Actinobacteria.o__Frankiales.f__Geodermatophilaceae	2.7522			0.000635455
k__Bacteria.p__Actinobacteriota.c__Actinobacteria.o__PeM15.f__PeM15.g__PeM15	2.01728			-
k__Bacteria.p__Bacteroidota.c__Bacteroidia.o__Chitinophagales.f__Chitinophagaceae.g__Segetibacter	1.7658			0.046543
k__Bacteria.p__Proteobacteria.c__Gammaproteobacteria.o__Burkholderiales.f__Comamonadaceae.g__Mitsuaria	1.62415			-
k__Bacteria.p__Bacteroidota.c__Bacteroidia.o__Flavobacteriales.f__Flavobacteriaceae.g__Actibacter	2.12347			0.0152503
k__Bacteria.p__Firmicutes.c__Bacilli.o__Erysipelotrichales.f__Erysipelatoclostridiaceae	4.25858			1.72956e-07
k__Bacteria.p__Bacteroidota.c__Bacteroidia.o__Bacteroidales.f__Bacteroidetes_vadinHA17	1.37406			-
k__Bacteria.p__Acidobacteriota.c__Acidobacteriae.o__Solibacterales	2.92981			0.00044952
k__Bacteria.p__Actinobacteriota.c__Coriobacteriia.o__Coriobacteriales.f__Atopobiaceae.g__Atopobium	2.38159			-
k__Bacteria.p__Proteobacteria.c__Gammaproteobacteria.o__Pasteurellales	3.91209			5.97891e-07
k__Bacteria.p__Bacteroidota.c__Bacteroidia.o__Chitinophagales.f__37_13.g__37_13	2.21681			0.0152152
k__Bacteria.p__Firmicutes.c__Clostridia.o__Christensenellales	3.45844			1.08592e-05
k__Bacteria.p__Proteobacteria.c__Alphaproteobacteria.o__Rhizobiales.f__Rhizobiales_Incertae_Sedis.g__Phreatobacter	2.55862			1.83887e-05
k__Bacteria.p__Desulfobacterota.c__Syntrophorhabdia.o__Syntrophorhabdales	0.61704			-
k__Bacteria.p__Acidobacteriota.c__Subgroup_21	0.32774			-
k__Bacteria.p__Acidobacteriota.c__Subgroup_22	2.62808			0.00734574
k__Bacteria.p__Firmicutes.c__Bacilli.o__Bacillales.f__Bacillaceae.g__Bacillus	3.02016			2.84095e-05
k__Bacteria.p__Acidobacteriota.c__Subgroup_25	2.31613			-
k__Bacteria.p__Acidobacteriota.c__Subgroup_26	2.08026			-
k__Bacteria.p__Actinobacteriota.c__Acidimicrobiia.o__Microtrichales.f__Ilumatobacteraceae.g__uncultured	2.60395			0.0126535
k__Bacteria.p__Desulfobacterota.c__Desulfuromonadia.o__Desulfuromonadia.f__Geopsychrobacteraceae.g__Desulfuromusa	0.662413			-
k__Bacteria.p__Actinobacteriota.c__Actinobacteria.o__Corynebacteriales.f__Mycobacteriaceae	2.55592			1.25815e-05
k__Bacteria.p__Proteobacteria.c__Gammaproteobacteria.o__Xanthomonadales.f__Rhodanobacteraceae.g__Dokdonella	2.09203			-
k__Bacteria.p__Firmicutes.c__Bacilli.o__Staphylococcales.f__Gemellaceae	2.40853			0.00121416
k__Bacteria.p__Gemmatimonadota.c__S0134_terrestrial_group	2.85744			7.83181e-05
k__Bacteria.p__Acidobacteriota.c__Acidobacteriae.o__Acidobacteriales	3.59461			5.09527e-06
k__Bacteria.p__Myxococcota.c__Polyangia.o__Polyangiales	3.22585			2.04722e-06
k__Bacteria.p__Bacteroidota.c__Bacteroidia.o__Chitinophagales.f__Chitinophagaceae.g__Niastella	2.33329			0.0489924
k__Bacteria.p__Proteobacteria.c__Gammaproteobacteria.o__Oceanospirillales.f__Halomonadaceae	1.72892			-
k__Bacteria.p__Bacteroidota.c__Bacteroidia.o__Bacteroidales.f__Bacteroidaceae	5.04412	S-C	4.74573	9.43302e-08
k__Bacteria.p__Proteobacteria.c__Gammaproteobacteria.o__Pasteurellales.f__Pasteurellaceae.Other	1.22175			-
k__Bacteria.p__Proteobacteria.c__Gammaproteobacteria.o__MBMPE27.f__MBMPE27	1.36509			-
k__Bacteria.p__Firmicutes.c__Bacilli.o__RF39.f__RF39.g__RF39	2.01199			0.0203729
k__Bacteria.p__Proteobacteria.c__Alphaproteobacteria.o__Caulobacterales.f__Parvularculaceae.g__Amphiplicatus	1.66134			-
k__Bacteria.p__Actinobacteriota.Other.Other.Other.Other	2.7004			3.39941e-07
k__Bacteria.p__Proteobacteria.c__Gammaproteobacteria.o__Burkholderiales.f__Alcaligenaceae.Other	2.1524			0.018093
k__Bacteria.p__Proteobacteria.c__Gammaproteobacteria.o__Oceanospirillales.f__Nitrincolaceae	1.84108			-
k__Bacteria.p__Chloroflexi.c__Dehalococcoidia.o__Dehalococcoidales	1.47387			-
k__Bacteria.p__Myxococcota.c__Polyangia.o__Nannocystales.f__Nannocystaceae.g__Nannocystaceae	1.88478			-
k__Bacteria.p__Deinococcota.c__Deinococci	1.64995			-
k__Bacteria.p__Bacteroidota.c__Bacteroidia.o__Bacteroidales.f__Bacteroidales_UCG_001.g__Bacteroidales_UCG_001	1.87793			0.0329924
k__Bacteria.p__Actinobacteriota.c__Actinobacteria.o__Micromonosporales.f__Micromonosporaceae.Other	2.74564			3.76381e-05
k__Bacteria.p__Proteobacteria.c__Alphaproteobacteria.o__Caulobacterales.f__Hyphomonadaceae.Other	1.79014			-
k__Bacteria.p__Chloroflexi.c__Anaerolineae.o__SJA_15.f__SJA_15	1.83124			-
k__Bacteria.p__Myxococcota.c__Myxococcia.o__Myxococcales.f__Myxococcaceae.g__Archangium	1.84163			-
k__Bacteria.p__Actinobacteriota.c__Actinobacteria.o__Nitriliruptorales	2.40294			-
k__Bacteria.p__Proteobacteria.c__Gammaproteobacteria.o__Enterobacterales.f__Morganellaceae	3.6054			7.96744e-07
k__Bacteria.p__Bacteroidota.c__Bacteroidia.o__Bacteroidales.f__Prolixibacteraceae.g__Roseimarinus	2.00908			-
k__Bacteria.p__Chloroflexi.c__Anaerolineae	2.18847			-
k__Bacteria.p__Proteobacteria.c__Alphaproteobacteria.o__Rhizobiales.f__Beijerinckiaceae.g__Methylovirgula	1.73939			-
k__Bacteria.p__Proteobacteria.c__Gammaproteobacteria.o__Cellvibrionales.f__Spongiibacteraceae.Other	1.66683			-
k__Bacteria.p__Bacteroidota.c__Bacteroidia.o__Sphingobacteriales.f__Sphingobacteriaceae.g__Pedobacter	1.88745			-
k__Bacteria.p__RCP2_54.c__RCP2_54	2.64464			0.000300961
k__Bacteria.p__Myxococcota.c__Polyangia.o__Polyangiales.f__BIrii41	3.08549			0.000103661
k__Bacteria.p__Firmicutes.c__Clostridia.o__uncultured.f__uncultured	3.03316			1.90849e-06
k__Bacteria.p__Proteobacteria.c__Gammaproteobacteria.o__Cellvibrionales.f__Spongiibacteraceae	1.66683			-
k__Bacteria.p__Actinobacteriota.c__Actinobacteria.o__Streptomycetales.f__Streptomycetaceae.g__Streptomyces	3.39897			1.43767e-06
k__Bacteria.p__Actinobacteriota.c__Actinobacteria.o__Kineosporiales.f__Kineosporiaceae	2.0558			-
k__Bacteria.p__Firmicutes.c__Clostridia.o__Oscillospirales.f__Oscillospiraceae.Other	4.10374			0.00024524
k__Bacteria.p__Firmicutes.c__Clostridia.o__Lachnospirales.f__Lachnospiraceae.g__Syntrophococcus	1.47533			-
k__Bacteria.p__Proteobacteria.c__Gammaproteobacteria.o__Burkholderiales.f__Rhodocyclaceae	2.81251			6.58398e-06
k__Bacteria.p__Proteobacteria.c__Gammaproteobacteria.o__Burkholderiales.f__Sutterellaceae.g__Sutterella	3.52434			1.33425e-06
k__Bacteria.p__Patescibacteria.c__Saccharimonadia.o__Saccharimonadales	2.75524			0.000128352
k__Bacteria.p__Proteobacteria.c__Gammaproteobacteria.o__KI89A_clade.f__KI89A_clade.g__KI89A_clade	2.06349			-
k__Bacteria.p__Myxococcota.c__bacteriap25.o__bacteriap25	2.58322			0.0012916
k__Bacteria.p__Bacteroidota.c__Bacteroidia.o__Sphingobacteriales	3.15408			2.32304e-06
k__Bacteria.p__Actinobacteriota.c__Coriobacteriia.o__Coriobacteriales.f__Eggerthellaceae.g__Gordonibacter	2.00977			-
k__Bacteria.p__Patescibacteria.c__Parcubacteria.o__Candidatus_Jorgensenbacteria.f__Candidatus_Jorgensenbacteria.g__Candidatus_Jorgensenbacteria	1.74159			-
k__Bacteria.p__Firmicutes.c__Bacilli.o__Exiguobacterales	1.82972			-
k__Bacteria.p__Gemmatimonadota.c__MD2902_B12.o__MD2902_B12.f__MD2902_B12.g__MD2902_B12	1.37369			-
k__Bacteria.p__Myxococcota.c__Myxococcia	3.17791			1.24e-05
k__Bacteria.p__Proteobacteria.c__Alphaproteobacteria.o__Kiloniellales.f__Kiloniellaceae.g__uncultured	1.96385			-
k__Bacteria.p__Firmicutes.c__Clostridia.o__Oscillospirales.f__Butyricicoccaceae.g__UCG_009	3.25865			1.73292e-06
k__Bacteria.p__Actinobacteriota.c__Acidimicrobiia.o__Actinomarinales.f__uncultured.g__uncultured	2.7486			5.0245e-05
k__Bacteria.p__Firmicutes.c__Clostridia.o__Monoglobales.f__Monoglobaceae	2.98676			2.66549e-05
k__Bacteria.p__Myxococcota.c__Myxococcia.o__Myxococcales.f__Myxococcaceae.g__uncultured	2.99724			7.06298e-06
k__Bacteria.p__Verrucomicrobiota.c__Verrucomicrobiae.o__Pedosphaerales.f__Pedosphaeraceae.g__Oikopleura	1.64088			-
k__Bacteria.p__Proteobacteria.c__Gammaproteobacteria.o__Burkholderiales.f__uncultured	1.84484			-
k__Bacteria.p__Proteobacteria.c__Alphaproteobacteria.o__Rhizobiales.f__Methyloligellaceae	2.22057			-
k__Bacteria.p__Proteobacteria.c__Gammaproteobacteria.o__Xanthomonadales.f__Rhodanobacteraceae.g__uncultured	2.0893			0.0199162
k__Bacteria.p__Firmicutes.c__Clostridia.o__Lachnospirales.Other	2.83985			0.00078073
k__Bacteria.p__Acidobacteriota.c__Acidobacteriae.o__PAUC26f	3.31456			2.53594e-06
k__Bacteria.p__Bacteroidota.c__Bacteroidia.o__Sphingobacteriales.f__Sphingobacteriaceae.g__Solitalea	1.96964			-
k__Bacteria.p__Bdellovibrionota.c__Oligoflexia.o__Oligoflexales.f__Oligoflexales	1.1688			-
k__Bacteria.p__Firmicutes.c__Clostridia.o__Oscillospirales.f__Ruminococcaceae	5.01658			-
k__Bacteria.p__Actinobacteriota.c__Actinobacteria.o__Bifidobacteriales.f__Bifidobacteriaceae.g__Bifidobacterium	3.65611			1.66811e-06
k__Bacteria.p__Firmicutes.c__Clostridia.o__Lachnospirales.f__Lachnospiraceae.g__Blautia	4.90628	L-NR	4.60727	0.00128535
k__Bacteria.p__Actinobacteriota.c__Actinobacteria.o__Micrococcales.f__Promicromonosporaceae	2.43279			0.00901827
k__Bacteria.p__FCPU426.c__FCPU426.o__FCPU426	1.80344			-
k__Bacteria.p__Firmicutes.c__Bacilli.o__Lactobacillales.Other	1.13953			-
k__Bacteria.p__Proteobacteria.c__Gammaproteobacteria.o__Enterobacterales.f__Enterobacteriaceae.g__Kosakonia	2.72413			0.00411246
k__Bacteria.p__Proteobacteria.c__Alphaproteobacteria.o__Caedibacterales	1.76608			-
k__Bacteria.p__Proteobacteria.c__Gammaproteobacteria.o__Pseudomonadales	3.93853			3.381e-07
k__Bacteria.p__Proteobacteria.c__Alphaproteobacteria.o__Defluviicoccales	2.10839			-
k__Bacteria.p__Proteobacteria.c__Gammaproteobacteria.o__1013_28_CG33	1.80153			-
k__Bacteria.p__Firmicutes.c__Bacilli.o__Staphylococcales.f__Staphylococcaceae	3.94058			4.8821e-08
k__Bacteria.p__Proteobacteria.c__Gammaproteobacteria.o__Burkholderiales.f__Methylophilaceae.g__Methylobacillus	1.50284			-
k__Bacteria.p__Desulfobacterota.c__Desulfuromonadia.o__Desulfuromonadia	2.1503			0.00536323
k__Bacteria.p__Proteobacteria.c__Alphaproteobacteria.o__Micavibrionales.Other	1.62735			-
k__Bacteria.p__Firmicutes.c__Clostridia.o__Lachnospirales.f__Lachnospiraceae.g__Fusicatenibacter	2.93671			7.91442e-06
k__Bacteria.p__Myxococcota.c__Polyangia.Other.Other	1.97273			-
k__Bacteria.p__Bacteroidota.c__Bacteroidia.o__Flavobacteriales.f__Flavobacteriaceae.g__Salinimicrobium	1.5628			-
k__Bacteria.p__Firmicutes.c__Clostridia.o__Lachnospirales.f__Lachnospiraceae.g__uncultured	4.76179	S-C	4.42516	3.21701e-05
k__Bacteria.p__Actinobacteriota.c__Actinobacteria.o__Frankiales.Other	1.59741			-
k__Bacteria.p__Actinobacteriota.c__Coriobacteriia.o__CG2_30_50_142.f__CG2_30_50_142	1.80474			-
k__Bacteria.p__Proteobacteria.c__Gammaproteobacteria.o__Coxiellales	1.55415			-
k__Bacteria.p__Bacteroidota.c__Bacteroidia.o__Bacteroidales.f__Porphyromonadaceae.g__Porphyromonas	3.22103			2.331e-06
k__Bacteria.p__Actinobacteriota.c__Rubrobacteria.o__Rubrobacterales	3.06972			2.52608e-05
k__Bacteria.p__Proteobacteria.c__Gammaproteobacteria.o__Tenderiales	1.47054			-
k__Bacteria.p__Proteobacteria.c__Alphaproteobacteria.o__Rhodospirillales.f__Rhodospirillaceae	1.78846			-
k__Bacteria.p__Spirochaetota.c__Brevinematia	2.82566			1.88257e-05
k__Bacteria.p__Firmicutes.c__Clostridia.o__Oscillospirales.f__Oscillospiraceae.g__Flavonifractor	2.62065			0.00209202
k__Bacteria.p__Desulfobacterota.c__Desulfobaccia.o__Desulfobaccales	1.27316			-
k__Bacteria.p__Actinobacteriota.c__Thermoleophilia.Other.Other	2.15875			0.0157564
k__Bacteria.p__Desulfobacterota.c__Desulfovibrionia.o__Desulfovibrionales.f__Desulfovibrionaceae.g__Bilophila	4.35213	S-C	4.0527	1.09733e-07
k__Bacteria.p__Firmicutes.c__Bacilli.o__Lactobacillales.f__Leuconostocaceae	3.15724			2.24791e-05
k__Bacteria.p__Proteobacteria.c__Alphaproteobacteria.o__Rhodobacterales.f__Rhodobacteraceae.g__Silicimonas	1.76401			0.0329924
k__Bacteria.p__Bacteroidota.c__Bacteroidia.o__Chitinophagales.f__Saprospiraceae.g__Lewinella	1.41185			-
k__Bacteria.p__Acidobacteriota.c__Acidobacteriae.o__Acidobacteriales.f__uncultured.g__uncultured	3.30171			6.12366e-06
k__Bacteria.p__Bacteroidota.c__Bacteroidia.o__Chitinophagales.f__Chitinophagaceae.g__Puia	2.35648			0.0258274
k__Bacteria.p__Bacteroidota.c__Bacteroidia.o__Bacteroidales.f__uncultured	2.21428			3.89942e-05
k__Bacteria.p__Firmicutes.c__Clostridia.o__Lachnospirales.f__Lachnospiraceae.g__Roseburia	4.39284			-
k__Bacteria.p__Cyanobacteria.c__Cyanobacteriia	2.36861			0.000408401
k__Bacteria.p__Actinobacteriota.c__Actinobacteria.o__Micrococcales.f__Brevibacteriaceae.g__Brevibacterium	1.53747			-
k__Bacteria.p__Armatimonadota.c__Fimbriimonadia.o__Fimbriimonadales.f__Fimbriimonadaceae.g__Fimbriimonadaceae	1.76931			-
k__Bacteria.p__Firmicutes.c__Bacilli.o__Mycoplasmatales.f__Mycoplasmataceae.g__Candidatus_Bacilloplasma	1.40175			-
k__Bacteria.p__Actinobacteriota.c__Acidimicrobiia.o__Acidimicrobiales.f__Acidimicrobiaceae.g__Ferrithrix	1.62896			-
k__Bacteria.p__Acidobacteriota.c__Blastocatellia	1.72568			-
k__Bacteria.p__Firmicutes.c__Clostridia.o__Lachnospirales.f__Lachnospiraceae.g__Marvinbryantia	4.18302			0.000240857
k__Bacteria.p__Nitrospirota.c__Leptospirillia.o__Leptospirillales.f__Leptospirillaceae	1.90175			-
k__Bacteria.p__Patescibacteria.c__Saccharimonadia.o__Saccharimonadales.f__S32	2.23918			-
k__Bacteria.p__Cyanobacteria.c__Vampirivibrionia.o__Vampirovibrionales	1.85405			-
k__Bacteria.p__Acidobacteriota	4.07064			7.97213e-07
k__Bacteria.p__Proteobacteria.c__Gammaproteobacteria.o__uncultured	1.86352			-
k__Bacteria.p__Firmicutes.c__Negativicutes.o__Veillonellales_Selenomonadales.f__Veillonellaceae.g__Anaeroglobus	1.22566			-
k__Bacteria.p__Verrucomicrobiota.c__Verrucomicrobiae.o__Pedosphaerales.f__Pedosphaeraceae	2.37539			0.000115888
k__Bacteria.p__Proteobacteria.c__Gammaproteobacteria.o__Burkholderiales.f__Neisseriaceae.g__uncultured	0.308296			-
k__Bacteria.p__Firmicutes.c__Negativicutes.o__Veillonellales_Selenomonadales.f__Sporomusaceae	1.62975			-
k__Bacteria.p__Proteobacteria.c__Alphaproteobacteria.o__Rickettsiales.Other.Other	2.15024			-
k__Bacteria.p__Proteobacteria.c__Gammaproteobacteria.o__Burkholderiales.f__Comamonadaceae.g__Piscinibacter	1.23491			-
k__Bacteria.p__Proteobacteria.c__Alphaproteobacteria.o__Rhizobiales.f__D05_2	1.91418			-
k__Bacteria.p__Bacteroidota.c__Bacteroidia.o__Bacteroidales.f__Prevotellaceae.Other	3.57939			2.90434e-06
k__Bacteria.p__Chloroflexi.c__Dehalococcoidia.o__Dehalococcoidales.f__Dehalococcoidaceae.g__Dehalogenimonas	1.47387			-
k__Bacteria.p__Actinobacteriota.c__Actinobacteria.o__Propionibacteriales.f__Propionibacteriaceae.Other	1.57781			-
k__Bacteria.p__Firmicutes	5.9828	L-NOB	5.50508	7.63715e-07
k__Bacteria.p__Proteobacteria.c__Alphaproteobacteria.o__Rhodospirillales	2.93781			2.02623e-05
k__Bacteria.p__Actinobacteriota.c__Coriobacteriia.o__Coriobacteriales.f__Atopobiaceae.g__Olsenella	2.05495			-
k__Bacteria.p__Myxococcota.c__Myxococcia.o__Myxococcales.f__Anaeromyxobacteraceae.g__Anaeromyxobacter	2.51043			0.00826365
k__Bacteria.p__Acidobacteriota.c__Acidobacteriae.o__Subgroup_2	2.24225			-
k__Bacteria.p__Bacteroidota.c__Bacteroidia.o__Sphingobacteriales.f__AKYH767	1.31563			-
k__Bacteria.p__Firmicutes.c__Clostridia.o__Peptococcales	3.24533			1.58013e-06
k__Bacteria.p__Proteobacteria.c__Alphaproteobacteria.o__Parvibaculales	1.6843			-
k__Bacteria.p__Actinobacteriota.c__Thermoleophilia.o__Solirubrobacterales.f__Solirubrobacteraceae.g__Conexibacter	2.36346			-
k__Bacteria.p__Gemmatimonadota.c__Gemmatimonadetes	3.92292			9.00361e-07
k__Bacteria.p__Firmicutes.c__Clostridia.o__Eubacteriales.f__Eubacteriaceae.g__uncultured	1.69439			-
k__Bacteria.p__Chloroflexi.c__Ktedonobacteria.o__Ktedonobacterales	3.00101			2.08653e-05
k__Bacteria.p__Proteobacteria.c__Gammaproteobacteria.o__Enterobacterales.Other	1.43706			-
k__Bacteria.p__Actinobacteriota.c__Actinobacteria.o__Micrococcales.f__Promicromonosporaceae.g__Promicromonospora	2.38947			-
k__Bacteria.p__Gemmatimonadota.Other	1.66108			-
k__Bacteria.p__Myxococcota.c__Myxococcia.o__Myxococcales.f__27F_1492R.g__27F_1492R	0.624015			-
k__Bacteria.p__Bacteroidota.c__Bacteroidia.o__Flavobacteriales.f__Crocinitomicaceae	1.84572			-
k__Bacteria.p__Acidobacteriota.c__Acidobacteriae.o__Acidobacteriales.f__Koribacteraceae	2.68137			0.0178408
k__Bacteria.p__Actinobacteriota.c__Actinobacteria.o__Micrococcales.f__Micrococcaceae.g__Sinomonas	2.28833			-
k__Bacteria.p__SAR324_clade_Marine_group_B_.c__SAR324_clade_Marine_group_B_.o__SAR324_clade_Marine_group_B_	2.15525			-
k__Bacteria.p__Proteobacteria.c__Gammaproteobacteria.o__Burkholderiales.f__A21b	0.623666			-
k__Bacteria.p__Acidobacteriota.c__Holophagae.o__Subgroup_7	3.12022			2.92532e-06
k__Bacteria.p__Bacteroidota.c__Bacteroidia.o__Bacteroidales.f__Barnesiellaceae.g__Coprobacter	2.27007			0.0448085
k__Bacteria.p__Firmicutes.c__Bacilli.o__Paenibacillales.f__Paenibacillaceae	2.18188			-
k__Bacteria.p__Firmicutes.c__Bacilli.o__Staphylococcales	3.9522			4.20993e-08
k__Bacteria.p__Proteobacteria.c__Gammaproteobacteria.o__PLTA13	2.88254			8.29747e-05
k__Bacteria.p__Verrucomicrobiota.c__Verrucomicrobiae.o__Verrucomicrobiales.f__DEV007.g__DEV007	1.39207			-
k__Bacteria.p__Proteobacteria.c__Gammaproteobacteria.o__Alteromonadales.f__Shewanellaceae.g__Shewanella	2.23586			-
k__Bacteria.p__Proteobacteria.c__Gammaproteobacteria.o__Acidiferrobacterales	1.73155			-
k__Bacteria.p__Proteobacteria.c__Gammaproteobacteria.o__Burkholderiales.f__Comamonadaceae.g__Xylophilus	1.71892			-
k__Bacteria.p__Actinobacteriota.c__Actinobacteria.o__Micrococcales.f__Microbacteriaceae	2.56894			0.000527151
k__Bacteria.p__Bacteroidota.c__Bacteroidia.o__Chitinophagales.f__Chitinophagaceae.g__Flavisolibacter	2.59534			0.0123579
k__Bacteria.p__Chloroflexi.Other	2.32676			0.00920644
k__Bacteria.p__Nitrospirota.c__Leptospirillia	1.90175			-
k__Bacteria.p__Actinobacteriota.c__Actinobacteria.o__Frankiales.Other.Other	1.59741			-
k__Bacteria.p__Proteobacteria.c__Gammaproteobacteria.o__Enterobacterales.f__Enterobacteriaceae.g__Citrobacter	2.83669			1.37957e-05
k__Bacteria.p__Cyanobacteria.c__Sericytochromatia.o__Sericytochromatia.f__Sericytochromatia.g__Sericytochromatia	2.24013			-
k__Bacteria.p__Proteobacteria.c__Gammaproteobacteria.o__Burkholderiales.f__Comamonadaceae.g__Methylibium	1.41016			-
k__Bacteria.p__Proteobacteria.c__Gammaproteobacteria.o__Burkholderiales.f__Burkholderiaceae.g__Cupriavidus	2.00484			-
k__Bacteria.p__Firmicutes.c__Clostridia.o__Oscillospirales.f__Ruminococcaceae.g__CAG_352	1.62473			-
k__Bacteria.p__Bacteroidota.c__Bacteroidia.o__Cytophagales.f__Spirosomaceae.g__Dyadobacter	1.93511			-
k__Bacteria.p__Proteobacteria.c__Alphaproteobacteria.o__Reyranellales.f__Reyranellaceae.g__Reyranella	2.86389			6.25076e-06
k__Bacteria.p__Bacteroidota.c__Ignavibacteria.o__Ignavibacteriales.f__PHOS_HE36.g__PHOS_HE36	1.67246			0.00792646
k__Bacteria.p__Actinobacteriota.c__Actinobacteria.o__Pseudonocardiales.f__Pseudonocardiaceae.g__Crossiella	2.07296			-
k__Bacteria.p__Acidobacteriota.c__Holophagae.o__Holophagales	2.70376			0.00248562
k__Bacteria.p__Deinococcota.c__Deinococci.o__Deinococcales	1.64995			-
k__Bacteria.p__Actinobacteriota.c__Thermoleophilia.o__uncultured.f__uncultured.g__uncultured	1.88999			-
k__Bacteria.p__Bdellovibrionota.c__Oligoflexia	2.65309			2.28047e-05
k__Bacteria.p__Actinobacteriota.c__Thermoleophilia.o__Solirubrobacterales.f__Solirubrobacteraceae.g__Patulibacter	2.00946			0.0408519
k__Bacteria.p__Patescibacteria.c__Parcubacteria.o__Candidatus_Kaiserbacteria.f__Candidatus_Kaiserbacteria.g__Candidatus_Kaiserbacteria	1.58764			-
k__Bacteria.p__LCP_89.c__LCP_89.o__LCP_89	1.31289			-
k__Bacteria.p__Fibrobacterota.c__Fibrobacteria.o__Fibrobacterales.f__Fibrobacteraceae.g__Fibrobacter	2.04381			0.0416431
k__Bacteria.p__Patescibacteria.c__Parcubacteria.Other.Other.Other	1.73754			-
k__Bacteria.p__Proteobacteria.c__Gammaproteobacteria.Other.Other.Other	2.86226			4.44079e-05
k__Bacteria.p__Proteobacteria.c__Gammaproteobacteria.o__Alteromonadales.f__Marinobacteraceae	1.54493			-
k__Bacteria.p__Firmicutes.c__Clostridia.o__Oscillospirales.f__UCG_010.g__UCG_010	3.28383			1.35793e-06
k__Bacteria.p__Proteobacteria.c__Gammaproteobacteria.o__Alteromonadales	2.82183			0.000196851
k__Bacteria.p__Gemmatimonadota.c__AKAU4049.o__AKAU4049.f__AKAU4049	1.99375			-
k__Bacteria.p__Firmicutes.c__Clostridia.o__Lachnospirales.f__Lachnospiraceae.g__Coprococcus	3.78223			2.31113e-07
k__Bacteria.p__Myxococcota.c__Polyangia.o__VHS_B3_70.f__VHS_B3_70	1.7413			-
k__Bacteria.p__Proteobacteria.c__Alphaproteobacteria.o__Caulobacterales.f__Hyphomonadaceae	3.17238			1.00858e-06
k__Bacteria.p__Fusobacteriota.c__Fusobacteriia	3.80599			3.24797e-07
k__Bacteria.p__Myxococcota.c__Polyangia.o__Nannocystales.f__Nannocystaceae	2.31762			-
k__Bacteria.p__Desulfobacterota.c__Desulfuromonadia.o__MA_28_I98C.f__MA_28_I98C.g__MA_28_I98C	1.81433			-
k__Bacteria.p__Proteobacteria.c__Alphaproteobacteria.o__Azospirillales.f__uncultured.g__uncultured	2.47775			-
k__Bacteria.p__Proteobacteria.c__Gammaproteobacteria.o__Vibrionales.f__Vibrionaceae.g__Aliivibrio	1.816			-
k__Bacteria.p__Proteobacteria.c__Gammaproteobacteria.o__SS1_B_09_64.f__SS1_B_09_64	1.85081			-
k__Bacteria.p__Bacteroidota.c__Ignavibacteria.o__Ignavibacteriales.f__BSV40	1.66499			-
k__Bacteria.p__Desulfobacterota.c__uncultured.o__uncultured.f__uncultured.g__uncultured	2.3375			0.018647
k__Bacteria.p__Gemmatimonadota.c__S0134_terrestrial_group.o__S0134_terrestrial_group	2.85744			7.83181e-05
k__Bacteria.p__Patescibacteria.c__Parcubacteria.o__Parcubacteria	1.6843			-
k__Bacteria.p__Proteobacteria.c__Alphaproteobacteria.o__SAR11_clade.f__Clade_I.Other	1.67801			-
k__Bacteria.p__Bacteroidota.c__Bacteroidia.o__Bacteroidales.f__Prolixibacteraceae.Other	1.93649			-
k__Bacteria.p__Firmicutes.c__Bacilli.o__Erysipelotrichales.f__Erysipelatoclostridiaceae.g__Erysipelotrichaceae_UCG_003	2.71086			0.0239277
k__Bacteria.p__Proteobacteria.c__Gammaproteobacteria.o__Diplorickettsiales.f__Diplorickettsiaceae.g__Aquicella	2.30272			0.00831552
k__Bacteria.p__Proteobacteria.c__Alphaproteobacteria.o__Rhizobiales.f__Kaistiaceae	1.37391			-
k__Bacteria.p__Desulfobacterota.c__Desulfuromonadia.o__Desulfuromonadia.f__Geothermobacteraceae	1.38671			-
k__Bacteria.p__Proteobacteria.c__Alphaproteobacteria.o__Rickettsiales	2.65627			0.00576517
k__Bacteria.p__Proteobacteria.c__Alphaproteobacteria.o__Rickettsiales.f__SM2D12.g__SM2D12	2.31488			0.0388364
k__Bacteria.p__Firmicutes.c__Bacilli.o__Erysipelotrichales.f__Erysipelatoclostridiaceae.Other	1.20648			-
k__Bacteria.p__Desulfobacterota.c__Desulfovibrionia.o__Desulfovibrionales.f__Desulfovibrionaceae.g__Mailhella	0.318918			-
k__Bacteria.p__Actinobacteriota.c__Acidimicrobiia.o__IMCC26256.f__IMCC26256.g__IMCC26256	3.20352			7.00272e-06
k__Bacteria.p__Elusimicrobiota.c__Lineage_IIa.o__Lineage_IIa.f__Lineage_IIa.g__Lineage_IIa	1.72426			-
k__Bacteria.p__Firmicutes.c__Clostridia.o__Oscillospirales.f__Oscillospirales.g__Hydrogenoanaerobacterium	1.6207			8.67939e-06
k__Bacteria.p__Proteobacteria.c__Gammaproteobacteria.o__Diplorickettsiales	2.30272			0.00708064
k__Bacteria.p__Proteobacteria.c__Gammaproteobacteria.o__CCM19a.f__CCM19a.g__CCM19a	0.623073			-
k__Bacteria.p__Spirochaetota.c__Leptospirae.o__Leptospirales.f__Leptospiraceae	1.71126			-
k__Bacteria.p__Proteobacteria.c__Gammaproteobacteria.o__Salinisphaerales.f__Salinisphaeraceae.g__Salinisphaera	1.81768			-
k__Bacteria.p__Proteobacteria.c__Alphaproteobacteria.o__Tistrellales.f__Geminicoccaceae	2.2726			0.00846764
k__Bacteria.p__Desulfobacterota.c__Desulfobacteria.o__Desulfobacterales	2.39156			0.000843747
k__Bacteria.p__Proteobacteria.c__Alphaproteobacteria.o__Micropepsales.f__Micropepsaceae.g__Rhizomicrobium	1.66499			-
k__Bacteria.p__Proteobacteria.c__Gammaproteobacteria.o__Xanthomonadales.f__Rhodanobacteraceae.g__Rhodanobacteraceae	0.291464			-
k__Bacteria.p__Bacteroidota.c__Rhodothermia.o__Balneolales.f__Balneolaceae.g__uncultured	2.07787			-
k__Bacteria.p__Desulfobacterota.c__Desulfuromonadia.o__Bradymonadales	2.02081			0.00792646
k__Bacteria.p__Proteobacteria.c__Gammaproteobacteria.o__Enterobacterales.f__Enterobacteriaceae.g__Enterobacter	3.32721			2.10622e-07
k__Bacteria.p__Proteobacteria.c__Alphaproteobacteria.o__Sphingomonadales.f__Sphingomonadaceae.g__Sphingobium	2.68511			0.0485637
k__Bacteria.p__Proteobacteria.c__Alphaproteobacteria.o__Rickettsiales.f__Rickettsiales	1.70391			-
k__Bacteria.p__Gemmatimonadota.c__Gemmatimonadetes.o__Gemmatimonadales.f__Gemmatimonadaceae	3.92292			9.00361e-07
k__Bacteria.p__Firmicutes.c__Bacilli.o__Lactobacillales.f__Streptococcaceae.g__Streptococcus	4.99025	S-NOB	4.67895	8.97439e-08
k__Bacteria.p__Actinobacteriota.c__Actinobacteria.o__Corynebacteriales.f__Mycobacteriaceae.g__Mycobacterium	2.55592			1.25815e-05
k__Bacteria.p__Actinobacteriota.c__Actinobacteria.o__Frankiales.f__Sporichthyaceae.g__Candidatus_Planktophila	1.15799			-
k__Bacteria.p__Proteobacteria.c__Gammaproteobacteria.o__SS1_B_09_64	1.85081			-
k__Bacteria.p__Proteobacteria.c__Gammaproteobacteria.o__Cellvibrionales	3.06891			1.15876e-05
k__Bacteria.p__Proteobacteria.c__Alphaproteobacteria.o__Azospirillales.f__Azospirillaceae.g__Niveispirillum	2.26932			-
k__Bacteria.p__Proteobacteria.c__Gammaproteobacteria.o__Steroidobacterales.f__Woeseiaceae	2.92805			0.000100301
k__Bacteria.p__Firmicutes.c__Clostridia.o__Lachnospirales.f__Lachnospiraceae.g__Tyzzerella	2.05816			-
k__Bacteria.p__Proteobacteria.c__Alphaproteobacteria.o__Rhizobiales.Other	2.57479			0.00246595
k__Bacteria.p__Firmicutes.c__Clostridia.o__Caldicoprobacterales.f__Caldicoprobacteraceae	1.49921			-
k__Bacteria.p__Proteobacteria.c__Gammaproteobacteria.o__Oceanospirillales.f__Halomonadaceae.g__Halomonas	1.72892			-
k__Bacteria.p__Bacteroidota.c__Bacteroidia.o__Cytophagales.f__Hymenobacteraceae	3.27398			2.0639e-06
k__Bacteria.p__Firmicutes.Other.Other.Other	2.27074			0.00568491
k__Bacteria.p__Actinobacteriota.c__Coriobacteriia.o__Coriobacteriales.f__Eggerthellaceae.Other	1.91929			0.00506015
k__Bacteria.p__Acidobacteriota.c__Holophagae	3.21012			4.92753e-06
k__Bacteria.p__Proteobacteria.c__Alphaproteobacteria.o__Sphingomonadales.f__Sphingomonadaceae.g__Sphingopyxis	2.36201			-
k__Bacteria.p__Proteobacteria.c__Alphaproteobacteria.o__Elsterales.Other	2.02367			0.00373826
k__Bacteria.p__Bdellovibrionota.c__Bdellovibrionia	2.75708			7.247e-06
k__Bacteria.p__Proteobacteria.c__Gammaproteobacteria.o__Burkholderiales	4.65411	S-NOB	4.34657	2.04364e-07
k__Bacteria.p__Desulfobacterota.c__Desulfovibrionia.o__Desulfovibrionales.f__Desulfomicrobiaceae	1.47533			-
k__Bacteria.p__Proteobacteria.c__Alphaproteobacteria.o__uncultured	2.99955			2.09609e-06
k__Bacteria.p__Proteobacteria.c__Alphaproteobacteria.o__Rhodobacterales.f__Rhodobacteraceae.g__Aliiroseovarius	1.67987			0.0451259
k__Bacteria.p__Proteobacteria.c__Gammaproteobacteria.o__211ds20.f__211ds20.g__211ds20	1.84118			0.00792646
k__Bacteria.p__Actinobacteriota.c__Actinobacteria.o__Streptosporangiales.f__Streptosporangiaceae.g__Herbidospora	1.72281			-
k__Bacteria.p__Firmicutes.c__Clostridia.o__Christensenellales.f__Christensenellaceae	3.45844			1.08592e-05
k__Bacteria.p__Acidobacteriota.c__Acidobacteriae.o__Solibacterales.f__Solibacteraceae.g__Candidatus_Solibacter	2.92981			0.00044952
k__Bacteria.p__Proteobacteria.c__Alphaproteobacteria.o__Elsterales	2.7967			2.2445e-05
k__Bacteria.p__Bacteroidota.c__Bacteroidia.o__Bacteroidales	5.74973	L-C	5.44441	3.73488e-08
k__Bacteria.p__Desulfobacterota.c__Desulfobacteria.o__Desulfobacterales.f__Desulfobacteraceae.g__uncultured	1.75918			0.00792646
k__Bacteria.p__Proteobacteria.c__Alphaproteobacteria.o__Caulobacterales.f__Caulobacteraceae.g__uncultured	3.98816			2.24248e-07
k__Bacteria.p__Patescibacteria.c__Saccharimonadia.o__Saccharimonadales.Other.Other	2.03909			-
k__Bacteria.p__Proteobacteria.c__Gammaproteobacteria.o__Tenderiales.f__Tenderiaceae.g__Candidatus_Tenderia	1.47054			-
k__Bacteria.p__Actinobacteriota.c__Acidimicrobiia.o__IMCC26256.f__IMCC26256	3.20352			7.00272e-06
k__Bacteria.p__Bacteroidota.c__Bacteroidia.o__Flavobacteriales.f__Flavobacteriaceae.g__Flavobacterium	3.18173			1.44492e-07
k__Bacteria.p__Bacteroidota.c__Bacteroidia.o__Sphingobacteriales.f__Sphingobacteriaceae	3.00757			1.95153e-05
k__Bacteria.p__Proteobacteria.c__Gammaproteobacteria.o__1013_28_CG33.f__1013_28_CG33.g__1013_28_CG33	1.80153			-
k__Bacteria.p__Proteobacteria.c__Alphaproteobacteria.o__Rhizobiales.f__Rhizobiaceae.g__Allorhizobium_Neorhizobium_Pararhizobium_Rhizobium	2.75882			1.89334e-06
k__Bacteria.p__Desulfobacterota.c__Desulfobacteria.o__Desulfobacterales.f__Desulfobacteraceae.g__Desulfotignum	1.22679			-
k__Bacteria.p__Actinobacteriota.c__Actinobacteria.o__Nitriliruptorales.f__Nitriliruptoraceae.Other	2.18193			-
k__Bacteria.p__Proteobacteria.c__Gammaproteobacteria.o__Chromatiales.f__Chromatiaceae.g__Candidatus_Thiobios	1.43052			-
k__Bacteria.p__Planctomycetota.c__Pla4_lineage.o__Pla4_lineage	0.850814			-
k__Bacteria.p__Proteobacteria.c__Alphaproteobacteria.o__Rhizobiales.f__Pleomorphomonadaceae	1.33098			-
k__Bacteria.p__Actinobacteriota.c__Actinobacteria.o__Actinomycetales.f__Actinomycetaceae.g__Actinomyces	2.99092			0.00079562
k__Bacteria.p__Actinobacteriota.c__Coriobacteriia.o__Coriobacteriales.f__Atopobiaceae.Other	1.44753			0.00792646
k__Bacteria.p__Proteobacteria.c__Alphaproteobacteria.o__Caedibacterales.f__Caedibacteraceae	1.76608			-
k__Bacteria.p__Desulfobacterota.c__Desulfuromonadia.Other.Other.Other	0.596385			-
k__Bacteria.p__Bacteroidota.c__Bacteroidia.o__Sphingobacteriales.f__Sphingobacteriaceae.g__Pelobium	0.963443			-
k__Bacteria.p__Firmicutes.c__Bacilli.o__Bacillales.f__Bacillaceae.g__Fictibacillus	2.69793			0.000503297
k__Bacteria.p__Elusimicrobiota.c__Endomicrobia.o__Endomicrobiales.f__Endomicrobiaceae.g__Endomicrobium	1.73155			-
k__Bacteria.p__Proteobacteria.c__Alphaproteobacteria.o__Dongiales	3.05874			1.91198e-06
k__Bacteria.p__Firmicutes.c__Clostridia.o__Lachnospirales.f__Lachnospiraceae.g__Vallitalea	1.62544			-
k__Bacteria.p__Firmicutes.c__Bacilli.o__Erysipelotrichales.f__Erysipelotrichaceae.g__Erysipelotrichaceae	1.19401			0.00880157
k__Bacteria.p__Proteobacteria.c__Alphaproteobacteria.o__Rhizobiales.f__Xanthobacteraceae.g__Rhodoplanes	2.41681			-
k__Bacteria.p__Proteobacteria.c__Gammaproteobacteria.o__Ectothiorhodospirales.f__Ectothiorhodospiraceae.g__uncultured	1.98573			-
k__Bacteria.p__Spirochaetota.c__Spirochaetia.o__Spirochaetales.f__Spirochaetaceae.Other	2.88947			9.03317e-05
k__Bacteria.p__Myxococcota.c__Polyangia.o__Haliangiales	2.94458			0.000340781
k__Bacteria.p__Myxococcota.c__Myxococcia.o__Myxococcales.f__Myxococcaceae	3.07622			6.86345e-06
k__Bacteria.p__Firmicutes.c__Bacilli.o__Erysipelotrichales.f__Erysipelotrichaceae.g__uncultured	2.38222			0.000494961
k__Bacteria.p__Proteobacteria.c__Alphaproteobacteria.o__Caulobacterales.f__Caulobacteraceae.g__PMMR1	1.38671			-
k__Bacteria.p__Proteobacteria.c__Gammaproteobacteria.o__Burkholderiales.f__Burkholderiaceae.g__Lautropia	3.10406			2.27066e-06
k__Bacteria.p__Gemmatimonadota.c__Longimicrobia.o__Longimicrobiales.f__Longimicrobiaceae.Other	1.47879			-
k__Bacteria.p__Firmicutes.c__Clostridia.o__Lachnospirales.f__Lachnospiraceae.g__Lachnospiraceae_FCS020_group	3.5471			3.08776e-06
k__Bacteria.p__Bacteroidota.c__Bacteroidia.o__Bacteroidales.f__Marinilabiliaceae	2.09893			0.000706789
k__Bacteria.p__Bdellovibrionota.c__Bdellovibrionia.o__Bdellovibrionales.f__Bdellovibrionaceae.g__Bdellovibrio	2.51744			0.000101221
k__Bacteria.p__Proteobacteria.c__Gammaproteobacteria.o__Burkholderiales.f__Comamonadaceae.g__Acidovorax	2.10122			-
k__Bacteria.p__Actinobacteriota.c__Actinobacteria.o__Streptosporangiales.f__Thermomonosporaceae.Other	1.95005			-
k__Bacteria.p__Nitrospirota.c__Thermodesulfovibrionia.o__uncultured.f__uncultured.g__uncultured	1.82974			-
k__Bacteria.p__Patescibacteria.c__Gracilibacteria.o__JGI_0000069_P22.f__JGI_0000069_P22.g__JGI_0000069_P22	0.963443			-
k__Bacteria.p__Bacteroidota.c__Bacteroidia.o__Bacteroidales.f__Porphyromonadaceae	3.22103			2.331e-06
k__Bacteria.p__Actinobacteriota.c__Acidimicrobiia.o__uncultured.f__uncultured	2.87888			0.00162011
k__Bacteria.p__Bacteroidota.c__Bacteroidia.o__SM1A07.f__SM1A07	1.40664			-
k__Bacteria.p__Actinobacteriota.c__Actinobacteria.o__Actinomycetales.f__Actinomycetaceae	2.99092			0.00079562
k__Bacteria.p__Proteobacteria.c__Gammaproteobacteria.o__Burkholderiales.f__Neisseriaceae.g__Neisseria	4.1118			5.80204e-07
k__Bacteria.p__Bacteroidota.c__Bacteroidia.o__Bacteroidales.f__Bacteroidales_RF16_group.g__Bacteroidales_RF16_group	2.40798			0.0353986
k__Bacteria.p__Firmicutes.c__Bacilli.o__Erysipelotrichales.f__Erysipelotrichaceae.g__ZOR0006	1.40359			-
k__Bacteria.p__Desulfobacterota.c__Desulfuromonadia.o__Sva1033	1.9748			0.0478705
k__Bacteria.p__Proteobacteria.c__Gammaproteobacteria.o__Xanthomonadales.f__Rhodanobacteraceae.Other	1.66241			-
k__Bacteria.p__Actinobacteriota.c__Thermoleophilia.o__Gaiellales.f__Gaiellaceae.g__Gaiella	2.98698			5.66799e-06
k__Bacteria.p__Chloroflexi.c__Anaerolineae.o__Ardenticatenales	1.79275			-
k__Bacteria.p__Acidobacteriota.c__Acidobacteriae.o__Acidobacteriales.f__Acidobacteriales.g__Acidobacteriales	2.09931			-
k__Bacteria.p__Proteobacteria.c__Alphaproteobacteria.o__Sphingomonadales.f__Sphingomonadaceae.g__Sphingoaurantiacus	2.0425			0.0329924
k__Bacteria.p__Proteobacteria.c__Alphaproteobacteria.o__Rhizobiales.f__A0839	2.40454			-
k__Bacteria.p__Chloroflexi.c__Anaerolineae.o__Anaerolineae.f__Anaerolineae	0.924952			-
k__Bacteria.p__Patescibacteria.c__Gracilibacteria.Other	1.91363			-
k__Bacteria.p__Bacteroidota.c__Bacteroidia.o__Cytophagales.f__Hymenobacteraceae.g__Pontibacter	1.28621			-
k__Bacteria.p__Desulfobacterota.c__Desulfuromonadia.o__Desulfuromonadia.Other	1.78741			-
k__Bacteria.p__Proteobacteria.c__Gammaproteobacteria.o__Ga0077536.f__Ga0077536.g__Ga0077536	1.44168			-
k__Bacteria.p__Acidobacteriota.c__Subgroup_26.o__Subgroup_26.f__Subgroup_26	2.08026			-
k__Bacteria.p__Chloroflexi.c__Anaerolineae.Other.Other	1.72426			-
k__Bacteria.p__Firmicutes.c__Clostridia.o__Lachnospirales.f__Lachnospiraceae.g__Johnsonella	1.6734			-
k__Bacteria.p__Bacteroidota.c__Kryptonia.o__Kryptoniales.f__MSB_3C8	1.76608			-
k__Bacteria.p__Actinobacteriota.c__Actinobacteria.o__Propionibacteriales	3.31415			4.3545e-07
k__Bacteria.p__Actinobacteriota.c__Actinobacteria.o__Pseudonocardiales.f__Pseudonocardiaceae.g__Pseudonocardia	2.6982			5.27687e-05
k__Bacteria.p__Bacteroidota.c__Bacteroidia.o__Chitinophagales.f__Saprospiraceae.g__Haliscomenobacter	1.22201			-
k__Bacteria.p__Verrucomicrobiota.c__Verrucomicrobiae.o__Pedosphaerales.f__Pedosphaeraceae.g__ADurb_Bin063_1	1.36138			-
k__Bacteria.p__Proteobacteria.c__Gammaproteobacteria.o__Xanthomonadales.f__Xanthomonadaceae	3.41185			4.66565e-07
k__Bacteria.p__Actinobacteriota.c__Coriobacteriia.o__Coriobacteriales.f__Atopobiaceae.g__Coriobacteriaceae_UCG_002	3.29471			0.0237744
k__Bacteria.p__Actinobacteriota.c__Coriobacteriia.o__OPB41.f__OPB41	0.755443			-
k__Bacteria.p__Acidobacteriota.c__Subgroup_21.o__Subgroup_21.f__Subgroup_21	0.32774			-
k__Bacteria.p__Verrucomicrobiota.c__Verrucomicrobiae.o__Pedosphaerales.f__Pedosphaeraceae.g__Ellin516	1.36396			-
k__Bacteria.p__Proteobacteria.c__Gammaproteobacteria.o__211ds20	1.84118			0.00792646
k__Bacteria.p__Proteobacteria.c__Alphaproteobacteria.o__Caulobacterales.f__Caulobacteraceae.g__Caulobacter	2.79321			3.32099e-06
k__Bacteria.p__Proteobacteria.c__Gammaproteobacteria.o__Tenderiales.f__Tenderiaceae	1.47054			-
k__Bacteria.p__Actinobacteriota.c__MB_A2_108.o__MB_A2_108	3.28427			3.52345e-06
k__Bacteria.p__Spirochaetota.c__Leptospirae.o__Leptospirales.f__Leptospiraceae.g__Leptospiraceae	1.71126			-
k__Bacteria.p__Proteobacteria.c__Alphaproteobacteria	4.82346	S-Anti	4.52033	8.31295e-08
k__Bacteria.p__Proteobacteria.c__Gammaproteobacteria.o__Burkholderiales.f__Nitrosomonadaceae.g__uncultured	1.57185			-
k__Bacteria.p__Spirochaetota.c__Brevinematia.o__Brevinematales.f__Brevinemataceae	2.82566			1.88257e-05
k__Bacteria.p__Proteobacteria.c__Alphaproteobacteria.o__Caulobacterales.f__Hyphomonadaceae.g__Hyphobacterium	1.75763			-
k__Bacteria.p__Latescibacterota.c__Latescibacterota	1.94275			-
k__Bacteria.p__Firmicutes.c__Clostridia.o__Caldicoprobacterales.f__Caldicoprobacteraceae.g__Caldicoprobacter	1.49921			-
k__Bacteria.p__Actinobacteriota.c__Actinobacteria.o__Frankiales.f__uncultured	2.26703			0.00531422
k__Bacteria.p__Bacteroidota.c__Bacteroidia.o__Flavobacteriales.f__Weeksellaceae.g__Ornithobacterium	1.52683			-
k__Bacteria.p__Firmicutes.c__Bacilli.o__Bacillales.f__Bacillaceae	3.1893			3.54853e-05
k__Bacteria.p__Firmicutes.c__Clostridia.o__Oscillospirales.f__Oscillospiraceae.g__Intestinimonas	2.9814			8.81892e-06
k__Bacteria.p__Proteobacteria.c__Gammaproteobacteria.o__Pasteurellales.f__Pasteurellaceae.g__Haemophilus	3.65281			9.26914e-07
k__Bacteria.p__Firmicutes.c__Clostridia.o__Oscillospirales.f__Ethanoligenenaceae.g__Acetanaerobacterium	1.16402			-
k__Bacteria.p__Proteobacteria.c__Gammaproteobacteria.o__Pseudomonadales.f__Pseudomonadaceae	3.07744			1.94343e-06
k__Bacteria.p__Proteobacteria.c__Gammaproteobacteria.o__Burkholderiales.f__Alcaligenaceae.g__Bordetella	0.318918			-
k__Bacteria.p__Proteobacteria.c__Gammaproteobacteria.o__Xanthomonadales.f__Rhodanobacteraceae.g__Ahniella	1.98352			0.0329924
k__Bacteria.p__Firmicutes.c__Clostridia.o__Lachnospirales.f__Lachnospiraceae.g__Howardella	2.1226			-
k__Bacteria.p__Proteobacteria.c__Gammaproteobacteria.o__Coxiellales.f__Coxiellaceae	1.55415			-
k__Bacteria.p__Proteobacteria.c__Alphaproteobacteria.o__Puniceispirillales	2.22944			0.0227902
k__Bacteria.p__Actinobacteriota.c__Acidimicrobiia.o__Microtrichales.f__Ilumatobacteraceae.Other	1.72568			-
k__Bacteria.p__Bacteroidota.c__Bacteroidia.o__Bacteroidales.f__F082.g__F082	3.04043			1.05392e-06
k__Bacteria.p__Chloroflexi.Other.Other.Other	2.32676			0.00920644
k__Bacteria.p__Proteobacteria.c__Alphaproteobacteria.o__Rickettsiales.f__SM2D12	2.31488			0.0388364
k__Bacteria.p__Patescibacteria.c__Parcubacteria.Other	1.73754			-
k__Bacteria.p__Firmicutes.c__Bacilli.o__Lactobacillales.f__Streptococcaceae.g__Lactococcus	1.98884			-
k__Bacteria.p__Zixibacteria.c__Zixibacteria.o__Zixibacteria.f__Zixibacteria	2.03938			-
k__Bacteria.p__Acidobacteriota.c__Acidobacteriae.o__Subgroup_15.f__Subgroup_15	1.63511			-
k__Bacteria.p__Proteobacteria.c__Alphaproteobacteria.o__Rhizobiales.f__Rhizobiales_Incertae_Sedis.g__Nordella	2.56415			0.000700353
k__Bacteria.p__Actinobacteriota.c__Acidimicrobiia.o__Microtrichales.f__Ilumatobacteraceae.g__CL500_29_marine_group	1.94215			-
k__Bacteria.p__Firmicutes.c__Clostridia.o__Christensenellales.f__Christensenellaceae.g__Christensenellaceae	1.85461			0.000547563
k__Bacteria.p__Bacteroidota.c__Bacteroidia.o__Sphingobacteriales.f__Sphingobacteriaceae.g__Sphingobacterium	1.89765			-
k__Bacteria.p__Firmicutes.c__Bacilli.o__Paenibacillales	2.18188			-
k__Bacteria.p__Firmicutes.c__Clostridia.o__Peptostreptococcales_Tissierellales.f__Anaerovoracaceae.g___Eubacterium__nodatum_group	4.0439			0.00284119
k__Bacteria.p__Desulfobacterota.c__Desulfuromonadia.o__Geobacterales.f__Geobacteraceae	2.12589			-
k__Bacteria.p__Acidobacteriota.c__Subgroup_22.o__Subgroup_22.f__Subgroup_22.g__Subgroup_22	2.62808			0.00734574
k__Bacteria.p__Actinobacteriota.c__Actinobacteria.o__Frankiales.f__Sporichthyaceae.Other	1.68805			-
k__Bacteria.p__Firmicutes.c__Clostridia.o__Peptostreptococcales_Tissierellales.f__Anaerovoracaceae.g__Family_XIII_AD3011_group	2.7181			0.00125567
k__Bacteria.p__Verrucomicrobiota.c__Verrucomicrobiae	2.44879			0.00350308
k__Bacteria.p__Chloroflexi.c__Anaerolineae.o__Anaerolineae	0.924952			-
k__Bacteria.p__Actinobacteriota.c__Actinobacteria.o__Propionibacteriales.f__Nocardioidaceae.g__uncultured	1.16376			-
k__Bacteria.p__Firmicutes.c__Clostridia.o__Peptostreptococcales_Tissierellales.f__Peptostreptococcaceae.Other	2.12777			-
k__Bacteria.p__Actinobacteriota.c__Rubrobacteria	3.06972			2.52608e-05
k__Bacteria.p__Patescibacteria.c__Gracilibacteria.o__JGI_0000069_P22	0.963443			-
k__Bacteria.p__Firmicutes.c__Bacilli.o__Lactobacillales.f__Vagococcaceae	0.624146			-
k__Bacteria.p__Bacteroidota.c__Bacteroidia.o__Flavobacteriales	3.53262			4.05942e-08
k__Bacteria.p__Acidobacteriota.c__Vicinamibacteria.o__Vicinamibacterales.f__Vicinamibacteraceae.g__Vicinamibacteraceae	1.91245			-
k__Bacteria.p__Firmicutes.c__Bacilli.o__Lactobacillales	5.14519	S-NOB	4.80966	1.73059e-07
k__Bacteria.p__Proteobacteria.c__Gammaproteobacteria.o__Burkholderiales.f__Comamonadaceae.g__Ideonella	2.24677			0.00869281
k__Bacteria.p__Bacteroidota.c__Bacteroidia.o__Bacteroidales.f__F082	3.04043			1.05392e-06
k__Bacteria.p__Verrucomicrobiota.c__Omnitrophia.o__Omnitrophales.f__Omnitrophales	1.49267			-
k__Bacteria.p__Acidobacteriota.c__Acidobacteriae.Other	2.69469			-
k__Bacteria.p__Deferribacterota.c__Deferribacteres.o__Deferribacterales.f__Deferribacteraceae	3.56775			5.68499e-06
k__Bacteria.p__Firmicutes.c__Clostridia.o__uncultured.f__uncultured.g__uncultured	3.03316			1.90849e-06
k__Bacteria.p__Bacteroidota.c__Kapabacteria	2.43168			0.0177373
k__Bacteria.p__Desulfobacterota.c__Desulfovibrionia.o__Desulfovibrionales.Other	2.15397			1.51075e-06
k__Bacteria.p__Firmicutes.c__Clostridia.o__Oscillospirales.f__Ruminococcaceae.Other	3.24807			0.000103351
k__Bacteria.p__Acidobacteriota.c__Acidobacteriae.o__Acidobacteriales.Other.Other	2.16251			0.00520139
k__Bacteria.p__Acidobacteriota.c__Acidobacteriae.o__Acidobacteriales.f__Acidobacteriaceae__Subgroup_1_	3.07287			4.02753e-06
k__Bacteria.p__Firmicutes.c__Bacilli.o__Lactobacillales.f__Catellicoccaceae.g__Catellicoccus	2.79225			4.16802e-05
k__Bacteria.p__Proteobacteria.c__Alphaproteobacteria.o__Sphingomonadales.f__Sphingomonadaceae	4.33826	S-Anti	4.02962	3.12384e-07
k__Bacteria.p__Actinobacteriota.c__Actinobacteria.o__Micrococcales.f__Cellulomonadaceae	2.46684			-
k__Bacteria.p__Firmicutes.c__Clostridia.o__Clostridiales.f__Caloramatoraceae	1.02671			-
k__Bacteria.p__Proteobacteria.c__Alphaproteobacteria.o__Rhizobiales.f__Rhodomicrobiaceae	1.73964			-
k__Bacteria.p__Proteobacteria.c__Gammaproteobacteria.o__Burkholderiales.f__Hydrogenophilaceae	1.81227			-
k__Bacteria.p__Actinobacteriota.c__Thermoleophilia.Other	2.15875			0.0157564
k__Bacteria.p__Actinobacteriota.c__Thermoleophilia.o__uncultured.f__uncultured	1.88999			-
k__Bacteria.p__Proteobacteria.c__Alphaproteobacteria.o__Reyranellales	2.93661			1.26833e-05
k__Bacteria.p__Bacteroidota.c__Bacteroidia.o__Bacteroidales.f__Tannerellaceae	3.78185			6.11778e-07
k__Bacteria.p__Bacteroidota.c__Bacteroidia.o__Chitinophagales.f__Saprospiraceae.g__uncultured	2.69691			5.3052e-05
k__Bacteria.p__Proteobacteria.c__Gammaproteobacteria.o__Acidiferrobacterales.f__Acidiferrobacteraceae	1.73155			-
k__Bacteria.p__Acidobacteriota.c__Acidobacteriae.o__Acidobacteriales.f__Acidobacteriaceae__Subgroup_1_.g__Terriglobus	1.61666			-
k__Bacteria.p__Firmicutes.c__Clostridia.o__Lachnospirales.f__Lachnospiraceae.g__Catonella	1.31289			-
k__Bacteria.p__Firmicutes.c__Clostridia.o__Lachnospirales.f__Lachnospiraceae.g___Eubacterium__hallii_group	2.65872			0.000393762
k__Bacteria.p__Actinobacteriota.c__Coriobacteriia.o__Coriobacteriales.f__Atopobiaceae	3.30127			0.00682738
k__Bacteria.p__Patescibacteria.c__Gracilibacteria.Other.Other	1.91363			-
k__Bacteria.p__Entotheonellaeota.c__Entotheonellia.o__Entotheonellales.f__Entotheonellaceae.g__Candidatus_Entotheonella	1.61392			-
k__Bacteria.p__Planctomycetota	2.30343			-
k__Bacteria.p__Proteobacteria.c__Alphaproteobacteria.o__Rhizobiales.f__Rhizobiaceae.g__Aureimonas	1.75769			-
k__Bacteria.p__Firmicutes.c__Bacilli.o__Bacillales	3.22609			6.18828e-06
k__Bacteria.p__Proteobacteria.c__Gammaproteobacteria.o__KI89A_clade	2.06349			-
k__Bacteria.p__Proteobacteria.c__Gammaproteobacteria.o__Burkholderiales.f__Comamonadaceae.g__Curvibacter	1.42189			-
k__Bacteria.p__RCP2_54	2.64464			0.000300961
k__Bacteria.p__Actinobacteriota.c__Acidimicrobiia.o__Microtrichales.f__Microtrichaceae	1.64014			-
k__Bacteria.p__Proteobacteria.c__Gammaproteobacteria.o__Xanthomonadales.f__Rhodanobacteraceae.g__Dyella	2.99132			5.76077e-05
k__Bacteria.p__Firmicutes.c__Clostridia.o__Oscillospirales.f__Butyricicoccaceae.Other	1.72149			0.0104167
k__Bacteria.p__Spirochaetota.c__Brevinematia.o__Brevinematales.f__Brevinemataceae.g__Brevinema	2.82566			1.88257e-05
k__Bacteria.p__Proteobacteria.c__Gammaproteobacteria.o__Alteromonadales.f__Idiomarinaceae	1.27794			-
k__Bacteria.p__Actinobacteriota.c__Actinobacteria.o__Frankiales.f__Geodermatophilaceae.g__Blastococcus	2.67721			0.00272705
k__Bacteria.p__Bacteroidota.c__Bacteroidia.o__Bacteroidales.f__Prevotellaceae.g__Prevotellaceae_UCG_001	3.78644			5.51225e-07
k__Bacteria.p__Bdellovibrionota.c__Bdellovibrionia.o__Bacteriovoracales.f__Bacteriovoracaceae.g__Peredibacter	1.68932			-
k__Bacteria.p__Bacteroidota.c__Bacteroidia.o__Bacteroidales.f__Prevotellaceae.g__Prevotellaceae_UCG_003	2.23833			-
k__Bacteria.p__Bacteroidota.c__Bacteroidia.o__Bacteroidales.f__Prevotellaceae.g__Prevotellaceae_UCG_004	2.78552			1.45077e-06
k__Bacteria.p__Planctomycetota.c__Pla4_lineage.o__Pla4_lineage.f__Pla4_lineage.g__Pla4_lineage	0.850814			-
k__Bacteria.p__Patescibacteria.c__Parcubacteria.o__Candidatus_Kaiserbacteria.f__Candidatus_Kaiserbacteria	1.58764			-
k__Bacteria.p__Proteobacteria.c__Gammaproteobacteria.o__Burkholderiales.f__Sutterellaceae.Other	1.03164			-
k__Bacteria.p__Gemmatimonadota.c__Gemmatimonadetes.o__Gemmatimonadales.f__Gemmatimonadaceae.g__Roseisolibacter	2.69128			8.78282e-05
k__Bacteria.p__Gemmatimonadota.c__BD2_11_terrestrial_group.o__BD2_11_terrestrial_group.f__BD2_11_terrestrial_group.g__BD2_11_terrestrial_group	2.76812			0.000694757
k__Bacteria.p__Proteobacteria.c__Gammaproteobacteria.o__Pseudomonadales.f__Pseudomonadaceae.g__Pseudomonas	3.06185			1.9117e-06
k__Bacteria.p__Myxococcota.c__Polyangia.o__UASB_TL25.f__UASB_TL25	0.796539			-
k__Bacteria.p__Proteobacteria.c__Gammaproteobacteria.o__Burkholderiales.f__Rhodocyclaceae.Other	1.74105			-
k__Bacteria.Other	3.86091			5.96084e-08
k__Bacteria.p__Verrucomicrobiota.c__Verrucomicrobiae.o__Pedosphaerales.f__Pedosphaeraceae.Other	1.50751			-
k__Bacteria.p__Proteobacteria.c__Gammaproteobacteria.o__Burkholderiales.f__Comamonadaceae	3.78846			3.14605e-07
k__Bacteria.p__Desulfobacterota.c__Desulfobacteria.o__Desulfobacterales.f__Desulfosarcinaceae.g__LCP_80	1.39207			-
k__Bacteria.p__Proteobacteria.c__Gammaproteobacteria.o__Vibrionales.f__Vibrionaceae.g__Photobacterium	3.15509			0.000952142
k__Bacteria.p__Bacteroidota.c__Bacteroidia.o__Bacteroidales.f__Bacteroidales_RF16_group	2.40798			0.0353986
k__Bacteria.p__Proteobacteria.c__Alphaproteobacteria.o__Ferrovibrionales.f__Ferrovibrionaceae	2.57777			0.0275636
k__Bacteria.p__Firmicutes.c__Bacilli.o__Acholeplasmatales.f__Acholeplasmataceae	2.37922			0.00464068
k__Bacteria.p__Proteobacteria.c__Gammaproteobacteria.o__Burkholderiales.f__Oxalobacteraceae	3.30363			2.22926e-07
k__Bacteria.p__Proteobacteria.c__Gammaproteobacteria.o__R7C24.f__R7C24	2.44832			-
k__Bacteria.p__Proteobacteria.c__Alphaproteobacteria.o__Sphingomonadales.f__Sphingomonadaceae.g__Sphingosinicella	1.85177			0.0329924
k__Bacteria.p__Actinobacteriota.c__Coriobacteriia.o__Coriobacteriales.f__uncultured.g__uncultured	1.40978			-
k__Bacteria.p__MBNT15.c__MBNT15.o__MBNT15.f__MBNT15	2.32039			0.0466515
k__Bacteria.p__Bacteroidota.c__Kryptonia.o__Kryptoniales.f__MSB_3C8.g__MSB_3C8	1.76608			-
k__Bacteria.p__Fibrobacterota.c__Fibrobacteria.o__Fibrobacterales.f__Fibrobacteraceae.g__uncultured	2.20629			-
k__Bacteria.p__Proteobacteria.c__Gammaproteobacteria.o__Burkholderiales.f__Burkholderiaceae.g__Limnobacter	1.49582			-
k__Bacteria.p__Firmicutes.c__Clostridia.o__Lachnospirales.f__Lachnospiraceae.g__Lachnoclostridium	5.2748	L-NOB	4.9359	2.34415e-07
k__Bacteria.p__Bacteroidota.c__Bacteroidia.o__Chitinophagales.f__Chitinophagaceae.g__Dinghuibacter	2.01162			-
k__Bacteria.p__Chloroflexi.c__Anaerolineae.o__Anaerolineales.f__Anaerolineaceae	1.74764			-
k__Bacteria.p__Proteobacteria.c__Alphaproteobacteria.o__Rhizobiales.f__Methyloligellaceae.Other	1.93135			0.0450106
k__Bacteria.p__Proteobacteria.c__Gammaproteobacteria.o__Burkholderiales.f__Rhodocyclaceae.g__Candidatus_Accumulibacter	1.87887			-
[truncated: 23 more rows]

## Sheet: Top15_phylum
Taxonomy	S-C	S-Anti	S-NOB	L-C	L-NR	L-NOB
Firmicutes	0.405551	0.321967	0.329459	0.375799	0.954216	0.961216
Bacteroidota	0.546471	0.319409	0.313107	0.562714	0.030654	0.0238279
Proteobacteria	0.00434072	0.251407	0.246265	0.0133398	0.00921557	0.0109569
Actinobacteriota	0.00196233	0.0483786	0.0509555	0.0101304	0.00385371	0.00205938
Desulfobacterota	0.0333391	0.00607676	0.00562656	0.0283154	0.000414754	0.00030993
Acidobacteriota	0.00025302	0.011783	0.0113935	0.000503955	0.000374447	0.00034924
Gemmatimonadota	0.000178986	0.0108945	0.0105492	0.000443802	0.00026389	0.000263636
Fusobacteriota	5.27194e-05	0.00522627	0.00639991	0.000197035	0.000166658	0.000111594
Campilobacterota	0.000109507	0.00349254	0.00348709	0.00214512	0.000244476	0.000164224
Myxococcota	8.44486e-05	0.00423485	0.00463274	0.000142724	0.00012849	0.000128975
Deferribacterota	0.00350454	0.000605377	0.000634795	0.00354647	2.89555e-05	1.21828e-05
Spirochaetota	6.91535e-05	0.00204504	0.0021921	0.000216612	6.59724e-05	0.000249829
Chloroflexi	1.41561e-05	0.00177449	0.00132172	2.95237e-05	2.27037e-05	1.21828e-05
Nitrospirota	2.19664e-05	0.00092958	0.00120636	3.33128e-05	3.88266e-05	4.04469e-05
Patescibacteria	1.00883e-05	0.000912682	0.000777729	4.3575e-05	8.06146e-06	1.85179e-05

[truncated: 11 more sheets: Top15_genus, bacteria, SCFAs, 粪Primary unconjugated bile acid, 粪Taurine-conjugated bile acid, 粪Secondary bile acid, 粪ratio in bile acids, 血Primary unconjugated bile acid, 血Taurine-conjugated bile acid, 血Secondary bile acid, 血ratio in bile acids]
