# Supplementary material for: Dietary nobiletin regulated cefuroxime- and levofloxacin-associated “gut microbiota-metabolism” imbalance and intestinal barrier dysfunction in mice
Source: Royal Society of Chemistry journal article supplement (doi:10.1039/d3fo04378a), 2024-01-01
Supplement: d3fo04378a2.pdf [file d3fo04378a2.pdf]

| Gray value |                |             |             |             |             |             |             |
|------------|----------------|-------------|-------------|-------------|-------------|-------------|-------------|
| □          | GROUP          | S-C         | S-Anti      | S-NOB       | L-C         | L-NR        | L-NOB       |
| Repeat1    | occludin       | 352.381     | 128.659     | 226.884     | 363.936     | 185.491     | 218.611     |
|            | GAPDH          | 691.714     | 683.659     | 637.773     | 525.396     | 473.089     | 522.715     |
|            | occludin/GAPDH | 0.50943106  | 0.188191956 | 0.355744174 | 0.692688504 | 0.392084191 | 0.41822129  |
| Repeat2    | occludin       | 307.769     | 132.210     | 113.571     | 299.566     | 148.549     | 281.592     |
|            | GAPDH          | 545.240     | 537.370     | 519.946     | 394.882     | 337.429     | 302.241     |
|            | occludin/GAPDH | 0.564465636 | 0.246030946 | 0.218427942 | 0.758619781 | 0.440238024 | 0.931681603 |
| Repeat3    | occludin       | 371.993     | 123.185     | 159.493     | 386.405     | 190.867     | 303.563     |
|            | GAPDH          | 562.447     | 557.259     | 677.998     | 369.035     | 397.126     | 421.484     |
|            | occludin/GAPDH | 0.661382495 | 0.661382495 | 0.235240708 | 1.04707037  | 0.480621031 | 0.720224293 |

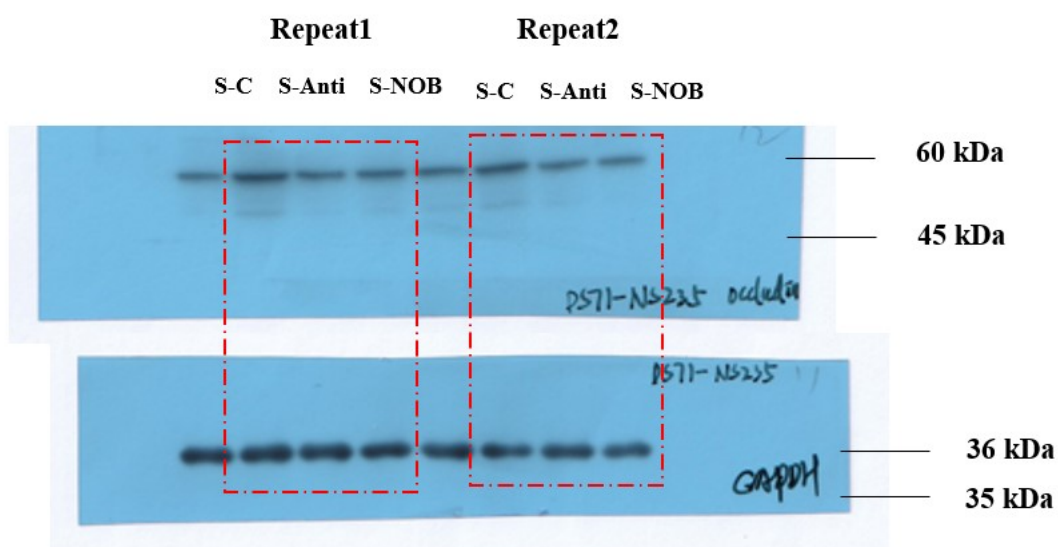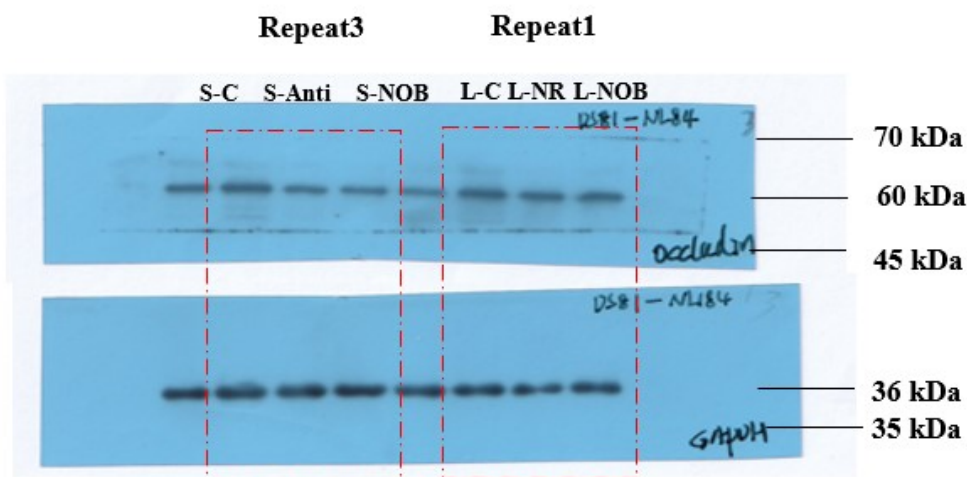

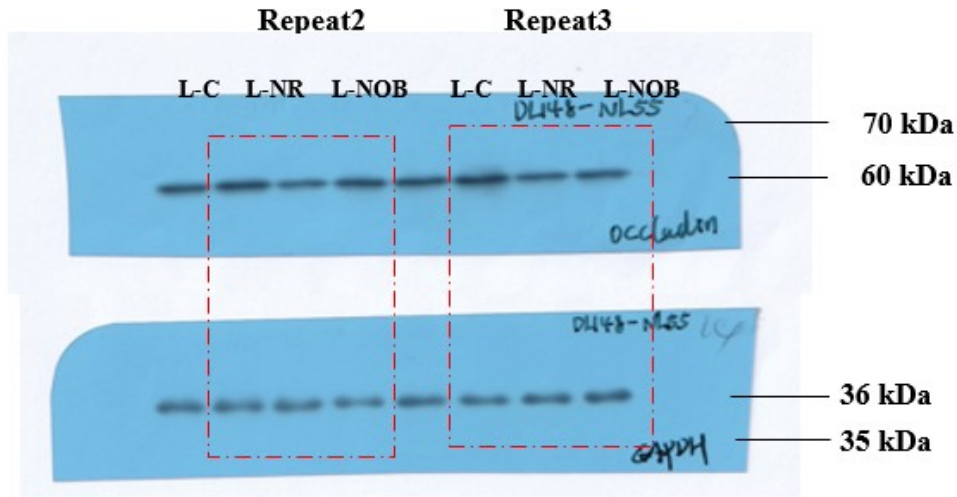

| Gray value |           |             |             |             |             |             |             |
|------------|-----------|-------------|-------------|-------------|-------------|-------------|-------------|
| □          | GROUP     | S-C         | S-Anti      | S-NOB       | L-C         | L-NR        | L-NOB       |
| Repeat 1   | ZO1       | 441.627     | 107.855     | 167.249     | 396.877     | 236.625     | 556.547     |
|            | GAPDH     | 691.714     | 683.659     | 637.773     | 585.460     | 521.319     | 503.723     |
|            | ZO1/GAPDH | 0.638452662 | 0.157760867 | 0.262238206 | 0.677890443 | 0.453897866 | 1.104866605 |
| Repeat 2   | ZO1       | 383.393     | 219.598     | 191.013     | 440.823     | 96.946      | 244.118     |
|            | GAPDH     | 545.240     | 537.370     | 519.946     | 394.882     | 337.429     | 302.241     |
|            | ZO1/GAPDH | 0.703163065 | 0.408653408 | 0.367371015 | 1.11633894  | 0.287309493 | 0.807692346 |
| Repeat 3   | ZO1       | 442.084     | 107.351     | 142.775     | 434.690     | 226.455     | 369.955     |
|            | GAPDH     | 562.447     | 557.259     | 677.998     | 369.035     | 397.126     | 421.484     |
|            | ZO1/GAPDH | 0.786001348 | 0.192640944 | 0.210583419 | 1.17791037  | 0.570232802 | 0.87774545  |

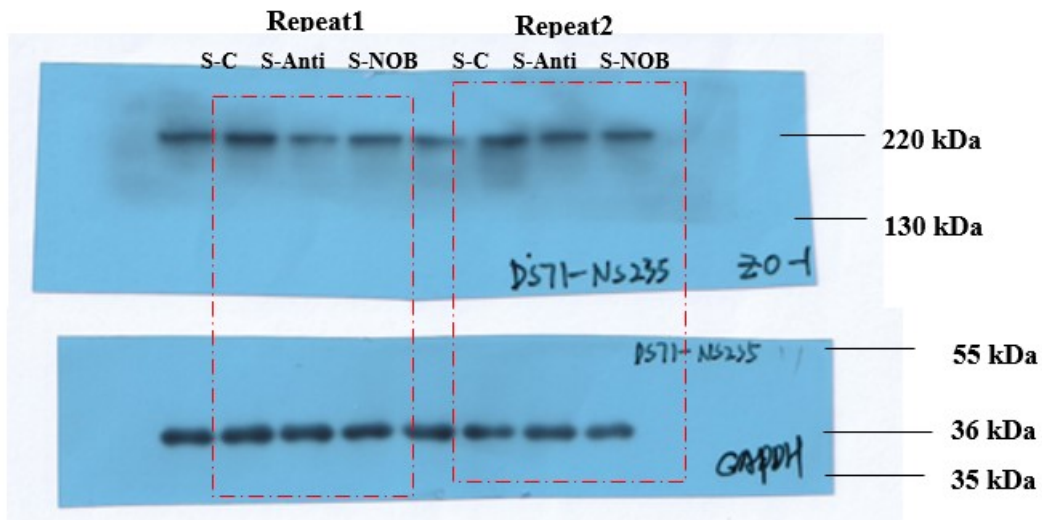

### Repeat3

S-C S-Anti S-NOB

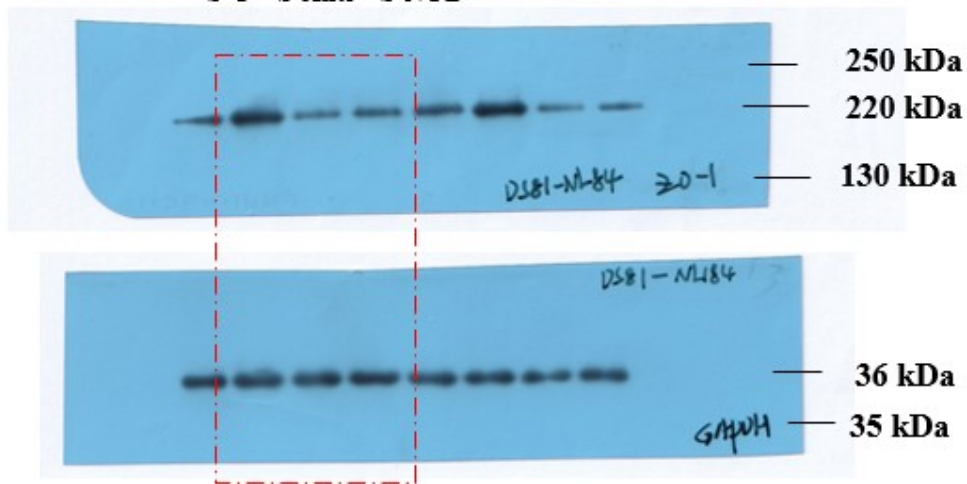

### Repeat1

L-C L-NR L-NOB

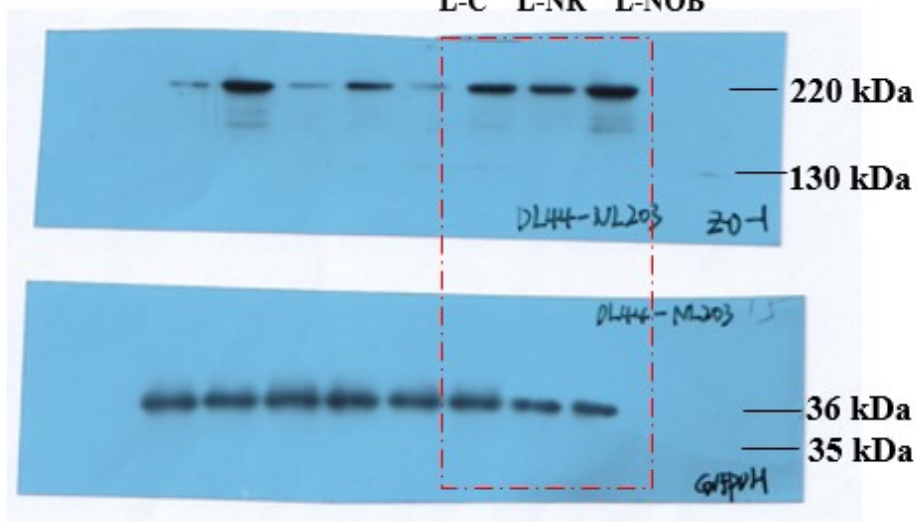

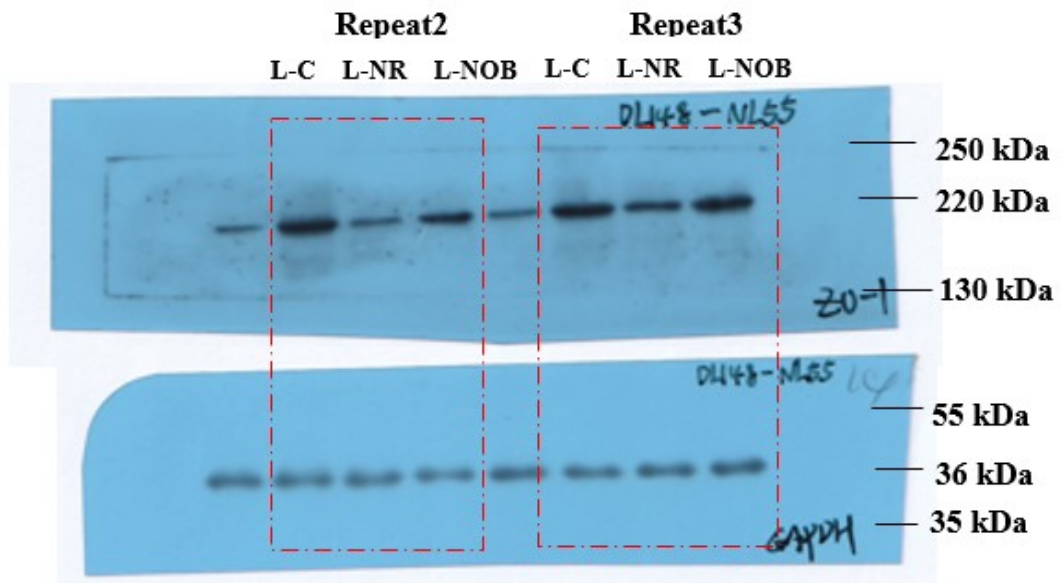

We are very sorry that the WB blotting presented in this article was only a part of our research project, so the raw images of WB also contained the results of other studies (we also investigate another active substance, so we conducted the WB analysis of samples from both NOB-treated mice and other treated mice.) The raw data about WB mentioned in our manuscript have been circled by us with red dashed boxes, and the detailed results were in the file with the raw data provided.

The samples we analyzed were divided into short-term and long-term experiments, with samples from the short-term experiments on the same gel as the controls, and samples from the long-term experiments on the same gel as the controls. The purpose of our experiments was to investigate the timely prevention of antibiotic-related intestinal barrier damage by NOB in the short term, and its role in helping to restore antibiotic-related intestinal barrier damage in the long term, not to compare the effects between the long and short term.
